# Supplementary material for: Influence of a Polyherbal Choline Source in Dogs: Body Weight Changes, Blood Metabolites, and Gene Expression
Source: MDPI journal article supplement (doi:10.3390/ani12101313), 2022-05-20
Supplement: s1 [file s1]

**Table S1.** Differentially Expressed Genes in whole blood of dogs supplemented with polyherbal choline versus choline chloride.

| Genbank   | Gene Name                                                              | Fold  |
|-----------|------------------------------------------------------------------------|-------|
| NM_008543 | SMAD family member 7(Smad7)                                            | -3.86 |
| NM_007995 | ficolin A(Fcna)                                                        | -3.56 |
| NM_010249 | GA repeat binding protein, beta 1(Gabpb1)                              | -3.36 |
| U41465    | B cell leukemia/lymphoma 6(Bcl6)                                       | -3.34 |
| NM_018760 | solute carrier family 4 (anion exchanger), member 4(Slc4a4)            | -3.33 |
| NM_009899 | chloride channel accessory 3A1(Clca3a1)                                | -3.27 |
| NM_010602 | potassium inwardly rectifying channel, subfamily J, member 11(Kcnj11)  | -3.21 |
| AK012039  | RIKEN cDNA 2610317O13 gene(2610317O13Rik)                              | -3.06 |
| AF038500  | guanylate cyclase 1, soluble, beta 2(Gucy1b2)                          | -3.02 |
| AF143539  | CD55 molecule, decay accelerating factor for complement(Cd55)          | -2.98 |
| AK015139  | RIKEN cDNA 4930414N06 gene(4930414N06Rik)                              | -2.96 |
| AF146224  | high mobility group 20B(Hmg20b)                                        | -2.94 |
| AF159856  | solute carrier family 38, member 3(Slc38a3)                            | -2.94 |
| NM_008589 | mesoderm posterior 2(Mesp2)                                            | -2.87 |
| AK004665  | DEAH (Asp-Glu-Ala-His) box polypeptide 35(Dhx35)                       | -2.85 |
| X07969    | X-linked lymphocyte-regulated(Xlr)                                     | -2.85 |
| NM_011907 | three prime repair exonuclease 2(Trex2)                                | -2.83 |
| K00083    | interferon gamma(Ifng)                                                 | -2.82 |
| AJ238332  | death inducer-obliterator 1(Dido1)                                     | -2.80 |
| NM_010771 | matrin 3(Matr3)                                                        | -2.79 |
| NM_008095 | glioblastoma amplified sequence(Gbas)                                  | -2.79 |
| U22262    | apolipoprotein B mRNA editing enzyme, catalytic polypeptide 1(Apobec1) | -2.77 |
| NM_013773 | T cell leukemia/lymphoma 1B, 1(Tcl1b1)                                 | -2.77 |
| NM_011915 | Wnt inhibitory factor 1(Wif1)                                          | -2.77 |

---

|           |                                                                     |       |
|-----------|---------------------------------------------------------------------|-------|
| NM_011403 | solute carrier family 4 (anion exchanger), member 1(Slc4a1)         | -2.76 |
| NM_008768 | orosomucoid 1(Orm1)                                                 | -2.74 |
| NM_009090 | polymerase (RNA) II (DNA directed) polypeptide C(Polr2c)            | -2.72 |
| AK010304  | SET domain containing 6(Setd6)                                      | -2.69 |
| AY027861  |                                                                     | -2.69 |
| NM_008517 | leukotriene A4 hydrolase(Lta4h)                                     | -2.68 |
| NM_007500 | atonal bHLH transcription factor 1(Atoh1)                           | -2.68 |
| M94307    |                                                                     | -2.64 |
| NM_007760 | carnitine acetyltransferase(Crat)                                   | -2.64 |
| U58881    | protein phosphatase 1, regulatory (inhibitor) subunit 13B(Ppp1r13b) | -2.61 |
| NM_018855 | growth arrest specific 8(Gas8)                                      | -2.61 |
| X54327    | glutamyl-prolyl-tRNA synthetase(Eprs)                               | -2.59 |
| X06762    | homeobox B7(Hoxb7)                                                  | -2.58 |
| NM_019732 | runt related transcription factor 3(Runx3)                          | -2.57 |
| NM_011694 | voltage-dependent anion channel 1(Vdac1)                            | -2.57 |
| NM_007853 | delta(4)-desaturase, sphingolipid 1(Degs1)                          | -2.57 |
| BC013080  | grainyhead-like 1 (Drosophila)(Grhl1)                               | -2.56 |
| NM_010691 | ladybird homeobox homolog 1 (Drosophila)(Lbx1)                      | -2.56 |
| X89594    | estrogen related receptor, beta(Esrrb)                              | -2.56 |
| NM_009175 |                                                                     | -2.55 |
| AF214013  | Terf1 (TRF1)-interacting nuclear factor 2(Tinf2)                    | -2.54 |
| NM_008219 | hemoglobin Z, beta-like embryonic chain(Hbb-bh1)                    | -2.53 |
| NM_007951 | enhancer of rudimentary homolog (Drosophila)(Erh)                   | -2.53 |
| NM_013784 | phosphatidylinositol glycan anchor biosynthesis, class N(Pign)      | -2.53 |
| X07541    |                                                                     | -2.53 |
| AK006023  | fucose-1-phosphate guanylyltransferase(Fpgt)                        | -2.53 |
| NM_011304 | RuvB-like protein 2(Ruvbl2)                                         | -2.52 |
| NM_021356 | growth factor receptor bound protein 2-associated protein 1(Gab1)   | -2.52 |

---

|           |                                                                    |       |
|-----------|--------------------------------------------------------------------|-------|
| NM_009195 | solute carrier family 12, member 4(Slc12a4)                        | -2.51 |
| AF140427  | T-box 5(Tbx5)                                                      | -2.51 |
| AJ131957  | SAC3 domain containing 1(Sac3d1)                                   | -2.51 |
| NM_013774 | T cell leukemia/lymphoma 1B, 4(Tcl1b4)                             | -2.50 |
| NM_011609 | tumor necrosis factor receptor superfamily, member 1a(Tnfrsf1a)    | -2.50 |
| AB041650  | FGFR1 oncogene partner 2(Fgfr1op2)                                 | -2.50 |
| NM_008774 | poly(A) binding protein, cytoplasmic 1(Pabpc1)                     | -2.49 |
| U51204    | microtubule-associated protein, RP/EB family, member 3(Mapre3)     | -2.49 |
| NM_011098 | paired-like homeodomain transcription factor 2(Pitx2)              | -2.49 |
| X56461    | homeobox B6(Hoxb6)                                                 | -2.48 |
| NM_019675 | stathmin-like 4(Stmn4)                                             | -2.48 |
| AK020669  | RIKEN cDNA 9630003H22 gene(9630003H22Rik)                          | -2.47 |
| AB010321  | zinc finger protein 27(Zfp27)                                      | -2.46 |
| NM_008852 | paired-like homeodomain transcription factor 3(Pitx3)              | -2.45 |
| NM_016717 | selenocysteine lyase(Scly)                                         | -2.45 |
| NM_008394 | interferon regulatory factor 9(Irf9)                               | -2.44 |
| NM_008331 | interferon-induced protein with tetratricopeptide repeats 1(Ifit1) | -2.43 |
| NM_016804 | metaxin 2(Mtx2)                                                    | -2.43 |
| AK019796  | RIKEN cDNA 4930570D08 gene(4930570D08Rik)                          | -2.43 |
| NM_030258 | G protein-coupled receptor 146(Gpr146)                             | -2.43 |
| NM_010759 | melanoma antigen, family B, 1(Mageb1)                              | -2.42 |
| AF026565  | midline 1(Mid1)                                                    | -2.42 |
| NM_008151 | G-protein coupled receptor 12(Gpr12)                               | -2.42 |
| AF172447  | afadin, adherens junction formation factor(Afdn)                   | -2.42 |
| NM_010420 | homeobox gene expressed in ES cells(Hesx1)                         | -2.42 |
| NM_016928 | toll-like receptor 5(Tlr5)                                         | -2.41 |
| NM_008644 | proline rich, lacrimal 1(Prol1)                                    | -2.41 |
| NM_019494 | chemokine (C-X-C motif) ligand 11(Cxcl11)                          | -2.41 |

---

|           |                                                                                                  |       |
|-----------|--------------------------------------------------------------------------------------------------|-------|
| NM_025829 | eukaryotic translation initiation factor 4E member 3(Eif4e3)                                     | -2.41 |
| NM_015749 | transcobalamin 2(Tcn2)                                                                           | -2.41 |
| Z12238    |                                                                                                  | -2.41 |
| AB039919  | Ras homolog enriched in brain(Rheb)                                                              | -2.40 |
| NM_011816 | GTPase activating protein (SH3 domain) binding protein 2(G3bp2)                                  | -2.39 |
| NM_008063 | solute carrier family 37 (glucose-6-phosphate transporter), member 4(Slc37a4)                    | -2.39 |
| NM_008718 | neuronal PAS domain protein 1(Npas1)                                                             | -2.39 |
| NM_008811 | pyruvate dehydrogenase E1 alpha 2(Pdha2)                                                         | -2.38 |
| NM_009317 | T cell acute lymphocytic leukemia 2(Tal2)                                                        | -2.38 |
| AK017044  | Williams Beuren syndrome chromosome region 25 (human)(Wbscr25)                                   | -2.38 |
| NM_008389 | IAP promoted placental gene(Ipp)                                                                 | -2.37 |
| NM_009896 | suppressor of cytokine signaling 1(Socs1)                                                        | -2.37 |
| NM_010162 | exostoses (multiple) 1(Ext1)                                                                     | -2.36 |
| NM_009508 | solute carrier family 32 (GABA vesicular transporter), member 1(Slc32a1)                         | -2.36 |
| NM_021363 | seminal vesicle secretory protein 3A(Svs3a)                                                      | -2.35 |
| AK013664  | solute carrier family 17 (sodium-dependent inorganic phosphate cotransporter), member 7(Slc17a7) | -2.35 |
| NM_018827 | cytokine receptor-like factor 1(Crlf1)                                                           | -2.33 |
| AK016340  | glutathione S-transferase, theta 4(Gstt4)                                                        | -2.33 |
| NM_008743 | nth (endonuclease III)-like 1 (E.coli)(Nthl1)                                                    | -2.32 |
| NM_011478 | small proline-rich protein 3(Sprp3)                                                              | -2.32 |
| NM_021317 | DnaJ heat shock protein family (Hsp40) member B7(Dnajb7)                                         | -2.32 |
| NM_011767 | zinc finger RNA binding protein(Zfr)                                                             | -2.31 |
| AJ231197  |                                                                                                  | -2.31 |
| D13903    | protein tyrosine phosphatase, receptor type, D(Ptprd)                                            | -2.31 |
| NM_009246 | serine (or cysteine) peptidase inhibitor, clade A, member 1D(Serpina1d)                          | -2.30 |
| NM_010809 | matrix metalloproteinase 3(Mmp3)                                                                 | -2.30 |
| AF144628  | slit homolog 2 (Drosophila)(Slit2)                                                               | -2.30 |
| AF121080  | solute carrier family 15, member 3(Slc15a3)                                                      | -2.30 |

---

|           |                                                                              |       |
|-----------|------------------------------------------------------------------------------|-------|
| AK019644  | RIKEN cDNA 4930473D10 gene(4930473D10Rik)                                    | -2.30 |
| NM_009460 | small ubiquitin-like modifier 1(Sumo1)                                       | -2.29 |
| NM_009852 | CD6 antigen(Cd6)                                                             | -2.29 |
| AF146593  | retinitis pigmentosa 1 (human)(Rp1)                                          | -2.29 |
| AB015423  | deltex 2, E3 ubiquitin ligase(Dtx2)                                          | -2.29 |
| NM_010250 | gamma-aminobutyric acid (GABA) A receptor, subunit alpha 1(Gabra1)           | -2.28 |
| L36434    | N-acetylglucosamine-1-phosphate transferase, alpha and beta subunits(Gnptab) | -2.28 |
| NM_008953 | BPI fold containing family A, member 2(Bpifa2)                               | -2.28 |
| NM_009327 | HNF1 homeobox A(Hnf1a)                                                       | -2.28 |
| NM_011896 | sprouty homolog 1 (Drosophila)(Spry1)                                        | -2.28 |
| NM_011930 | chloride channel, voltage-sensitive 7(Clcn7)                                 | -2.27 |
| NM_010485 | ELAV (embryonic lethal, abnormal vision)-like 1 (Hu antigen R)(Elavl1)       | -2.27 |
| AB025408  | esterase D/formylglutathione hydrolase(Esd)                                  | -2.27 |
| NM_009528 | wingless-type MMTV integration site family, member 7B(Wnt7b)                 | -2.26 |
| U22056    | a disintegrin and metallopeptidase domain 1a(Adam1a)                         | -2.25 |
| NM_008633 | microtubule-associated protein 4(Map4)                                       | -2.25 |
| NM_009044 | reticuloendotheliosis oncogene(Rel)                                          | -2.25 |
| NM_007473 | aquaporin 7(Aqp7)                                                            | -2.25 |
| X99243    |                                                                              | -2.25 |
| NM_009949 | carnitine palmitoyltransferase 2(Cpt2)                                       | -2.25 |
| NM_021568 | poly(rC) binding protein 3(Pcbp3)                                            | -2.25 |
| AV048854  | serine peptidase inhibitor, Kazal type 1(Spink1)                             | -2.25 |
| NM_008814 | pancreatic and duodenal homeobox 1(Pdx1)                                     | -2.25 |
| NM_007769 | deleted in malignant brain tumors 1(Dmbt1)                                   | -2.25 |
| BF579432  |                                                                              | -2.24 |
| NM_008853 | praja ring finger 1, E3 ubiquitin protein ligase(Pja1)                       | -2.24 |
| NM_021430 | Rab interacting lysosomal protein-like 1(Rilpl1)                             | -2.24 |
| NM_010345 | growth factor receptor bound protein 10(Grb10)                               | -2.24 |

---

|           |                                                                            |       |
|-----------|----------------------------------------------------------------------------|-------|
| AB049355  | family with sequence similarity 129, member A(Fam129a)                     | -2.24 |
| NM_010812 | forkhead box K1(Foxk1)                                                     | -2.24 |
| AF020191  | DMRT-like family B with proline-rich C-terminal, 1(Dmrtb1)                 | -2.23 |
| NM_008994 | peroxisomal biogenesis factor 2(Pex2)                                      | -2.23 |
| AK005828  | RIKEN cDNA 1700010I02 gene(1700010I02Rik)                                  | -2.23 |
| AW489963  |                                                                            | -2.22 |
| X83587    | REST corepressor 2(Rcor2)                                                  | -2.22 |
| NM_021309 | SH2 domain containing 2A(Sh2d2a)                                           | -2.22 |
| AJ297743  | torsin family 1, member B(Tor1b)                                           | -2.22 |
| AB047758  | protease, serine 44(Prss44)                                                | -2.22 |
| AB001423  | kinesin family member 16B(Kif16b)                                          | -2.22 |
| NM_019718 | ADP-ribosylation factor-like 3(Arl3)                                       | -2.21 |
| NM_009089 | polymerase (RNA) II (DNA directed) polypeptide A(Polr2a)                   | -2.21 |
| NM_021336 | small nuclear ribonucleoprotein polypeptide A'(Snrpa1)                     | -2.21 |
| NM_008799 | programmed cell death 2(Pdcd2)                                             | -2.21 |
| AK002854  | hydrogen voltage-gated channel 1(Hvcn1)                                    | -2.21 |
| NM_011603 | TATA box binding protein-like 1(Tbpl1)                                     | -2.21 |
| NM_009095 | ribosomal protein S5(Rps5)                                                 | -2.20 |
| NM_019914 | myeloid/lymphoid or mixed-lineage leukemia; translocated to, 11(Mllt11)    | -2.20 |
| NM_007445 | anti-Mullerian hormone(Amh)                                                | -2.20 |
| AK012523  | processing of precursor 5, ribonuclease P/MRP family (S. cerevisiae)(Pop5) | -2.19 |
| NM_010361 | glutathione S-transferase, theta 2(Gstt2)                                  | -2.19 |
| NM_011487 | signal transducer and activator of transcription 4(Stat4)                  | -2.19 |
| U69176    | laminin, alpha 4(Lama4)                                                    | -2.19 |
| AF143685  | myosin IXb(Myo9b)                                                          | -2.18 |
| AA497620  |                                                                            | -2.18 |
| NM_016807 | syndecan binding protein(Sdcbp)                                            | -2.18 |
| NM_008990 | nectin cell adhesion molecule 2(Nectin2)                                   | -2.18 |

---

|           |                                                                                            |       |
|-----------|--------------------------------------------------------------------------------------------|-------|
| NM_007600 | calpain 1(Capn1)                                                                           | -2.18 |
| AK020866  | RIKEN cDNA A930016I07 gene(A930016I07Rik)                                                  | -2.17 |
| AK010381  | asparaginase like 1(Asrgl1)                                                                | -2.17 |
| NM_010184 | Fc receptor, IgE, high affinity I, alpha polypeptide(Fcer1a)                               | -2.17 |
| NM_013743 | pyruvate dehydrogenase kinase, isoenzyme 4(Pdk4)                                           | -2.17 |
| NM_019943 | poly (A) polymerase beta (testis specific)(Papolb)                                         | -2.17 |
| NM_011798 | chemokine (C motif) receptor 1(Xcr1)                                                       | -2.16 |
| NM_010445 | H6 homeobox 1(Hmx1)                                                                        | -2.16 |
| NM_013868 | heat shock protein family, member 7 (cardiovascular)(Hspb7)                                | -2.16 |
| NM_009404 | tumor necrosis factor (ligand) superfamily, member 9(Tnfsf9)                               | -2.16 |
| NM_010671 | keratin associated protein 13(Krtap13)                                                     | -2.16 |
| AJ290946  | phosphodiesterase 4D interacting protein (myomegalin)(Pde4dip)                             | -2.16 |
| NM_010095 | early B cell factor 2(Ebf2)                                                                | -2.16 |
| U43892    | ATP-binding cassette, sub-family B (MDR/TAP), member 7(Abcb7)                              | -2.16 |
| NM_013604 | metaxin 1(Mtx1)                                                                            | -2.15 |
| NM_008999 | RAB23, member RAS oncogene family(Rab23)                                                   | -2.15 |
| NM_007453 | peroxiredoxin 6(Prdx6)                                                                     | -2.15 |
| X03766    | actin, alpha 1, skeletal muscle(Acta1)                                                     | -2.15 |
| M15434    | histone cluster 1, H3g(Hist1h3g)                                                           | -2.15 |
| NM_021396 | programmed cell death 1 ligand 2(Pdcd1lg2)                                                 | -2.15 |
| BC005719  | RNA binding motif protein 5(Rbm5)                                                          | -2.14 |
| NM_011942 | lysophospholipase 2(Lypla2)                                                                | -2.14 |
| D87968    | signal-regulatory protein alpha(Sirpa)                                                     | -2.14 |
| AB024336  | antigen p97 (melanoma associated) identified by monoclonal antibodies 133.2 and 96.5(Mfi2) | -2.14 |
| NM_008437 | napsin A aspartic peptidase(Napsa)                                                         | -2.14 |
| NM_009321 | tubulin cofactor A(Tbca)                                                                   | -2.14 |
| NM_007471 | amyloid beta (A4) precursor protein(App)                                                   | -2.14 |
| AF047716  |                                                                                            | -2.13 |

---

|           |                                                                           |       |
|-----------|---------------------------------------------------------------------------|-------|
| NM_009364 | tissue factor pathway inhibitor 2(Tfpi2)                                  | -2.13 |
| NM_008305 | perlecan (heparan sulfate proteoglycan 2)(Hspg2)                          | -2.13 |
| NM_010906 | nuclear factor I/X(Nfix)                                                  | -2.13 |
| NM_019497 | G protein-coupled receptor kinase 4(Grk4)                                 | -2.13 |
| M21836    | keratin 8(Krt8)                                                           | -2.12 |
| AK005740  | protease, serine 51(Prss51)                                               | -2.12 |
| NM_013895 | translocase of inner mitochondrial membrane 13(Timm13)                    | -2.11 |
| NM_008708 | N-myristoyltransferase 2(Nmt2)                                            | -2.11 |
| NM_019492 | regulator of G-protein signaling 3(Rgs3)                                  | -2.11 |
| X53584    | heat shock protein 1 (chaperonin)(Hspd1)                                  | -2.11 |
| NM_010743 | interleukin 1 receptor-like 1(Ill1rl1)                                    | -2.11 |
| NM_007384 | acid-sensing (proton-gated) ion channel 2(Asic2)                          | -2.10 |
| Z25851    |                                                                           | -2.10 |
| U49952    | dual-specificity tyrosine-(Y)-phosphorylation regulated kinase 1c(Dyrk1c) | -2.10 |
| NM_010556 | interleukin 3(Il3)                                                        | -2.09 |
| NM_021876 | embryonic ectoderm development(Eed)                                       | -2.09 |
| NM_008409 | integral membrane protein 2A(Itm2a)                                       | -2.09 |
| NM_010754 | SMAD family member 2(Smad2)                                               | -2.09 |
| NM_010231 | flavin containing monooxygenase 1(Fmo1)                                   | -2.09 |
| NM_024245 | kinesin family member 23(Kif23)                                           | -2.09 |
| NM_023403 | mesoderm development candidate 2(Mesdc2)                                  | -2.09 |
| NM_010745 | lymphocyte antigen 86(Ly86)                                               | -2.09 |
| NM_011139 | POU domain, class 2, transcription factor 3(Pou2f3)                       | -2.09 |
| NM_010767 | mannan-binding lectin serine peptidase 2(Masp2)                           | -2.09 |
| BC007161  | lysine (K)-specific demethylase 7A(Kdm7a)                                 | -2.09 |
| NM_008587 | c-mer proto-oncogene tyrosine kinase(Mertk)                               | -2.08 |
| NM_008703 | neuromedin B receptor(Nmbr)                                               | -2.08 |
| M27583    |                                                                           | -2.08 |



---

|           |                                                                      |       |
|-----------|----------------------------------------------------------------------|-------|
| NM_009626 | alcohol dehydrogenase 7 (class IV), mu or sigma polypeptide(Adh7)    | -2.08 |
| AK005558  | placenta expressed transcript 1(Plet1)                               | -2.08 |
| X73877    | phosphorylase kinase alpha 1(Phka1)                                  | -2.08 |
| AK004124  | RIKEN cDNA 1110036E04 gene(1110036E04Rik)                            | -2.07 |
| D87691    | eukaryotic translation termination factor 1(Etf1)                    | -2.07 |
| AF039601  | transforming growth factor, beta receptor III(Tgfb3)                 | -2.07 |
| NM_009233 | SRY (sex determining region Y)-box 1(Sox1)                           | -2.07 |
| D44443    | cDNA sequence BC005685(BC005685)                                     | -2.07 |
| AB001432  | kinesin family member 15(Kif15)                                      | -2.06 |
| NM_007524 | NK3 homeobox 2(Nkx3-2)                                               | -2.06 |
| NM_007428 | angiotensinogen (serpin peptidase inhibitor, clade A, member 8)(Agt) | -2.06 |
| AK007272  | RIKEN cDNA 1700124M09 gene(1700124M09Rik)                            | -2.06 |
| NM_008320 | interferon regulatory factor 8(Irf8)                                 | -2.06 |
| NM_011148 | protein phosphatase, EF hand calcium-binding domain 2(Ppef2)         | -2.06 |
| NM_011529 | TRAF family member-associated Nf-kappa B activator(Tank)             | -2.06 |
| AF218416  | tocopherol (alpha) transfer protein(Ttpa)                            | -2.06 |
| NM_007553 | bone morphogenetic protein 2(Bmp2)                                   | -2.06 |
| NM_011239 | RAN binding protein 1(Ranbp1)                                        | -2.05 |
| BC014757  | SPRY domain containing 4(Spryd4)                                     | -2.05 |
| NM_011354 | small EDRK-rich factor 2(Serf2)                                      | -2.05 |
| AK002310  | aph1 homolog C, gamma secretase subunit(Aph1c)                       | -2.05 |
| NM_021546 | N-terminal EF-hand calcium binding protein 3(Necab3)                 | -2.05 |
| NM_012019 | apoptosis-inducing factor, mitochondrion-associated 1(Aifm1)         | -2.05 |
| NM_007895 | eosinophil-associated, ribonuclease A family, member 2(Ear2)         | -2.04 |
| AF317225  | Kruppel-like factor 15(Klf15)                                        | -2.04 |
| AK008720  | GINS complex subunit 2 (Psf2 homolog)(Gins2)                         | -2.04 |
| NM_008632 | microtubule-associated protein 2(Map2)                               | -2.04 |
| AF307844  | LIM domain and actin binding 1(Lima1)                                | -2.03 |

---

|           |                                                                        |       |
|-----------|------------------------------------------------------------------------|-------|
| AF219112  | pro-platelet basic protein(Ppbp)                                       | -2.03 |
| NM_010259 | guanylate binding protein 2b(Gbp2b)                                    | -2.03 |
| AK004440  | TAR DNA binding protein(Tardbp)                                        | -2.03 |
| NM_017466 | chemokine (C-C motif) receptor-like 2(Ccr12)                           | -2.03 |
| NM_007827 | CD55 molecule, decay accelerating factor for complement B(Cd55b)       | -2.03 |
| AB040490  | CXADR-like membrane protein(Clmp)                                      | -2.03 |
| BC013532  | chromatin assembly factor 1, subunit B (p60)(Chaf1b)                   | -2.03 |
| AK019356  | RIKEN cDNA 2900079J23 gene(2900079J23Rik)                              | -2.03 |
| NM_007510 | ATPase, H <sup>+</sup> transporting, lysosomal V1 subunit E1(Atp6v1e1) | -2.02 |
| NM_009609 | actin, gamma, cytoplasmic 1(Actg1)                                     | -2.02 |
| NM_009681 | adaptor-related protein complex 3, sigma 1 subunit(Ap3s1)              | -2.02 |
| AF023474  |                                                                        | -2.02 |
| NM_019868 | heterogeneous nuclear ribonucleoprotein H2(Hnrmph2)                    | -2.02 |
| NM_008906 | cathepsin A(Ctsa)                                                      | -2.02 |
| AF250145  | IZUMO1 receptor, JUNO(Izumo1r)                                         | -2.02 |
| NM_008822 | peroxisomal biogenesis factor 7(Pex7)                                  | -2.01 |
| NM_008241 | forkhead box G1(Foxg1)                                                 | -2.01 |
| NM_011678 | ubiquitin specific peptidase 4 (proto-oncogene)(Usp4)                  | -2.01 |
| NM_011734 | sialic acid acetyltransferase(Siae)                                    | -2.01 |
| NM_011868 | enoyl-Coenzyme A delta isomerase 2(Eci2)                               | -2.01 |
| NM_010424 | hemochromatosis(Hfe)                                                   | -2.01 |
| NM_010926 | ER membrane protein complex subunit 8(Emc8)                            | -2.01 |
| NM_009269 | serine palmitoyltransferase, long chain base subunit 1(Sptlc1)         | -2.01 |
| NM_013610 | ninjurin 1(Ninj1)                                                      | -2.00 |
| NM_007897 | early B cell factor 1(Ebf1)                                            | -2.00 |
| NM_011776 | zona pellucida glycoprotein 3(Zp3)                                     | -2.00 |
| NM_011864 | 3'-phosphoadenosine 5'-phosphosulfate synthase 2(Papss2)               | -2.00 |
| NM_020296 | RNA binding motif, single stranded interacting protein 1(Rbms1)        | -2.00 |

---

|           |                                                                                                  |       |
|-----------|--------------------------------------------------------------------------------------------------|-------|
| Y14771    | paralemmin(Palm)                                                                                 | -2.00 |
| NM_008843 | prolactin induced protein(Pip)                                                                   | -2.00 |
| AF093559  |                                                                                                  | -2.00 |
| NM_013488 | CD4 antigen(Cd4)                                                                                 | -2.00 |
| AF289539  | pescadillo ribosomal biogenesis factor 1(Pes1)                                                   | -2.00 |
| NM_011260 | regenerating islet-derived 3 gamma(Reg3g)                                                        | -1.99 |
| AK013418  | RIKEN cDNA 2410018L13 gene(2410018L13Rik)                                                        | -1.99 |
| NM_008297 | heat shock factor 2(Hsf2)                                                                        | -1.99 |
| AB041599  | mitochondrial ribosomal protein L4(Mrpl4)                                                        | -1.99 |
| NM_026449 | UDP-N-acetyl-alpha-D-galactosamine:polypeptide N-acetylgalactosaminyltransferase-like 5(Galntl5) | -1.99 |
| NM_020492 | glycine receptor, alpha 1 subunit(Glra1)                                                         | -1.99 |
| NM_010027 | D-dopachrome tautomerase(Ddt)                                                                    | -1.99 |
| NM_009652 | thymoma viral proto-oncogene 1(Akt1)                                                             | -1.98 |
| NM_009793 | calcium/calmodulin-dependent protein kinase IV(Camk4)                                            | -1.98 |
| NM_021479 |                                                                                                  | -1.98 |
| NM_007416 | adrenergic receptor, alpha 1b(Adra1b)                                                            | -1.98 |
| NM_007692 | choline kinase beta(Chkb)                                                                        | -1.98 |
| NM_020488 | gamma-aminobutyric acid (GABA) A receptor, subunit theta(Gabrq)                                  | -1.97 |
| AK015640  | N(alpha)-acetyltransferase 30, NatC catalytic subunit(Naa30)                                     | -1.97 |
| NM_010587 | intersectin 1 (SH3 domain protein 1A)(Itsn1)                                                     | -1.97 |
| NM_009285 | stanniocalcin 1(Stc1)                                                                            | -1.97 |
| AB016197  | potassium inwardly-rectifying channel, subfamily J, member 16(Kcnj16)                            | -1.97 |
| NM_007424 | aggrecan(Acan)                                                                                   | -1.97 |
| AK015407  | RIKEN cDNA 4930447J18 gene(4930447J18Rik)                                                        | -1.97 |
| NM_008117 | growth hormone(Gh)                                                                               | -1.97 |
| NM_011796 | calpain 10(Capn10)                                                                               | -1.97 |
| NM_011909 | ubiquitin specific peptidase 18(Usp18)                                                           | -1.97 |
| NM_019879 | succinate-CoA ligase, GDP-forming, alpha subunit(Suclg1)                                         | -1.97 |

---

|           |                                                                     |       |
|-----------|---------------------------------------------------------------------|-------|
| NM_010441 | high mobility group AT-hook 2(Hmga2)                                | -1.96 |
| AJ409498  |                                                                     | -1.96 |
| NM_020267 | tripartite motif-containing 44(Trim44)                              | -1.96 |
| AK015340  | complement component 8, beta polypeptide(C8b)                       | -1.96 |
| AK005964  | RIKEN cDNA 1700013M08 gene(1700013M08Rik)                           | -1.96 |
| AB042027  | FERM domain containing 4B(Frmd4b)                                   | -1.96 |
| NM_009078 | ribosomal protein L19(Rpl19)                                        | -1.96 |
| NM_010881 | nuclear receptor coactivator 1(Ncoa1)                               | -1.95 |
| AB028071  | kidney expressed gene 1(Keg1)                                       | -1.95 |
| NM_011830 | inosine 5'-phosphate dehydrogenase 2(Impdh2)                        | -1.95 |
| NM_013715 | COP9 signalosome subunit 5(Cops5)                                   | -1.94 |
| NM_013867 | breast cancer anti-estrogen resistance 3(Bcar3)                     | -1.94 |
| Z12176    |                                                                     | -1.94 |
| AK021260  | RNA binding motif protein 12 B2(Rbm12b2)                            | -1.94 |
| NM_007982 | PTK2 protein tyrosine kinase 2(Ptk2)                                | -1.94 |
| NM_007492 | aristaless related homeobox(Arx)                                    | -1.94 |
| NM_019709 | membrane-bound transcription factor peptidase, site 1(Mbtps1)       | -1.94 |
| NM_018811 | abhydrolase domain containing 2(Abhd2)                              | -1.94 |
| NM_013777 | aldo-keto reductase family 1, member C12(Akr1c12)                   | -1.94 |
| NM_007989 | forkhead box H1(Foxh1)                                              | -1.94 |
| NM_011550 | MAX-like protein X(Mlx)                                             | -1.94 |
| NM_013499 | complement component (3b/4b) receptor 1-like(Cr1l)                  | -1.93 |
| NM_009093 | ribosomal protein S29(Rps29)                                        | -1.93 |
| NM_011880 | regulator of G protein signaling 7(Rgs7)                            | -1.93 |
| U11075    | potassium inwardly-rectifying channel, subfamily J, member 4(Kcnj4) | -1.93 |
| NM_015780 | complement factor H-related 1(Cfhr1)                                | -1.93 |
| NM_011224 | muscle glycogen phosphorylase(Pygm)                                 | -1.93 |
| AF213393  | ATP-binding cassette, sub-family A (ABC1), member 8b(Abca8b)        | -1.92 |

---

|           |                                                                                     |       |
|-----------|-------------------------------------------------------------------------------------|-------|
| AF057367  | ubiquitously transcribed tetratricopeptide repeat gene, Y chromosome(Uty)           | -1.92 |
| NM_009819 | catenin (cadherin associated protein), alpha 2(Ctnna2)                              | -1.92 |
| AK003710  | RIKEN cDNA 1110014L15 gene(1110014L15Rik)                                           | -1.92 |
| NM_010740 | CD93 antigen(Cd93)                                                                  | -1.92 |
| NM_008986 | polymerase I and transcript release factor(Ptrf)                                    | -1.92 |
| NM_009079 | ribosomal protein L22(Rpl22)                                                        | -1.92 |
| AF221099  | carcinoembryonic antigen-related cell adhesion molecule 11(Ceacam11)                | -1.92 |
| NM_009197 | solute carrier family 16 (monocarboxylic acid transporters), member 2(Slc16a2)      | -1.91 |
| AK015991  | RIKEN cDNA 4930538K18 gene(4930538K18Rik)                                           | -1.91 |
| AJ250189  | ring finger protein 31(Rnf31)                                                       | -1.91 |
| NM_009575 | zinc finger protein of the cerebellum 3(Zic3)                                       | -1.91 |
| NM_017382 | RAB11A, member RAS oncogene family(Rab11a)                                          | -1.91 |
| M55181    | preproenkephalin(Penk)                                                              | -1.91 |
| NM_008026 | Friend leukemia integration 1(Flt1)                                                 | -1.91 |
| NM_008820 | peptidase D(Pepd)                                                                   | -1.91 |
| NM_010430 | hypermethylated in cancer 1(Hic1)                                                   | -1.91 |
| X75927    | ATP-binding cassette, sub-family A (ABC1), member 2(Abca2)                          | -1.90 |
| AF296075  | intraflagellar transport 122(Ift122)                                                | -1.90 |
| NM_011317 | KH domain containing, RNA binding, signal transduction associated 1(Khdrbs1)        | -1.90 |
| NM_021477 | RNA binding protein, fox-1 homolog (C. elegans) 1(Rbfox1)                           | -1.90 |
| NM_008128 | gap junction protein, beta 6(Gjb6)                                                  | -1.90 |
| NM_013457 | adducin 1 (alpha)(Add1)                                                             | -1.90 |
| AB041554  | sperm associated antigen 4(Spag4)                                                   | -1.90 |
| NM_009822 | runt-related transcription factor 1; translocated to, 1 (cyclin D-related)(Runx1t1) | -1.90 |
| NM_016981 | solute carrier family 9 (sodium/hydrogen exchanger), member 1(Slc9a1)               | -1.90 |
| NM_013756 | defensin beta 3(Defb3)                                                              | -1.90 |
| NM_016791 | nuclear factor of activated T cells, cytoplasmic, calcineurin dependent 1(Nfatc1)   | -1.90 |
| NM_019404 | arginine vasopressin receptor 2(Avpr2)                                              | -1.90 |

---

|           |                                                                                     |       |
|-----------|-------------------------------------------------------------------------------------|-------|
| NM_017475 | Ras-related GTP binding C(Rragc)                                                    | -1.90 |
| AF058955  | succinate-Coenzyme A ligase, ADP-forming, beta subunit(Sucla2)                      | -1.89 |
| AF266505  | pseudouridine synthase 3(Pus3)                                                      | -1.89 |
| AK006064  | RIKEN cDNA 1700017G19 gene(1700017G19Rik)                                           | -1.89 |
| NM_013680 | synapsin I(Syn1)                                                                    | -1.89 |
| AK014086  | golgi integral membrane protein 4(Golim4)                                           | -1.89 |
| AK014047  | lipase, endothelial(Lipg)                                                           | -1.89 |
| NM_021289 | submaxillary gland androgen regulated protein 2(Smr2)                               | -1.89 |
| AK010153  | titin(Ttn)                                                                          | -1.89 |
| D13905    | protein tyrosine phosphatase, receptor type, D(Ptprd)                               | -1.89 |
| BC002235  | trafficking protein particle complex 12(Trappc12)                                   | -1.89 |
| NM_026668 | leucine-rich repeats and IQ motif containing 4(Lrriq4)                              | -1.88 |
| NM_020574 | potassium voltage-gated channel, Isk-related subfamily, gene 3(Kcne3)               | -1.88 |
| AK009333  | SH3 and PX domains 2A(Sh3pxd2a)                                                     | -1.88 |
| NM_010276 | GTP binding protein (gene overexpressed in skeletal muscle)(Gem)                    | -1.88 |
| NM_021442 | MDS1 and EVI1 complex locus(Mecom)                                                  | -1.88 |
| NM_013699 | upstream binding protein 1(Ubp1)                                                    | -1.88 |
| NM_011397 | solute carrier family 23 (nucleobase transporters), member 1(Slc23a1)               | -1.88 |
| AK013364  | protection of telomeres 1B(Pot1b)                                                   | -1.88 |
| NM_009126 | serine (or cysteine) peptidase inhibitor, clade B (ovalbumin), member 3A(Serpinb3a) | -1.88 |
| U25109    |                                                                                     | -1.88 |
| NM_008340 | insulin-like growth factor binding protein, acid labile subunit(Igfals)             | -1.88 |
| NM_019403 | ring finger protein 5(Rnf5)                                                         | -1.88 |
| NM_018813 | cleavage and polyadenylation specificity factor 3(Cpsf3)                            | -1.88 |
| AK014259  | osteoglycin(Ogn)                                                                    | -1.87 |
| AK019586  | RIKEN cDNA 4930428D20 gene(4930428D20Rik)                                           | -1.87 |
| U07207    |                                                                                     | -1.87 |
| NM_009787 | protein disulfide isomerase associated 4(Pdia4)                                     | -1.87 |

---

|           |                                                                               |       |
|-----------|-------------------------------------------------------------------------------|-------|
| NM_011185 | proteasome (prosome, macropain) subunit, beta type 1(Psmb1)                   | -1.87 |
| NM_012035 | transient receptor potential cation channel, subfamily C, member 7(Trpc7)     | -1.87 |
| NM_007976 | coagulation factor V(F5)                                                      | -1.87 |
| NM_009997 | cytochrome P450, family 2, subfamily a, polypeptide 4(Cyp2a4)                 | -1.87 |
| NM_010247 | X-ray repair complementing defective repair in Chinese hamster cells 6(Xrcc6) | -1.87 |
| AK017992  | Wolf-Hirschhorn syndrome candidate 1 (human)(Whsc1)                           | -1.87 |
| NM_009281 | zinc finger protein 143(Zfp143)                                               | -1.87 |
| AK007294  | transformation related protein 53 target 5(Trp53tg5)                          | -1.87 |
| BC003331  | cDNA sequence BC003331(BC003331)                                              | -1.86 |
| AK008571  | RIKEN cDNA 2010315B03 gene(2010315B03Rik)                                     | -1.86 |
| L21707    | receptor-like tyrosine kinase(Ryk)                                            | -1.86 |
| D26157    | prostaglandin I receptor (IP)(Ptgir)                                          | -1.86 |
| NM_008011 | fibroblast growth factor receptor 4(Fgfr4)                                    | -1.86 |
| NM_011858 | teneurin transmembrane protein 4(Tenm4)                                       | -1.86 |
| NM_007718 | chemokine (C-C motif) receptor 1-like 1(Ccr1l1)                               | -1.86 |
| M94293    | ubiquitin specific peptidase 7(Usp7)                                          | -1.86 |
| AK019544  | maestro heat-like repeat family member 9(Mroh9)                               | -1.86 |
| U55417    |                                                                               | -1.86 |
| NM_013864 | N-myc downstream regulated gene 2(Ndrg2)                                      | -1.86 |
| NM_026010 | lipoyl(octanoyl) transferase 2 (putative)(Lipt2)                              | -1.86 |
| AF041060  | GrpE-like 2, mitochondrial(Grpel2)                                            | -1.85 |
| Z12503    |                                                                               | -1.85 |
| U57554    | melatonin receptor 1B(Mtnr1b)                                                 | -1.85 |
| NM_013459 | complement factor D (adipsin)(Cfd)                                            | -1.85 |
| AF041409  | integrin alpha 8(Itga8)                                                       | -1.85 |
| NM_008900 | POU domain, class 3, transcription factor 3(Pou3f3)                           | -1.85 |
| BC004683  | zinc finger, DHHC domain containing 8(Zdhhc8)                                 | -1.85 |
| NM_019660 | MYC binding protein(Mycbp)                                                    | -1.85 |

---

|           |                                                                               |       |
|-----------|-------------------------------------------------------------------------------|-------|
| AJ249901  | SPARC related modular calcium binding 2(Smoc2)                                | -1.85 |
| NM_007770 | cone-rod homeobox(Crx)                                                        | -1.85 |
| NM_013746 | pleckstrin homology domain containing, family B (evectins) member 1(Plekhb1)  | -1.84 |
| NM_013930 | aminoadipate-semialdehyde synthase(Aass)                                      | -1.84 |
| S74391    | PTK6 protein tyrosine kinase 6(Ptk6)                                          | -1.84 |
| AJ278461  | matrix metalloproteinase 1b (interstitial collagenase)(Mmp1b)                 | -1.84 |
| NM_007683 | centromere protein C1(Cenpc1)                                                 | -1.84 |
| NM_008205 | histocompatibility 2, M region locus 9(H2-M9)                                 | -1.84 |
| NM_007591 | calreticulin(Calr)                                                            | -1.84 |
| NM_009532 | X-ray repair complementing defective repair in Chinese hamster cells 1(Xrcc1) | -1.84 |
| AF353245  | unconventional SNARE in the ER 1 homolog (S. cerevisiae)(Use1)                | -1.84 |
| NM_011377 | single-minded homolog 2 (Drosophila)(Sim2)                                    | -1.84 |
| S72511    |                                                                               | -1.84 |
| NM_025575 | SYS1 Golgi-localized integral membrane protein homolog (S. cerevisiae)(Sys1)  | -1.84 |
| NM_011859 | odd-skipped related 1 (Drosophila)(Osr1)                                      | -1.83 |
| NM_016763 | hydroxysteroid (17-beta) dehydrogenase 10(Hsd17b10)                           | -1.83 |
| AF093699  |                                                                               | -1.83 |
| AF271360  | serine/threonine kinase 4(Stk4)                                               | -1.83 |
| AK016871  | RIKEN cDNA 4933422E07 gene(4933422E07Rik)                                     | -1.83 |
| NM_011026 | purinergic receptor P2X, ligand-gated ion channel 4(P2rx4)                    | -1.83 |
| NM_011474 | small proline-rich protein 2H(Sprr2h)                                         | -1.83 |
| X92592    | forkhead box B1(Foxb1)                                                        | -1.83 |
| AF214575  | glycine receptor, alpha 3 subunit(Glra3)                                      | -1.83 |
| AK014502  | RAN binding protein 10(Ranbp10)                                               | -1.83 |
| AF226324  | solute carrier organic anion transporter family, member 3a1(Slco3a1)          | -1.83 |
| NM_011959 | origin recognition complex, subunit 5(Orc5)                                   | -1.83 |
| AB010373  | zinc finger protein 975(Zfp975)                                               | -1.83 |
| AK006578  | RIKEN cDNA 1700031F05 gene(1700031F05Rik)                                     | -1.83 |



---

|           |                                                                   |       |
|-----------|-------------------------------------------------------------------|-------|
| AK013157  | F-box protein 21(Fbxo21)                                          | -1.82 |
| NM_008070 | gamma-aminobutyric acid (GABA) A receptor, subunit beta 2(Gabrb2) | -1.82 |
| NM_026345 | MANSC domain containing 1(Mansc1)                                 | -1.82 |
| NM_018740 | elongator acetyltransferase complex subunit 5(Elp5)               | -1.82 |
| NM_018770 | cell adhesion molecule 1(Cadm1)                                   | -1.82 |
| AF291494  |                                                                   | -1.82 |
| NM_023233 | tripartite motif-containing 13(Trim13)                            | -1.82 |
| AK016211  | RIKEN cDNA 4930563N14 gene(4930563N14Rik)                         | -1.82 |
| NM_008243 | macrophage stimulating 1 (hepatocyte growth factor-like)(Mst1)    | -1.82 |
| NM_013492 | clusterin(Clu)                                                    | -1.82 |
| NM_015810 | polymerase (DNA directed), gamma 2, accessory subunit(Polg2)      | -1.82 |
| AF278712  | allantoicase(Allc)                                                | -1.82 |
| NM_019447 | hepatocyte growth factor activator(Hgfac)                         | -1.82 |
| NM_008380 | inhibin beta-A(Inhba)                                             | -1.82 |
| AK018406  | RIKEN cDNA 8430413B15 gene(8430413B15Rik)                         | -1.82 |
| NM_016861 | PDZ and LIM domain 1 (elfin)(Pdlim1)                              | -1.82 |
| AF176528  | F-box and WD-40 domain protein 14(Fbxw14)                         | -1.82 |
| X62705    |                                                                   | -1.81 |
| NM_010419 | hairy and enhancer of split 5 (Drosophila)(Hes5)                  | -1.81 |
| NM_022030 | synaptic vesicle glycoprotein 2 a(Sv2a)                           | -1.81 |
| NM_025768 | GH regulated TBC protein 1(Grtp1)                                 | -1.81 |
| NM_009371 | transforming growth factor, beta receptor II(Tgfb2)               | -1.81 |
| NM_009011 | RAD23 homolog B, nucleotide excision repair protein(Rad23b)       | -1.81 |
| BC003350  | G protein pathway suppressor 1(Gps1)                              | -1.81 |
| U08819    | microtubule-associated protein 4(Map4)                            | -1.81 |
| NM_011261 | reelin(Rein)                                                      | -1.81 |
| NM_030253 | poly (ADP-ribose) polymerase family, member 9(Parp9)              | -1.81 |
| AJ271055  | Iroquois related homeobox 6 (Drosophila)(Irx6)                    | -1.81 |

---

|           |                                                                     |       |
|-----------|---------------------------------------------------------------------|-------|
| NM_008051 | fucosyltransferase 1(Fut1)                                          | -1.81 |
| AB010374  | zinc finger protein 738(Zfp738)                                     | -1.81 |
| AB018421  | cytochrome P450, family 4, subfamily a, polypeptide 10(Cyp4a10)     | -1.81 |
| AK007951  | trafficking protein particle complex 2(Trappc2)                     | -1.80 |
| AF089721  | smoothened, frizzled class receptor(Smo)                            | -1.80 |
| NM_009623 | adenylate cyclase 8(Adcy8)                                          | -1.80 |
| NM_011549 | transcription factor EB(Tfeb)                                       | -1.80 |
| NM_009548 | ring finger protein 112(Rnf112)                                     | -1.80 |
| NM_008426 | potassium inwardly-rectifying channel, subfamily J, member 3(Kcnj3) | -1.80 |
| NM_011812 | fibulin 5(Fbln5)                                                    | -1.80 |
| NM_007559 | bone morphogenetic protein 8b(Bmp8b)                                | -1.80 |
| AK021388  | RIKEN cDNA E130114A11 gene(E130114A11Rik)                           | -1.80 |
| NM_015732 | axin 2(Axin2)                                                       | -1.79 |
| L26238    | labial homeobox homolog (Drosophila)(Labx)                          | -1.79 |
| NM_010012 | cytochrome P450, family 8, subfamily b, polypeptide 1(Cyp8b1)       | -1.79 |
| NM_009409 | topoisomerase (DNA) II beta(Top2b)                                  | -1.79 |
| NM_015820 | heparan sulfate 6-O-sulfotransferase 3(Hs6st3)                      | -1.79 |
| NM_009771 | beta-transducin repeat containing protein(Btrc)                     | -1.79 |
| NM_010629 | kinesin-associated protein 3(Kifap3)                                | -1.79 |
| AK005303  | anaphase promoting complex subunit 10(Anapc10)                      | -1.79 |
| NM_012025 | Rac GTPase-activating protein 1(Racgap1)                            | -1.79 |
| NM_023644 | methylcrotonoyl-Coenzyme A carboxylase 1 (alpha)(Mccc1)             | -1.79 |
| D13904    | protein tyrosine phosphatase, receptor type, D(Ptprd)               | -1.79 |
| NM_007916 | DEAD (Asp-Glu-Ala-Asp) box polypeptide 19a(Ddx19a)                  | -1.79 |
| AF090373  | gamma-aminobutyric acid (GABA) A receptor, subunit alpha 4(Gabra4)  | -1.79 |
| NM_008977 | protein tyrosine phosphatase, non-receptor type 2(Ptpn2)            | -1.79 |
| AJ275988  | trans-acting transcription factor 6(Sp6)                            | -1.79 |
| AK006870  | RIKEN cDNA 1700063H06 gene(1700063H06Rik)                           | -1.79 |

---

|           |                                                                                        |       |
|-----------|----------------------------------------------------------------------------------------|-------|
| NM_018734 | guanylate binding protein 3(Gbp3)                                                      | -1.79 |
| NM_011346 | selectin, lymphocyte(Sell)                                                             | -1.78 |
| NM_009810 | caspase 3(Casp3)                                                                       | -1.78 |
| BC003957  | family with sequence similarity 131, member A(Fam131a)                                 | -1.78 |
| NM_007719 | chemokine (C-C motif) receptor 7(Ccr7)                                                 | -1.78 |
| NM_008188 | THUMP domain containing 3(Thumpd3)                                                     | -1.78 |
| AK014828  | tetratricopeptide repeat domain 6(Ttc6)                                                | -1.78 |
| AK007145  | family with sequence similarity 65, member B(Fam65b)                                   | -1.78 |
| NM_008548 | mannosidase 1, alpha(Man1a)                                                            | -1.78 |
| NM_007390 | cholinergic receptor, nicotinic, alpha polypeptide 7(Chrna7)                           | -1.78 |
| AK018520  | Rho GTPase activating protein 42(Arhgap42)                                             | -1.78 |
| NM_011791 | ash2 (absent, small, or homeotic)-like (Drosophila)(Ash2l)                             | -1.78 |
| NM_011405 | solute carrier family 7 (cationic amino acid transporter, y+ system), member 7(Slc7a7) | -1.78 |
| NM_008600 | major intrinsic protein of lens fiber(Mip)                                             | -1.78 |
| AF045562  | ATP-binding cassette, sub-family B (MDR/TAP), member 6(Abcb6)                          | -1.77 |
| AK016767  | RIKEN cDNA 4933411E02 gene(4933411E02Rik)                                              | -1.77 |
| AK020271  | RIKEN cDNA 9130201A16 gene(9130201A16Rik)                                              | -1.77 |
| NM_010176 | fumarylacetoacetate hydrolase(Fah)                                                     | -1.77 |
| NM_018774 | polyhomeotic-like 2 (Drosophila)(Phc2)                                                 | -1.77 |
| Z78162    |                                                                                        | -1.77 |
| NM_021281 | cathepsin S(Ctss)                                                                      | -1.77 |
| BC011413  | 40S ribosomal protein S20 pseudogene(Gm6607)                                           | -1.77 |
| NM_010336 | lysophosphatidic acid receptor 1(Lpar1)                                                | -1.77 |
| X56574    | retinoic acid receptor, beta(Rarb)                                                     | -1.77 |
| M93663    |                                                                                        | -1.77 |
| NM_019687 | solute carrier family 22 (organic cation transporter), member 4(Slc22a4)               | -1.76 |
| U92454    | WW domain binding protein 5(Wbp5)                                                      | -1.76 |
| AF270495  | adenosine deaminase, RNA-specific, B2(Adarb2)                                          | -1.76 |

---

|           |                                                                                        |       |
|-----------|----------------------------------------------------------------------------------------|-------|
| AK019795  | PRAME family member 12(Pramef12)                                                       | -1.76 |
| NM_010516 | cysteine rich protein 61(Cyr61)                                                        | -1.76 |
| AK019493  |                                                                                        | -1.76 |
| NM_007513 | solute carrier family 7 (cationic amino acid transporter, y+ system), member 1(Slc7a1) | -1.76 |
| NM_010219 | FK506 binding protein 4(Fkbp4)                                                         | -1.76 |
| U01139    | LTV1 ribosome biogenesis factor(Ltv1)                                                  | -1.76 |
| AB010361  | zinc finger protein 160(Zfp160)                                                        | -1.75 |
| X16670    |                                                                                        | -1.75 |
| AB036341  |                                                                                        | -1.75 |
| AK006388  | family with sequence similarity 217, member A(Fam217a)                                 | -1.75 |
| AK021288  | S phase cyclin A-associated protein in the ER(Scaper)                                  | -1.75 |
| NM_010488 | ELAV (embryonic lethal, abnormal vision, Drosophila)-like 4 (Hu antigen D)(Elavl4)     | -1.75 |
| NM_010847 | MAX interactor 1, dimerization protein(Mxi1)                                           | -1.75 |
| NM_011116 | phospholipase D family, member 3(Pld3)                                                 | -1.75 |
| NM_008615 | malic enzyme 1, NADP(+)-dependent, cytosolic(Me1)                                      | -1.75 |
| M97864    |                                                                                        | -1.75 |
| M36880    |                                                                                        | -1.75 |
| NM_019822 | adhesion regulating molecule 1(Adrm1)                                                  | -1.75 |
| M28513    | zinc finger protein 58(Zfp58)                                                          | -1.75 |
| NM_009678 | adaptor protein complex AP-1, mu 2 subunit(Ap1m2)                                      | -1.75 |
| L17069    | lysine (K)-specific methyltransferase 2A(Kmt2a)                                        | -1.75 |
| X75536    |                                                                                        | -1.75 |
| AK007799  |                                                                                        | -1.74 |
| NM_021331 | glucose-6-phosphatase, catalytic, 2(G6pc2)                                             | -1.74 |
| AF112300  | LEM domain containing 3(Lemd3)                                                         | -1.74 |
| NM_008664 | myomesin 2(Myom2)                                                                      | -1.74 |
| NM_018874 | pancreatic lipase related protein 1(Pnliprp1)                                          | -1.74 |
| NM_008288 | hydroxysteroid 11-beta dehydrogenase 1(Hsd11b1)                                        | -1.74 |

---

|           |                                                               |       |
|-----------|---------------------------------------------------------------|-------|
| NM_008825 | 6-phosphofructo-2-kinase/fructose-2,6-biphosphatase 2(Pfkfb2) | -1.74 |
| AF036898  | polymerase (DNA directed), epsilon 2 (p59 subunit)(Pole2)     | -1.74 |
| NM_007462 | adenomatosis polyposis coli(Apc)                              | -1.74 |
| NM_010937 | neuroblastoma ras oncogene(Nras)                              | -1.74 |
| NM_010024 | dopachrome tautomerase(Dct)                                   | -1.74 |
| NM_007846 | defensin, alpha, related sequence 12(Defa-rs12)               | -1.74 |
| AF242319  | centrosomal protein 70(Cep70)                                 | -1.73 |
| NM_009134 | sodium channel, voltage-gated, type X, alpha(Scn10a)          | -1.73 |
| M91458    | sterol carrier protein 2, liver(Scp2)                         | -1.73 |
| X62895    |                                                               | -1.73 |
| NM_007927 | emerin(Emd)                                                   | -1.73 |
| NM_007534 | B cell leukemia/lymphoma 2 related protein A1b(Bcl2a1b)       | -1.73 |
| AF263743  | ErbB2 interacting protein(Erbin)                              | -1.73 |
| AJ250689  |                                                               | -1.73 |
| NM_009557 | zinc finger protein 46(Zfp46)                                 | -1.73 |
| AF118273  | cDNA sequence BC018473(BC018473)                              | -1.73 |
| X02676    |                                                               | -1.73 |
| AF093261  | homer scaffolding protein 3(Homer3)                           | -1.73 |
| AL355704  | high mobility group 20A(Hmg20a)                               | -1.73 |
| NM_020522 |                                                               | -1.73 |
| NM_010149 | erythropoietin receptor(Epor)                                 | -1.73 |
| X89693    | olfactory receptor 242(Olfr242)                               | -1.73 |
| AF373410  | CD209c antigen(Cd209c)                                        | -1.73 |
| AK003894  | glycosyltransferase 8 domain containing 2(Glt8d2)             | -1.73 |
| AK020088  | RIKEN cDNA 6030498E09 gene(6030498E09Rik)                     | -1.72 |
| AK013656  | RIKEN cDNA 2900046H12 gene(2900046H12Rik)                     | -1.72 |
| AF158744  | prolactin family8, subfamily a, member 9(Prl8a9)              | -1.72 |
| NM_009278 | Sjogren syndrome antigen B(Ssb)                               | -1.72 |

---

|           |                                                                                                       |       |
|-----------|-------------------------------------------------------------------------------------------------------|-------|
| NM_009036 | recombination signal binding protein for immunoglobulin kappa J region-like(Rbpjl)                    | -1.72 |
| NM_008235 | hairy and enhancer of split 1 (Drosophila)(Hes1)                                                      | -1.72 |
| NM_008653 | myosin binding protein C, cardiac(Mybpc3)                                                             | -1.72 |
| AB035383  | ADP-ribosylation factor-like 6 interacting protein 4(Arl6ip4)                                         | -1.72 |
| NM_018862 | 1-acylglycerol-3-phosphate O-acyltransferase 1 (lysophosphatidic acid acyltransferase, alpha)(Agpat1) | -1.72 |
| AF290473  | nudE neurodevelopment protein 1(Nde1)                                                                 | -1.72 |
| NM_009163 | sphingosine phosphate lyase 1(Sgpl1)                                                                  | -1.72 |
| NM_013881 | unc-51 like kinase 2(Ulk2)                                                                            | -1.72 |
| NM_016909 | translin-associated factor X(Tsnax)                                                                   | -1.72 |
| AK007084  | RIKEN cDNA 1700095J12 gene(1700095J12Rik)                                                             | -1.72 |
| NM_011978 | solute carrier family 27 (fatty acid transporter), member 2(Slc27a2)                                  | -1.72 |
| NM_019791 | melanoma antigen, family D, 1(Maged1)                                                                 | -1.72 |
| NM_011935 | estrogen-related receptor gamma(Esrrg)                                                                | -1.72 |
| BC004586  |                                                                                                       | -1.72 |
| NM_008599 | chemokine (C-X-C motif) ligand 9(Cxcl9)                                                               | -1.72 |
| AK013968  | RIKEN cDNA 3110001N23 gene(3110001N23Rik)                                                             | -1.72 |
| AF154337  | G protein-coupled receptor 137B, pseudogene(Gpr137b-ps)                                               | -1.71 |
| AJ276690  | B-box and SPRY domain containing(Bspry)                                                               | -1.71 |
| M12052    | CD8 antigen, alpha chain(Cd8a)                                                                        | -1.71 |
| NM_009198 | solute carrier family 17 (sodium phosphate), member 1(Slc17a1)                                        | -1.71 |
| AJ293727  | kyphoscoliosis peptidase(Ky)                                                                          | -1.71 |
| NM_016882 | squamous cell carcinoma antigen recognized by T cells 1(Sart1)                                        | -1.71 |
| NM_008678 | nuclear receptor coactivator 2(Ncoa2)                                                                 | -1.71 |
| Y11356    | apolipoprotein H(Apoh)                                                                                | -1.71 |
| M55697    |                                                                                                       | -1.71 |
| AF237669  | ral guanine nucleotide dissociation stimulator-like 3(Rgl3)                                           | -1.71 |
| NM_007446 | amylase 1, salivary(Amy1)                                                                             | -1.71 |
| NM_008408 | STT3, subunit of the oligosaccharyltransferase complex, homolog A (S. cerevisiae)(Stt3a)              | -1.70 |

---

|           |                                                                                  |       |
|-----------|----------------------------------------------------------------------------------|-------|
| NM_009099 | tripartite motif-containing 30A(Trim30a)                                         | -1.70 |
| NM_011835 | katanin p60 (ATPase-containing) subunit A1(Katna1)                               | -1.70 |
| AK015442  | RIKEN cDNA 4930451G09 gene(4930451G09Rik)                                        | -1.70 |
| AJ249492  | interleukin 10-related T cell-derived inducible factor beta(Iltifb)              | -1.70 |
| NM_021543 | protocadherin 8(Pcdh8)                                                           | -1.70 |
| NM_011596 | ATPase, H <sup>+</sup> transporting, lysosomal V0 subunit A2(Atp6v0a2)           | -1.70 |
| Y17851    | ganglioside-induced differentiation-associated-protein 2(Gdap2)                  | -1.70 |
| NM_007905 | polyhomeotic-like 1 (Drosophila)(Phc1)                                           | -1.70 |
| AF282280  |                                                                                  | -1.70 |
| NM_011717 | widely-interspaced zinc finger motifs(Wiz)                                       | -1.70 |
| D45212    | protein tyrosine phosphatase, receptor type, J(Ptprj)                            | -1.70 |
| AJ010223  | dystrobrevin, beta(Dtnb)                                                         | -1.70 |
| NM_008264 | homeobox A13(Hoxa13)                                                             | -1.70 |
| NM_019697 | potassium voltage-gated channel, Shal-related family, member 2(Kcnd2)            | -1.70 |
| AB010369  | zinc finger protein 868(Zfp868)                                                  | -1.70 |
| M30432    |                                                                                  | -1.70 |
| AB010370  | predicted gene, 17449(Gm17449)                                                   | -1.69 |
| NM_010780 | chymase 1, mast cell(Cma1)                                                       | -1.69 |
| NM_013790 | ATP-binding cassette, sub-family C (CFTR/MRP), member 5(Abcc5)                   | -1.69 |
| AF399754  | NADPH oxidase organizer 1(Noxo1)                                                 | -1.69 |
| NM_013730 | signaling lymphocytic activation molecule family member 1(Slamf1)                | -1.69 |
| M94299    |                                                                                  | -1.69 |
| NM_016771 | sulfotransferase family 1D, member 1(Sult1d1)                                    | -1.69 |
| AF022804  | phospholipase C, beta 4(Plcb4)                                                   | -1.69 |
| NM_009727 | ATPase, aminophospholipid transporter (APLT), class I, type 8A, member 1(Atp8a1) | -1.69 |
| AK016170  | thyroid hormone receptor interactor 4(Trip4)                                     | -1.69 |
| NM_007794 |                                                                                  | -1.69 |
| X63927    |                                                                                  | -1.69 |

---

|           |                                                                                           |       |
|-----------|-------------------------------------------------------------------------------------------|-------|
| NM_013731 | serum/glucocorticoid regulated kinase 2(Sgk2)                                             | -1.69 |
| AK004106  | RIKEN cDNA 1110035D15 gene(1110035D15Rik)                                                 | -1.69 |
| BC005561  | cDNA sequence BC005561(BC005561)                                                          | -1.69 |
| NM_009056 | regulatory factor X, 2 (influences HLA class II expression)(Rfx2)                         | -1.69 |
| NM_020046 | dihydroorotate dehydrogenase(Dhodh)                                                       | -1.69 |
| L06451    | nonagouti(a)                                                                              | -1.69 |
| BC005577  | GTPase, IMAP family member 4(Gimap4)                                                      | -1.69 |
| AF078869  | solute carrier family 22 (organic anion transporter), member 8(Slc22a8)                   | -1.69 |
| AF287893  | golgi associated PDZ and coiled-coil motif containing(Gopc)                               | -1.69 |
| NM_013646 | RAR-related orphan receptor alpha(Rora)                                                   | -1.68 |
| NM_013655 | chemokine (C-X-C motif) ligand 12(Cxcl12)                                                 | -1.68 |
| NM_015763 | lipin 1(Lpin1)                                                                            | -1.68 |
| AK016528  | RIKEN cDNA 4932416J16 gene(4932416J16Rik)                                                 | -1.68 |
| AF232828  | neuro-oncological ventral antigen 1(Nova1)                                                | -1.68 |
| AF072794  |                                                                                           | -1.68 |
| NM_007615 | catenin (cadherin associated protein), delta 1(Ctnnd1)                                    | -1.68 |
| NM_007961 | ets variant 6(Etv6)                                                                       | -1.68 |
| NM_009461 | ubiquitin protein ligase E3 component n-recognin 1(Ubr1)                                  | -1.68 |
| NM_008428 | potassium inwardly-rectifying channel, subfamily J, member 8(Kcnj8)                       | -1.68 |
| U49723    |                                                                                           | -1.68 |
| NM_019797 | thyroid hormone receptor interactor 4(Trip4)                                              | -1.68 |
| BC025873  | phosphatase and actin regulator 1(Phactr1)                                                | -1.68 |
| AF295105  | ryanodine receptor 2, cardiac(Ryr2)                                                       | -1.68 |
| NM_010757 | v-maf musculoaponeurotic fibrosarcoma oncogene family, protein K (avian)(Mafk)            | -1.68 |
| NM_009200 | solute carrier family 1 (high affinity aspartate/glutamate transporter), member 6(Slc1a6) | -1.68 |
| AF194028  | histidine-rich glycoprotein(Hrg)                                                          | -1.68 |
| NM_008061 | glucose-6-phosphatase, catalytic(G6pc)                                                    | -1.67 |
| AJ250103  |                                                                                           | -1.67 |



---

|           |                                                                                                    |       |
|-----------|----------------------------------------------------------------------------------------------------|-------|
| NM_011070 | prefoldin 2(Pfdn2)                                                                                 | -1.67 |
| AK016935  | RIKEN cDNA 4933426K07 gene(4933426K07Rik)                                                          | -1.67 |
| AK009375  | CD300 molecule like family member G(Cd300lg)                                                       | -1.67 |
| M61046    |                                                                                                    | -1.67 |
| AK003561  | FCF1 rRNA processing protein(Fcf1)                                                                 | -1.67 |
| NM_019561 | endosulfine alpha(Ensa)                                                                            | -1.67 |
| NM_010455 | homeobox A7(Hoxa7)                                                                                 | -1.67 |
| NM_009536 | tyrosine 3-monooxygenase/tryptophan 5-monooxygenase activation protein, epsilon polypeptide(Ywhae) | -1.67 |
| NM_018877 | SET domain, bifurcated 1(Setdb1)                                                                   | -1.67 |
| NM_029693 | RIKEN cDNA 1700123K08 gene(1700123K08Rik)                                                          | -1.67 |
| AJ132681  |                                                                                                    | -1.67 |
| AB048947  | synaptotagmin XIII(Syt13)                                                                          | -1.67 |
| NM_025853 | DSN1 homolog, MIS12 kinetochore complex component(Dsn1)                                            | -1.67 |
| NM_008379 | karyopherin (importin) beta 1(Kpnb1)                                                               | -1.67 |
| AK008234  | glucosaminyl (N-acetyl) transferase 3, mucin type(Gcnt3)                                           | -1.66 |
| NM_010241 | thymoma viral proto-oncogene 1 interacting protein(Aktip)                                          | -1.66 |
| U55594    |                                                                                                    | -1.66 |
| AK018615  | intestine specific homeobox(Isx)                                                                   | -1.66 |
| NM_007796 | cytotoxic T lymphocyte-associated protein 2 alpha(Ctla2a)                                          | -1.66 |
| NM_009217 | somatostatin receptor 2(Sstr2)                                                                     | -1.66 |
| NM_007552 | Bmi1 polycomb ring finger oncogene(Bmi1)                                                           | -1.66 |
| NM_010088 | prolactin family 8, subfamily a, member 2(Pr18a2)                                                  | -1.66 |
| Z12527    |                                                                                                    | -1.66 |
| AJ278462  | matrix metalloproteinase 1a (interstitial collagenase)(Mmp1a)                                      | -1.66 |
| AK011562  | RIKEN cDNA C330021F23 gene(C330021F23Rik)                                                          | -1.66 |
| AJ132673  |                                                                                                    | -1.66 |
| NM_019665 | ADP-ribosylation factor-like 6(Arl6)                                                               | -1.66 |
| NM_025968 | prostaglandin reductase 1(Ptgr1)                                                                   | -1.66 |

---

|           |                                                                         |       |
|-----------|-------------------------------------------------------------------------|-------|
| NM_007526 | BarH-like homeobox 1(Barx1)                                             | -1.66 |
| AF297220  | glia maturation factor, beta(Gmfb)                                      | -1.66 |
| AF051947  | calcium channel, voltage-dependent, T type, alpha 1H subunit(Cacna1h)   | -1.65 |
| AK020281  | membrane bound O-acyltransferase domain containing 1(Mboat1)            | -1.65 |
| NM_008302 | heat shock protein 90 alpha (cytosolic), class B member 1(Hsp90ab1)     | -1.65 |
| NM_007440 | arachidonate 12-lipoxygenase(Alox12)                                    | -1.65 |
| AF200357  | pantothenate kinase 1(Pank1)                                            | -1.65 |
| L34052    |                                                                         | -1.65 |
| NM_008681 | N-myc downstream regulated gene 1(Ndrp1)                                | -1.65 |
| AF272844  | secretoglobulin, family 2B, member 20(Scgb2b20)                         | -1.65 |
| Z12550    |                                                                         | -1.65 |
| AK021246  | RIKEN cDNA C430039J01 gene(C430039J01Rik)                               | -1.65 |
| AK006238  | RIKEN cDNA 1700022F17 gene(1700022F17Rik)                               | -1.65 |
| NM_008593 | forkhead box D2(Foxd2)                                                  | -1.65 |
| AK005141  | phosphoinositide-3-kinase interacting protein 1(Pik3ip1)                | -1.65 |
| AF294617  | 6-phosphofructo-2-kinase/fructose-2,6-biphosphatase 3(Pfkfb3)           | -1.65 |
| NM_011668 | ubiquitin protein ligase E3A(Ube3a)                                     | -1.65 |
| NM_019873 | FK506 binding protein-like(Fkbp1)                                       | -1.65 |
| NM_009184 | PTK6 protein tyrosine kinase 6(Ptk6)                                    | -1.65 |
| NM_019963 | signal transducer and activator of transcription 2(Stat2)               | -1.64 |
| NM_010146 | epilepsy, progressive myoclonic epilepsy, type 2 gene alpha(Epm2a)      | -1.64 |
| AF029746  |                                                                         | -1.64 |
| U37883    | immunoglobulin kappa variable 4-53(Igkv4-53)                            | -1.64 |
| NM_009844 | CD19 antigen(Cd19)                                                      | -1.64 |
| AF155354  | ankyrin repeat and SOCS box-containing 3(Asb3)                          | -1.64 |
| NM_019481 | solute carrier family 13 (sodium/sulfate symporters), member 1(Slc13a1) | -1.64 |
| NM_029460 | vomeroneasal 2, receptor, pseudogene 54(Vmn2r-ps54)                     | -1.64 |
| AK019605  |                                                                         | -1.64 |

---

|           |                                                                                  |       |
|-----------|----------------------------------------------------------------------------------|-------|
| AK004966  | leucine rich repeat containing 3(Lrrc3)                                          | -1.64 |
| X15684    | solute carrier family 2 (facilitated glucose transporter), member 2(Slc2a2)      | -1.64 |
| NM_019736 | acyl-CoA thioesterase 9(Acot9)                                                   | -1.64 |
| NM_009512 | solute carrier family 27 (fatty acid transporter), member 5(Slc27a5)             | -1.64 |
| NM_015783 | ISG15 ubiquitin-like modifier(Isg15)                                             | -1.64 |
| AK016329  | RIKEN cDNA 4930579K19 gene(4930579K19Rik)                                        | -1.64 |
| AK016541  | RIKEN cDNA 4932432N04 gene(4932432N04Rik)                                        | -1.64 |
| AF073882  | myotubularin related protein 7(Mttr7)                                            | -1.64 |
| AF283667  | phosphoglycerate mutase 1(Pgam1)                                                 | -1.63 |
| NM_011331 | chemokine (C-C motif) ligand 12(Ccl12)                                           | -1.63 |
| NM_008665 | myelin transcription factor 1(Myt1)                                              | -1.63 |
| NM_008042 | formyl peptide receptor 3(Fpr3)                                                  | -1.63 |
| NM_009139 | chemokine (C-C motif) ligand 6(Ccl6)                                             | -1.63 |
| NM_019398 | ribonuclease, RNase A family, 2B (liver, eosinophil-derived neurotoxin)(Rnase2b) | -1.63 |
| AF159256  | RAN, member RAS oncogene family(Ran)                                             | -1.63 |
| NM_026949 | CCR4-NOT transcription complex, subunit 8(Cnot8)                                 | -1.63 |
| X02568    |                                                                                  | -1.63 |
| NM_009077 | ribosomal protein L18(Rpl18)                                                     | -1.63 |
| D90225    | pleiotrophin(Ptn)                                                                | -1.63 |
| Z22043    |                                                                                  | -1.63 |
| NM_019814 | HIG1 domain family, member 1A(Higd1a)                                            | -1.63 |
| NM_008791 | Purkinje cell protein 4(Pcp4)                                                    | -1.63 |
| NM_009215 | somatostatin(Sst)                                                                | -1.63 |
| NM_011820 | gamma-glutamyltransferase 5(Ggt5)                                                | -1.63 |
| X99994    |                                                                                  | -1.63 |
| AJ278829  | pyroglutamyl-peptidase I(Pgpep1)                                                 | -1.63 |
| NM_011271 | ribonuclease, RNase A family, 1 (pancreatic)(Rnase1)                             | -1.63 |
| NM_020583 | interferon-stimulated protein(Isg20)                                             | -1.63 |

---

|           |                                                                                                 |       |
|-----------|-------------------------------------------------------------------------------------------------|-------|
| NM_007469 | apolipoprotein C-I(Apoc1)                                                                       | -1.62 |
| NM_021273 | creatine kinase, brain(Ckb)                                                                     | -1.62 |
| NM_013842 | X-box binding protein 1(Xbp1)                                                                   | -1.62 |
| AF304306  | hydroxysteroid (17-beta) dehydrogenase 11(Hsd17b11)                                             | -1.62 |
| NM_007515 | solute carrier family 7 (cationic amino acid transporter, y+ system), member 3(Slc7a3)          | -1.62 |
| AF162224  | angiopoietin-like 3(Angptl3)                                                                    | -1.62 |
| NM_008942 | aminopeptidase puromycin sensitive(Npepps)                                                      | -1.62 |
| AB024499  | zinc finger homeodomain 4(Zfhx4)                                                                | -1.62 |
| NM_009530 | alpha thalassemia/mental retardation syndrome X-linked(Atrx)                                    | -1.62 |
| NM_009119 | Sin3-associated polypeptide 18(Sap18)                                                           | -1.62 |
| AK014147  | RIKEN cDNA 3110039I08 gene(3110039I08Rik)                                                       | -1.62 |
| NM_011676 | unc-119 lipid binding chaperone(Unc119)                                                         | -1.62 |
| NM_021554 | methyltransferase like 9(Mettl9)                                                                | -1.62 |
| AK013702  |                                                                                                 | -1.62 |
|           | SWI/SNF related, matrix associated, actin dependent regulator of chromatin, subfamily c, member |       |
| NM_009211 | 1(Smarcc1)                                                                                      | -1.62 |
| NM_007427 | agouti related neuropeptide(Agrp)                                                               | -1.62 |
| L20509    | chaperonin containing Tcp1, subunit 3 (gamma)(Cct3)                                             | -1.62 |
| AF367759  | syntrophin, gamma 1(Sntg1)                                                                      | -1.62 |
| NM_011125 | phospholipid transfer protein(Pltp)                                                             | -1.62 |
| NM_025746 | RIKEN cDNA 4933415F23 gene(4933415F23Rik)                                                       | -1.61 |
| NM_013771 | YME1-like 1 (S. cerevisiae)(Yme1l1)                                                             | -1.61 |
| NM_009716 | activating transcription factor 4(Atf4)                                                         | -1.61 |
| AB064489  |                                                                                                 | -1.61 |
| BC015275  | retinoic acid receptor responder (tazarotene induced) 2(Rarres2)                                | -1.61 |
| NM_009973 | casein alpha s2-like B(Csn1s2b)                                                                 | -1.61 |
| AK015561  | neurolysin (metallopeptidase M3 family)(Nln)                                                    | -1.61 |
| U26225    |                                                                                                 | -1.61 |

---

|           |                                                                                            |       |
|-----------|--------------------------------------------------------------------------------------------|-------|
| NM_026011 | ADP-ribosylation factor-like 8B(Arl8b)                                                     | -1.61 |
| NM_011925 | adhesion G protein-coupled receptor E5(Adgre5)                                             | -1.61 |
| NM_009509 | villin 1(Vil1)                                                                             | -1.61 |
| AK020780  | Yip1 domain family, member 6(Yipf6)                                                        | -1.60 |
| NM_018784 | ST3 beta-galactoside alpha-2,3-sialyltransferase 6(St3gal6)                                | -1.60 |
| AK018453  | RIKEN cDNA 8430432A02 gene(8430432A02Rik)                                                  | -1.60 |
| U63146    | retinol binding protein 4, plasma(Rbp4)                                                    | -1.60 |
| NM_008764 | tumor necrosis factor receptor superfamily, member 11b (osteoprotegerin)(Tnfrsf11b)        | -1.60 |
| NM_010722 | lamin B2(Lmnb2)                                                                            | -1.60 |
| NM_010565 | inhibin beta-C(Inhbc)                                                                      | -1.60 |
| NM_012007 | cathepsin J(Ctsj)                                                                          | -1.60 |
| NM_008091 | GATA binding protein 3(Gata3)                                                              | -1.60 |
| AK008356  | RIKEN cDNA 2010109A12 gene(2010109A12Rik)                                                  | -1.60 |
| NM_023431 | melanoma associated antigen (mutated) 1(Mum1)                                              | -1.60 |
| NM_016881 | phosphomannomutase 2(Pmm2)                                                                 | -1.60 |
| NM_009145 | neuroplastin(Nptn)                                                                         | -1.60 |
| NM_013905 | hairy/enhancer-of-split related with YRPW motif-like(Heyl)                                 | -1.60 |
| NM_021542 | potassium channel, subfamily K, member 5(Kcnk5)                                            | -1.60 |
| NM_013750 | pleckstrin homology like domain, family A, member 3(Phlda3)                                | -1.60 |
| AK013790  | integrator complex subunit 6(Ints6)                                                        | -1.60 |
| NM_007460 | adaptor-related protein complex 3, delta 1 subunit(Ap3d1)                                  | -1.60 |
| NM_025467 | gastrokine 2(Gkn2)                                                                         | -1.60 |
| NM_011135 | CCR4-NOT transcription complex, subunit 7(Cnot7)                                           | -1.60 |
| AK011682  | RIKEN cDNA 2610035D17 gene(2610035D17Rik)                                                  | -1.60 |
| AF321300  | fibroblast growth factor receptor-like 1(Fgfr1)                                            | -1.60 |
| U49723    | guanylate cyclase 2c(Gucy2c)                                                               | -1.60 |
| NM_013814 | UDP-N-acetyl-alpha-D-galactosamine:polypeptide N-acetylgalactosaminyltransferase 1(Galnt1) | -1.60 |
| M92419    | stefin A3(Stfa3)                                                                           | -1.59 |

---

|           |                                                                       |       |
|-----------|-----------------------------------------------------------------------|-------|
| Z12195    |                                                                       | -1.59 |
| NM_015740 | biogenesis of lysosomal organelles complex-1, subunit 1(Bloc1s1)      | -1.59 |
| M19904    |                                                                       | -1.59 |
| AB027128  | polymerase (DNA directed), eta (RAD 30 related)(Polh)                 | -1.59 |
| AF156890  | growth differentiation factor 2(Gdf2)                                 | -1.59 |
| U48737    | pre-mRNA processing factor 4B(Prpf4b)                                 | -1.59 |
| AK006705  | Rpgrip1-like(Rpgrip1l)                                                | -1.59 |
| NM_011544 | transcription factor 12(Tcf12)                                        | -1.59 |
| AK019706  | listerin E3 ubiquitin protein ligase 1(Ltn1)                          | -1.59 |
| NM_009841 | CD14 antigen(Cd14)                                                    | -1.59 |
| AY013774  | protocadherin beta 13(Pcdhb13)                                        | -1.59 |
| NM_019715 | potassium channel modulatory factor 1(Kcmf1)                          | -1.58 |
| AI153368  |                                                                       | -1.58 |
| D10627    | zinc finger protein 930(Zfp930)                                       | -1.58 |
| X83590    | ribosomal protein L5(Rpl5)                                            | -1.58 |
| AF015213  | Ig heavy chain Mem5-like(LOC641025)                                   | -1.58 |
| AK016446  | RIKEN cDNA 4931409D07 gene(4931409D07Rik)                             | -1.58 |
| NM_013601 | msh homeobox 2(Msx2)                                                  | -1.58 |
| M57975    | calcium channel, voltage-dependent, L type, alpha 1D subunit(Cacna1d) | -1.58 |
| AK017406  | zinc finger and BTB domain containing 21(Zbtb21)                      | -1.58 |
| NM_012018 | centriolin(Cntrl)                                                     | -1.58 |
| AF128260  |                                                                       | -1.58 |
| D12487    | choline acetyltransferase(Chat)                                       | -1.58 |
| NM_010822 | N-methylpurine-DNA glycosylase(Mpg)                                   | -1.58 |
| AF190449  | AF4/FMR2 family, member 4(Aff4)                                       | -1.58 |
| AK005839  | RIKEN cDNA 1700010K24 gene(1700010K24Rik)                             | -1.57 |
| AK014458  | zinc finger and BTB domain containing 9(Zbtb9)                        | -1.57 |
| NM_008002 | fibroblast growth factor 10(Fgf10)                                    | -1.57 |

---

|           |                                                                                     |       |
|-----------|-------------------------------------------------------------------------------------|-------|
| NM_008788 | procollagen C-endopeptidase enhancer protein(Pcolce)                                | -1.57 |
| NM_010581 | CD47 antigen (Rh-related antigen, integrin-associated signal transducer)(Cd47)      | -1.57 |
| NM_020610 | nuclear receptor interacting protein 3(Nrip3)                                       | -1.57 |
| AF291492  |                                                                                     | -1.57 |
| AB059428  | acyl-CoA synthetase medium-chain family member 1(Acsm1)                             | -1.57 |
| NM_007966 | even-skipped homeobox 1(Evx1)                                                       | -1.57 |
| NM_008779 | contactin 3(Cntn3)                                                                  | -1.57 |
| NM_008301 | heat shock protein 2(Hspa2)                                                         | -1.57 |
| NM_020025 | UDP-Gal:betaGlcNAc beta 1,3-galactosyltransferase, polypeptide 2(B3galt2)           | -1.57 |
| NM_015779 | elastase, neutrophil expressed(Elane)                                               | -1.57 |
| AF305211  | solute carrier family 28 (sodium-coupled nucleoside transporter), member 3(Slc28a3) | -1.57 |
| AB033759  | solute carrier family 4, sodium bicarbonate cotransporter-like, member 10(Slc4a10)  | -1.57 |
| M11943    | wingless-type MMTV integration site family, member 1(Wnt1)                          | -1.57 |
| NM_008182 | glutathione S-transferase, alpha 2 (Yc2)(Gsta2)                                     | -1.57 |
| NM_011551 | upstream binding transcription factor, RNA polymerase I(Ubtf)                       | -1.57 |
| AF204959  | cytochrome P450, family 3, subfamily a, polypeptide 25(Cyp3a25)                     | -1.57 |
| NM_013671 | superoxide dismutase 2, mitochondrial(Sod2)                                         | -1.57 |
| NM_007753 | carboxypeptidase A3, mast cell(Cpa3)                                                | -1.57 |
| NM_010191 | farnesyl diphosphate farnesyl transferase 1(Fdft1)                                  | -1.57 |
| AB010353  | zinc finger with KRAB and SCAN domains 3(Zkscan3)                                   | -1.57 |
| NM_009825 | serine (or cysteine) peptidase inhibitor, clade H, member 1(Serpinh1)               | -1.57 |
| NM_009017 | retinoic acid early transcript beta(Raet1b)                                         | -1.57 |
| AF145716  | schwannomin interacting protein 1(Schip1)                                           | -1.57 |
| AK005920  | synaptophysin-like 2(Sypl2)                                                         | -1.57 |
| U49951    | mitogen-activated protein kinase kinase kinase 19(Map3k19)                          | -1.57 |
| NM_027205 |                                                                                     | -1.57 |
| NM_013599 | matrix metalloproteinase 9(Mmp9)                                                    | -1.56 |
| NM_011877 | protein tyrosine phosphatase, non-receptor type 21(Ptpn21)                          | -1.56 |

---

|           |                                                                                                |       |
|-----------|------------------------------------------------------------------------------------------------|-------|
| AK010935  | cysteine and glycine-rich protein 2 binding protein(Csrp2bp)                                   | -1.56 |
| NM_010023 | enoyl-Coenzyme A delta isomerase 1(Eci1)                                                       | -1.56 |
| AK015582  | RIKEN cDNA 4930477O15 gene(4930477O15Rik)                                                      | -1.56 |
| NM_007602 | calpain 5(Capn5)                                                                               | -1.56 |
| NM_019514 | astrotactin 2(Astn2)                                                                           | -1.56 |
| U55504    |                                                                                                | -1.56 |
| AJ235939  |                                                                                                | -1.56 |
| NM_031192 | renin 1 structural(Ren1)                                                                       | -1.56 |
| NM_009152 | sema domain, immunoglobulin domain (Ig), short basic domain, secreted, (semaphorin) 3A(Sema3a) | -1.56 |
| AF223576  | nuclear transcription factor, X-box binding 1(Nfx1)                                            | -1.56 |
| U51459    |                                                                                                | -1.56 |
| NM_026634 | RIKEN cDNA A930018P22 gene(A930018P22Rik)                                                      | -1.56 |
| NM_010281 | gamma-glutamyl hydrolase(Ggh)                                                                  | -1.56 |
| NM_009231 | son of sevenless homolog 1 (Drosophila)(Sos1)                                                  | -1.56 |
| NM_010412 | histone deacetylase 5(Hdac5)                                                                   | -1.56 |
| NM_010451 | homeobox A2(Hoxa2)                                                                             | -1.56 |
| NM_009014 | RAD51 paralog B(Rad51b)                                                                        | -1.56 |
| X65010    |                                                                                                | -1.56 |
| NM_009802 | carbonic anhydrase 6(Car6)                                                                     | -1.56 |
| NM_021340 | retinal G protein coupled receptor(Rgr)                                                        | -1.55 |
| NM_008674 | N-acetyltransferase 3(Nat3)                                                                    | -1.55 |
| NM_013552 | hyaluronan mediated motility receptor (RHAMM)(Hmnr)                                            | -1.55 |
| NM_021313 | ring finger protein 25(Rnf25)                                                                  | -1.55 |
| NM_013591 | mucosal vascular addressin cell adhesion molecule 1(Madcam1)                                   | -1.55 |
| NM_010170 | coagulation factor II (thrombin) receptor-like 2(F2rl2)                                        | -1.55 |
| NM_010670 | keratin associated protein 12-1(Krtap12-1)                                                     | -1.55 |
| NM_008054 | Fyn proto-oncogene(Fyn)                                                                        | -1.55 |
| NM_021499 | WD repeat containing, antisense to Trp73(Wrap73)                                               | -1.55 |



---

|           |                                                                                |       |
|-----------|--------------------------------------------------------------------------------|-------|
| AB041656  | SS nuclear autoantigen 1(Ssna1)                                                | -1.55 |
| AF123386  | zinc finger, MYND domain containing 10(Zmynd10)                                | -1.55 |
| AJ409505  |                                                                                | -1.55 |
| NM_009885 | carboxyl ester lipase(Cel)                                                     | -1.55 |
| AJ400622  | transmembrane protein with EGF-like and two follistatin-like domains 1(Tmeff1) | -1.55 |
| NM_016775 | DnaJ heat shock protein family (Hsp40) member C5(Dnajc5)                       | -1.55 |
| NM_011703 | vasoactive intestinal peptide receptor 1(Vipr1)                                | -1.55 |
| AB047557  | DEAH (Asp-Glu-Ala-His) box polypeptide 30(Dhx30)                               | -1.55 |
| D45850    | aldo-keto reductase family 1, member C6(Akr1c6)                                | -1.55 |
| NM_020260 | Rho GTPase activating protein 31(Arhgap31)                                     | -1.55 |
| AF111166  | ryanodine receptor 3(Ryr3)                                                     | -1.55 |
| AF361939  | chymase 2, mast cell(Cma2)                                                     | -1.55 |
| U89741    |                                                                                | -1.55 |
| M28730    | tubulin, beta 4A class IVA(Tubb4a)                                             | -1.55 |
| NM_008313 | 5 hydroxytryptamine (serotonin) receptor 4(Htr4)                               | -1.55 |
| AK008000  | alkaline phosphatase, intestinal(Alpi)                                         | -1.55 |
| NM_021607 | nicastatin(Ncstn)                                                              | -1.55 |
| AK020244  | chromodomain helicase DNA binding protein 9(Chd9)                              | -1.55 |
| NM_011294 | SUB1 homolog (S. cerevisiae)(Sub1)                                             | -1.54 |
| NM_026108 | haloacid dehalogenase-like hydrolase domain containing 1A(Hdhd1a)              | -1.54 |
| NM_009063 | regulator of G-protein signaling 5(Rgs5)                                       | -1.54 |
| NM_020013 | fibroblast growth factor 21(Fgf21)                                             | -1.54 |
| NM_009182 | ST8 alpha-N-acetyl-neuraminide alpha-2,8-sialyltransferase 3(St8sia3)          | -1.54 |
| AK015104  | RIKEN cDNA 4930406D14 gene(4930406D14Rik)                                      | -1.54 |
| D00622    | low density lipoprotein receptor-related protein associated protein 1(Lrpap1)  | -1.54 |
| AF289487  | aspartate-beta-hydroxylase(Asph)                                               | -1.54 |
| AF059259  |                                                                                | -1.54 |
| AK015905  | RIKEN cDNA 4930526L06 gene(4930526L06Rik)                                      | -1.54 |

---

|           |                                                                                   |       |
|-----------|-----------------------------------------------------------------------------------|-------|
| NM_013912 | apelin(Apln)                                                                      | -1.54 |
| NM_009295 | syntaxin binding protein 1(Stxbp1)                                                | -1.54 |
| Z12414    |                                                                                   | -1.54 |
| AK020681  | phosphatase and actin regulator 1(Phactr1)                                        | -1.54 |
| AK002441  | transmembrane protein 254c(Tmem254c, b, a)                                        | -1.54 |
| NM_008236 | hairy and enhancer of split 2 (Drosophila)(Hes2)                                  | -1.54 |
| NM_019721 | methyltransferase like 3(Mettl3)                                                  | -1.53 |
| NM_009320 | solute carrier family 6 (neurotransmitter transporter, taurine), member 6(Slc6a6) | -1.53 |
| AK017759  | neuron-derived neurotrophic factor(Ndnf)                                          | -1.53 |
| BC005638  | family with sequence similarity 220, member A(Fam220a)                            | -1.53 |
| AF133734  |                                                                                   | -1.53 |
| AK005419  | cytochrome b-561 domain containing 1(Cyb561d1)                                    | -1.53 |
| AB010363  | regulator of sex-limitation candidate 18(Rslcn18)                                 | -1.53 |
| NM_008225 | hematopoietic cell specific Lyn substrate 1(Hcls1)                                | -1.53 |
| J04847    | DNA segment, Chr 1, Pasteur Institute 1(D1Pas1)                                   | -1.53 |
| NM_008419 |                                                                                   | -1.53 |
| AF144397  | carnitine O-octanoyltransferase(Crot)                                             | -1.53 |
| AK005772  | t-complex 11 family, X-linked 2(Tcp11x2)                                          | -1.53 |
| NM_016671 | interleukin 27 receptor, alpha(Il27ra)                                            | -1.53 |
| NM_008244 | HGF-regulated tyrosine kinase substrate(Hgs)                                      | -1.53 |
| AF220156  |                                                                                   | -1.52 |
| NM_010761 | cyclin D-type binding-protein 1(Ccndbp1)                                          | -1.52 |
| AK012657  | ectonucleoside triphosphate diphosphohydrolase 7(Entpd7)                          | -1.52 |
| BC006187  | cartilage intermediate layer protein 2(Cilp2)                                     | -1.52 |
| X68884    | orthodenticle homeobox 2(Otx2)                                                    | -1.52 |
| AK011476  | mitochondrial ribosomal protein S30(Mrps30)                                       | -1.52 |
| AF054819  | killer cell lectin-like receptor subfamily K, member 1(Klrk1)                     | -1.52 |
| NM_011731 | solute carrier family 6 (neurotransmitter transporter), member 20B(Slc6a20b)      | -1.52 |

---

|           |                                                                                              |       |
|-----------|----------------------------------------------------------------------------------------------|-------|
| AJ307017  | ubiquitin specific peptidase 9, Y chromosome(Usp9y)                                          | -1.52 |
| AJ238004  | protein kinase, X-linked(Prkx)                                                               | -1.52 |
| L11333    | carboxylesterase 3A(Ces3a)                                                                   | -1.52 |
| NM_007860 | deiodinase, iodothyronine, type I(Dio1)                                                      | -1.52 |
| NM_007781 | colony stimulating factor 2 receptor, beta 2, low-affinity (granulocyte-macrophage)(Csf2rb2) | -1.52 |
| NM_013705 | zinc finger protein 30(Zfp30)                                                                | -1.52 |
| AK018334  |                                                                                              | -1.52 |
| AB010364  | zinc finger protein 748(Zfp748)                                                              | -1.52 |
| Z78147    |                                                                                              | -1.51 |
| AF131197  | Eph receptor A1(Epha1)                                                                       | -1.51 |
| NM_029583 |                                                                                              | -1.51 |
| AK006998  | RIKEN cDNA 1700084M22 gene(1700084M22Rik)                                                    | -1.51 |
| NM_012061 | Ca <sup>2+</sup> -dependent secretion activator(Cadps)                                       | -1.51 |
| NM_028186 | naked cuticle 2 homolog (Drosophila)(Nkd2)                                                   | -1.51 |
| D50060    | proprotein convertase subtilisin/kexin type 6(Pcsk6)                                         | -1.51 |
| NM_020575 | membrane-associated ring finger (C3HC4) 7(March7)                                            | -1.51 |
| D87521    | protein kinase, DNA activated, catalytic polypeptide(Prkdc)                                  | -1.51 |
| X90884    |                                                                                              | -1.51 |
| NM_019922 | cartilage associated protein(Crtap)                                                          | -1.51 |
| AK005003  | PX domain containing 1(Pxdc1)                                                                | -1.51 |
| NM_009298 | surfeit gene 6(Surf6)                                                                        | -1.51 |
| NM_009900 | chloride channel, voltage-sensitive 2(Clcn2)                                                 | -1.51 |
| NM_011960 | poly (ADP-ribose) glycohydrolase(Parg)                                                       | -1.51 |
| NM_016889 | insulinoma-associated 1(Insm1)                                                               | -1.51 |
| BC002228  |                                                                                              | -1.51 |
| NM_019547 | RNA binding motif protein 38(Rbm38)                                                          | -1.51 |
| NM_008998 | RAB17, member RAS oncogene family(Rab17)                                                     | -1.50 |
| M93980    | ribosomal protein L10(Rpl10)                                                                 | -1.50 |

---

|           |                                                                                |       |
|-----------|--------------------------------------------------------------------------------|-------|
| NM_008804 | phosphodiesterase 9A(Pde9a)                                                    | -1.50 |
| X80464    |                                                                                | -1.50 |
| D50389    |                                                                                | -1.50 |
| X17165    |                                                                                | -1.50 |
| NM_031389 | NLR family, pyrin domain containing 4C(Nlrp4c)                                 | -1.50 |
| NM_007662 | cadherin 15(Cdh15)                                                             | -1.50 |
| M92378    | solute carrier family 6 (neurotransmitter transporter, GABA), member 1(Slc6a1) | -1.50 |
| AK014834  | thioesterase superfamily member 4(Them4)                                       | 1.5   |
| NM_018873 | SRC kinase signaling inhibitor 1(Srcin1)                                       | 1.5   |
| NM_030713 | zinc finger protein 202(Zfp202)                                                | 1.5   |
| Z12520    |                                                                                | 1.5   |
| AF309132  |                                                                                | 1.5   |
| AK017147  | RIKEN cDNA 5033403F01 gene(5033403F01Rik)                                      | 1.5   |
| NM_031166 | inhibitor of DNA binding 4(Id4)                                                | 1.5   |
| AK019098  | RIKEN cDNA 2310063J23 gene(2310063J23Rik)                                      | 1.5   |
| AK016058  |                                                                                | 1.5   |
| NM_013621 | olfactory receptor 69(Olfr69)                                                  | 1.5   |
| BC005511  | tubulin tyrosine ligase(Ttl)                                                   | 1.5   |
| Z22132    |                                                                                | 1.5   |
| AK015753  | WD repeat domain 64(Wdr64)                                                     | 1.5   |
| AK016943  | predicted gene 9757(Gm9757)                                                    | 1.5   |
| NM_020609 | cDNA sequence BC051019(BC051019)                                               | 1.5   |
| NM_011189 | proteasome (prosome, macropain) activator subunit 1 (PA28 alpha)(Psme1)        | 1.5   |
| NM_012017 | zinc finger protein 346(Zfp346)                                                | 1.5   |
| BC006747  | Rho guanine nucleotide exchange factor (GEF) 10-like(Arhgef10l)                | 1.5   |
| AK020182  | zinc finger and BTB domain containing 20(Zbtb20)                               | 1.5   |
| NM_008679 | nuclear receptor coactivator 3(Ncoa3)                                          | 1.5   |
| AF050423  |                                                                                | 1.5   |

---

|           |                                                                  |     |
|-----------|------------------------------------------------------------------|-----|
| AK018143  | cingulin(Cgn)                                                    | 1.5 |
| BC004773  | tetratricopeptide repeat domain 30A1(Ttc30a1)                    | 1.5 |
| AK015443  | RIKEN cDNA 4930451G21 gene(4930451G21Rik)                        | 1.5 |
| X79788    |                                                                  | 1.5 |
| NM_024171 | Sec61 beta subunit(Sec61b)                                       | 1.5 |
| AK019760  | methylcrotonoyl-Coenzyme A carboxylase 2 (beta)(Mccc2)           | 1.5 |
| AB036742  | ectopic ossification 1(Etos1)                                    | 1.5 |
| AJ279852  |                                                                  | 1.5 |
| AK012199  | zinc finger, HIT domain containing 1(Znhit1)                     | 1.5 |
| AJ005844  | tenascin R(Tnr)                                                  | 1.5 |
| AK006257  | single-pass membrane protein with coiled-coil domains 2(Smco2)   | 1.5 |
| AK007181  | transmembrane protein 165(Tmem165)                               | 1.5 |
| AK004394  | LRRN4 C-terminal like(Lrrn4cl)                                   | 1.5 |
| NM_022884 | betaine-homocysteine methyltransferase 2(Bhmt2)                  | 1.5 |
| AK016863  | RIKEN cDNA 4933421H12 gene(4933421H12Rik)                        | 1.5 |
| NM_015784 | periostin, osteoblast specific factor(Postn)                     | 1.5 |
| AK017148  | RIKEN cDNA 5033403H07 gene(5033403H07Rik)                        | 1.5 |
| U26230    |                                                                  | 1.5 |
| AK020239  | RIKEN cDNA 8530402H02 gene(8530402H02Rik)                        | 1.5 |
| AK020409  | T-box 20(Tbx20)                                                  | 1.5 |
| AK003907  | RIKEN cDNA 1110021P09 gene(1110021P09Rik)                        | 1.5 |
| AY030275  | nucleolar protein interacting with the FHA domain of MKI67(Nifk) | 1.5 |
| BC008239  | t-complex 11 (mouse) like 2(Tcp11l2)                             | 1.5 |
| AJ278735  | coenzyme Q8A(Coq8a)                                              | 1.5 |
| M34857    | homeobox B9(Hoxb9)                                               | 1.5 |
| Z12294    |                                                                  | 1.5 |
| NM_021716 | fidgetin(Fign)                                                   | 1.5 |
| NM_016718 | ninjurin 2(Ninj2)                                                | 1.5 |

---

|           |                                                           |     |
|-----------|-----------------------------------------------------------|-----|
| NM_021393 | negative elongation factor complex member B(Nelfb)        | 1.5 |
| AK020911  | KN motif and ankyrin repeat domains 1(Kank1)              | 1.5 |
| NM_026656 | mucolipin 2(Mcoln2)                                       | 1.5 |
| AF269248  | hemogen(Hemgn)                                            | 1.5 |
| AK006015  | RIKEN cDNA 1700016C19 gene(1700016C19Rik)                 | 1.5 |
| AK015307  | RIKEN cDNA 4930434B07 gene(4930434B07Rik)                 | 1.5 |
| BC006944  | ectonucleotide pyrophosphatase/phosphodiesterase 3(Enpp3) | 1.5 |
| X66903    | filamin binding LIM protein 1(Fblim1)                     | 1.5 |
| AF316989  |                                                           | 1.5 |
| AJ308965  | PC4 and SFRS1 interacting protein 1(Psip1)                | 1.5 |
| AK016646  | AT hook containing transcription factor 1(Ahctf1)         | 1.5 |
| AK003416  | integrin alpha V(Itgav)                                   | 1.5 |
| Z25469    | protein S (alpha)(Pros1)                                  | 1.5 |
| AY042192  | MAS-related GPR, member A2B(Mrgpra2b)                     | 1.5 |
| AK016032  | RIKEN cDNA 4930543N07 gene(4930543N07Rik)                 | 1.5 |
| BC008101  | RAS-like, family 11, member B(Rasl11b)                    | 1.5 |
| AK013479  | RIKEN cDNA 2900003A17 gene(2900003A17Rik)                 | 1.5 |
| AK019578  | CUGBP, Elav-like family member 3(Celf3)                   | 1.5 |
| NM_025695 | structural maintenance of chromosomes 6(Smc6)             | 1.5 |
| AK020397  | interleukin-1 receptor-associated kinase 4(Irak4)         | 1.5 |
| AK014129  | RIKEN cDNA 3110037B15 gene(3110037B15Rik)                 | 1.5 |
| AK018267  | mediator complex subunit 13-like(Med13l)                  | 1.5 |
| AF001866  |                                                           | 1.5 |
| AK011345  | family with sequence similarity 64, member A(Fam64a)      | 1.5 |
| L23164    |                                                           | 1.5 |
| AK006623  | RIKEN cDNA 1700037J18 gene(1700037J18Rik)                 | 1.5 |
| NM_024255 | hydroxysteroid dehydrogenase like 2(Hsd12)                | 1.5 |
| AK012983  | CDC42 small effector 2(Cdc42se2)                          | 1.5 |

---

|           |                                                                                          |     |
|-----------|------------------------------------------------------------------------------------------|-----|
| AK017720  | RIKEN cDNA 5730492I20 gene(5730492I20Rik)                                                | 1.5 |
| AK015197  | protein tyrosine phosphatase, receptor type, N polypeptide 2(Ptprn2)                     | 1.5 |
| NM_024268 |                                                                                          | 1.5 |
| AK020359  | fetal and adult testis expressed 1(Fate1)                                                | 1.5 |
| AK017241  | RIKEN cDNA 5330417C22 gene(5330417C22Rik)                                                | 1.5 |
| NM_016673 | ciliary neurotrophic factor receptor(Cntfr)                                              | 1.5 |
| AK014856  |                                                                                          | 1.5 |
| Z12403    |                                                                                          | 1.5 |
| NM_018733 | sodium channel, voltage-gated, type I, alpha(Scn1a)                                      | 1.5 |
| AF286212  | armadillo repeat gene deleted in velo-cardio-facial syndrome(Arvcf)                      | 1.5 |
| AK008081  | solute carrier protein 52, member 2(Slc52a2)                                             | 1.5 |
| BC006682  | eukaryotic translation initiation factor 2, subunit 3, structural gene X-linked(Eif2s3x) | 1.5 |
| AK007576  | RIKEN cDNA 1810021M19 gene(1810021M19Rik)                                                | 1.5 |
| AK003278  | solute carrier family 46, member 1(Slc46a1)                                              | 1.5 |
| AK019635  | RIKEN cDNA 4930459L07 gene(4930459L07Rik)                                                | 1.5 |
| AF290967  |                                                                                          | 1.5 |
| NM_030687 | solute carrier organic anion transporter family, member 1a4(Slco1a4)                     | 1.5 |
| BC003937  | erythrocyte membrane protein band 4.1 like 5(Epb41l5)                                    | 1.5 |
| AJ231227  |                                                                                          | 1.5 |
| U28769    |                                                                                          | 1.5 |
| AK005451  | endogenous retroviral sequence 3(Erv3)                                                   | 1.5 |
| NM_030697 | KN motif and ankyrin repeat domains 3(Kank3)                                             | 1.5 |
| BC005528  | TRAF-interacting protein with forkhead-associated domain, family member B(Tifab)         | 1.5 |
| NM_018867 | carboxypeptidase X 2 (M14 family)(Cpxm2)                                                 | 1.5 |
| AK019642  | RIKEN cDNA 4930471C04 gene(4930471C04Rik)                                                | 1.5 |
| AK012412  | RIKEN cDNA 2700052C19 gene(2700052C19Rik)                                                | 1.5 |
| AK013447  | RIKEN cDNA 2810487C13 gene(2810487C13Rik)                                                | 1.5 |
| AK006094  | RIKEN cDNA 1700018M17 gene(1700018M17Rik)                                                | 1.5 |

---

|           |                                                                                                                                                     |     |
|-----------|-----------------------------------------------------------------------------------------------------------------------------------------------------|-----|
| AK005974  | RIKEN cDNA 1700014D04 gene(1700014D04Rik)                                                                                                           | 1.5 |
| Z12248    |                                                                                                                                                     | 1.5 |
| AK020556  | RIKEN cDNA 9530014B07 gene(9530014B07Rik)                                                                                                           | 1.5 |
| U55496    |                                                                                                                                                     | 1.5 |
| NM_008612 | menage a trois 1(Mnat1)                                                                                                                             | 1.5 |
| AJ231226  |                                                                                                                                                     | 1.5 |
| NM_013661 | sema domain, seven thrombospondin repeats (type 1 and type 1-like), transmembrane domain (TM) and short cytoplasmic domain, (semaphorin) 5B(Sema5b) | 1.5 |
| M94302    |                                                                                                                                                     | 1.5 |
| K02245    | prolactin family 2, subfamily c, member 2(Prl2c2)                                                                                                   | 1.5 |
| NM_025934 | RIO kinase 2 (yeast)(Riok2)                                                                                                                         | 1.5 |
| AK020718  | RIKEN cDNA A230106O10 gene(A230106O10Rik)                                                                                                           | 1.5 |
| U55681    |                                                                                                                                                     | 1.5 |
| AK006689  | RIKEN cDNA 1700042O05 gene(1700042O05Rik)                                                                                                           | 1.5 |
| NM_011433 |                                                                                                                                                     | 1.5 |
| NM_019865 | ribosomal protein L36A(Rpl36a)                                                                                                                      | 1.5 |
| AK018440  | abl-interactor 2(Abi2)                                                                                                                              | 1.5 |
| BC004717  | unc-45 myosin chaperone A(Unc45a)                                                                                                                   | 1.5 |
| AK009156  | TEN1 telomerase capping complex subunit(Ten1)                                                                                                       | 1.5 |
| AK014159  | RIKEN cDNA 3110040K02 gene(3110040K02Rik)                                                                                                           | 1.6 |
| AF052218  |                                                                                                                                                     | 1.6 |
| U26768    |                                                                                                                                                     | 1.6 |
| AF240178  |                                                                                                                                                     | 1.6 |
| NM_025578 | mitochondrial ribosomal protein S25(Mrps25)                                                                                                         | 1.6 |
| AK006362  | RIKEN cDNA 1700025O08 gene(1700025O08Rik)                                                                                                           | 1.6 |
| BC011428  | UDP-N-acetyl-alpha-D-galactosamine:polypeptide N-acetylgalactosaminyltransferase 11(Galnt11)                                                        | 1.6 |
| AB059656  | nephronectin(Npnt)                                                                                                                                  | 1.6 |
| Y13554    |                                                                                                                                                     | 1.6 |



---

|           |                                                                          |     |
|-----------|--------------------------------------------------------------------------|-----|
| AK006219  | RIKEN cDNA 1700021L22 gene(1700021L22Rik)                                | 1.6 |
| M92328    |                                                                          | 1.6 |
| AK010539  | Luc7-like(Luc7l)                                                         | 1.6 |
| AK020646  | lysine (K)-specific methyltransferase 2E(Kmt2e)                          | 1.6 |
| NM_011856 | teneurin transmembrane protein 2(Tenm2)                                  | 1.6 |
| NM_013627 | paired box 6(Pax6)                                                       | 1.6 |
| BC002137  | cytochrome C oxidase assembly factor 5(Coa5)                             | 1.6 |
| NM_023907 | forkhead box I1(Foxi1)                                                   | 1.6 |
| AK008825  | Fas associated factor family member 2(Faf2)                              | 1.6 |
| AK004130  | neurexophilin 4(Nxph4)                                                   | 1.6 |
| NM_008490 | lecithin cholesterol acyltransferase(Lcat)                               | 1.6 |
| AK015957  | RIKEN cDNA 4930533L02 gene(4930533L02Rik)                                | 1.6 |
| AK019788  | syntaxin binding protein 5 (tomosyn)(Stxbp5)                             | 1.6 |
| BC004051  |                                                                          | 1.6 |
| AK018099  | RIKEN cDNA 6230426I18 gene(6230426I18Rik)                                | 1.6 |
| AK016117  | RIKEN cDNA 4930554G03 gene(4930554G03Rik)                                | 1.6 |
| AK014380  | PHD finger protein 19(Phf19)                                             | 1.6 |
| NM_008526 |                                                                          | 1.6 |
| AK012244  | RIKEN cDNA 3300002A11 gene(3300002A11Rik)                                | 1.6 |
| NM_025520 | LSM5 homolog, U6 small nuclear RNA and mRNA degradation associated(Lsm5) | 1.6 |
| AK020589  | CSA-conditional, T cell activation-dependent protein(Cstad)              | 1.6 |
| NM_019474 | olfactory receptor 156(Olfr156)                                          | 1.6 |
| U06945    |                                                                          | 1.6 |
| AA733351  |                                                                          | 1.6 |
| AK007391  | ubiquitin protein ligase E3 component n-recognin 4(Ubr4)                 | 1.6 |
| NM_023133 | ribosomal protein S19(Rps19)                                             | 1.6 |
| NM_013594 | methyl-CpG binding domain protein 1(Mbd1)                                | 1.6 |
| AK012172  | coiled-coil domain containing 25(Ccdc25)                                 | 1.6 |

---

|           |                                                               |     |
|-----------|---------------------------------------------------------------|-----|
| AJ297131  |                                                               | 1.6 |
| AK014890  | REST corepressor 3(Rcor3)                                     | 1.6 |
| AK015180  | RIKEN cDNA 4930422I22 gene(4930422I22Rik)                     | 1.6 |
| M76131    | eukaryotic translation elongation factor 2(Eef2)              | 1.6 |
| AK020125  | RIKEN cDNA 6720454L07 gene(6720454L07Rik)                     | 1.6 |
| AK007237  | RIKEN cDNA 1700122E12 gene(1700122E12Rik)                     | 1.6 |
| Z18961    | SRY (sex determining region Y)-box 12(Sox12)                  | 1.6 |
| L11065    | opioid receptor, kappa 1(Oprk1)                               | 1.6 |
| BC003265  |                                                               | 1.6 |
| AK013430  | RIKEN cDNA 2810481J17 gene(2810481J17Rik)                     | 1.6 |
| AK015576  | RIKEN cDNA 4930474M22 gene(4930474M22Rik)                     | 1.6 |
| AK006840  | THO complex 5(Thoc5)                                          | 1.6 |
| NM_013669 | synaptosomal-associated protein 91(Snap91)                    | 1.6 |
| AK019602  | RIKEN cDNA 4930439D14 gene(4930439D14Rik)                     | 1.6 |
| AK013716  | pluripotency-associated noncoding transcript 1(Panct1)        | 1.6 |
| AK019439  | RIKEN cDNA 3110062M04 gene(3110062M04Rik)                     | 1.6 |
| AK007683  | C1q and tumor necrosis factor related protein 2(C1qtnf2)      | 1.6 |
| AK018998  | thymosin beta 15a(Tmsb15a)                                    | 1.6 |
| NM_026454 | ubiquitin-conjugating enzyme E2F (putative)(Ube2f)            | 1.6 |
| BC006859  | scribbled planar cell polarity(Scrib)                         | 1.6 |
| AK020637  | RIKEN cDNA 9530071P10 gene(9530071P10Rik)                     | 1.6 |
| AF143541  | CD55 molecule, decay accelerating factor for complement(Cd55) | 1.6 |
| AK013809  | RIKEN cDNA 2900082C11 gene(2900082C11Rik)                     | 1.6 |
| AK006699  | RIKEN cDNA 1700045I11 gene(1700045I11Rik)                     | 1.6 |
| L41881    | immunoglobulin kappa variable 6-20(Igkv6-20)                  | 1.6 |
| AF018262  | protein phosphatase 5, catalytic subunit(Ppp5c)               | 1.6 |
| AK016369  | testis expressed 26(Tex26)                                    | 1.6 |
| AK019103  | RIKEN cDNA 2400006E01 gene(2400006E01Rik)                     | 1.6 |

---

|           |                                                           |     |
|-----------|-----------------------------------------------------------|-----|
| AK016849  | transformed mouse 3T3 cell double minute 4(Mdm4)          | 1.6 |
| AK003661  | zinc finger, FYVE domain containing 21(Zfyve21)           | 1.6 |
| AK003555  | shugoshin-like 2a (S. pombe)(Sgol2a)                      | 1.6 |
| NM_028311 |                                                           | 1.6 |
| AK015134  | leucine rich repeat containing 52(Lrrc52)                 | 1.6 |
| NM_009016 | retinoic acid early transcript 1, alpha(Raet1a)           | 1.6 |
| AK011986  | zinc finger protein 979(Zfp979)                           | 1.6 |
| AK007964  | choline phosphotransferase 1(Chpt1)                       | 1.6 |
| AK021124  | dopamine receptor D1(Drd1)                                | 1.6 |
| NM_028218 |                                                           | 1.6 |
| BC007151  | NOP2 nucleolar protein(Nop2)                              | 1.6 |
| X80424    | FAD-dependent oxidoreductase domain containing 1(Foxred1) | 1.6 |
| AK011997  | RIKEN cDNA 2610306M01 gene(2610306M01Rik)                 | 1.6 |
| AK019750  | RIKEN cDNA 4930548G05 gene(4930548G05Rik)                 | 1.6 |
| AK007988  | cadherin-related family member 5(Cdhr5)                   | 1.6 |
| NM_030724 | uridine-cytidine kinase 2(Uck2)                           | 1.6 |
| AY030406  | PAK1 interacting protein 1(Pak1ip1)                       | 1.6 |
| AK020727  | prune homolog 2(Prune2)                                   | 1.6 |
| BC015299  | adenylate cyclase 4(Adcy4)                                | 1.6 |
| AK019688  | RIKEN cDNA 4930520K02 gene(4930520K02Rik)                 | 1.6 |
| AK003613  | transmembrane p24 trafficking protein 4(Tmed4)            | 1.6 |
| NM_016766 | microspherule protein 1(Mcrs1)                            | 1.6 |
| NM_010922 | mitochondrial ribosomal protein L40(Mrpl40)               | 1.6 |
| Z68183    | thymoma viral proto-oncogene 1 interacting protein(Aktip) | 1.6 |
| AK018729  | RIKEN cDNA 0610008J02 gene(0610008J02Rik)                 | 1.6 |
| BB258473  |                                                           | 1.6 |
| NM_021428 | dexamethasone-induced transcript(Dexi)                    | 1.6 |
| NM_013643 | protein tyrosine phosphatase, non-receptor type 5(Ptpn5)  | 1.6 |

---

|           |                                                                      |     |
|-----------|----------------------------------------------------------------------|-----|
| AK007096  | RIKEN cDNA 1700069L16 gene(1700069L16Rik)                            | 1.6 |
| Y11811    |                                                                      | 1.6 |
| AK014466  | kelch-like 28(Klhl28)                                                | 1.6 |
| AK018741  | AAR2 splicing factor homolog(Aar2)                                   | 1.6 |
| NM_025605 | late endosomal/lysosomal adaptor, MAPK and MTOR activator 1(Lamtor1) | 1.6 |
| AK020060  | pellino 3(Peli3)                                                     | 1.6 |
| X83886    | vesicle-associated membrane protein 1(Vamp1)                         | 1.6 |
| AK015734  | RIKEN cDNA 4930509E22 gene(4930509E22Rik)                            | 1.6 |
| AF317900  | lactamase, beta(Lactb)                                               | 1.6 |
| AK016270  | RIKEN cDNA 4930430F08 gene(4930430F08Rik)                            | 1.6 |
| AK012914  | leucine rich repeat protein 1, neuronal(Lrrn1)                       | 1.6 |
| AK015974  | RIKEN cDNA 4930535B17 gene(4930535B17Rik)                            | 1.6 |
| AK007305  | RIKEN cDNA 1700128A07 gene(1700128A07Rik)                            | 1.6 |
| AK020860  | RIKEN cDNA A930015D03 gene(A930015D03Rik)                            | 1.6 |
| BC002251  | phosphoserine phosphatase(Psph)                                      | 1.6 |
| NM_028513 | actin-related protein T2(Actrt2)                                     | 1.6 |
| U21448    |                                                                      | 1.6 |
| AK016442  | RIKEN cDNA 4931407J08 gene(4931407J08Rik)                            | 1.6 |
| AK005229  | mitochondrial ribosomal protein S28(Mrps28)                          | 1.6 |
| AK013951  | protein phosphatase 4, regulatory subunit 1(Ppp4r1)                  | 1.6 |
| AK004153  | guanylyl cyclase domain containing 1(Gucd1)                          | 1.6 |
| BC004768  | Holliday junction recognition protein(Hjurp)                         | 1.6 |
| BC006733  | WW, C2 and coiled-coil domain containing 1(Wwc1)                     | 1.6 |
| AF012171  |                                                                      | 1.6 |
| AK019053  | predicted gene 15247(Gm15247)                                        | 1.6 |
| X51847    |                                                                      | 1.6 |
| AK014964  | SLAIN motif family, member 1, opposite strand(Slain1os)              | 1.6 |
| AK010113  | RIKEN cDNA 2310068J16 gene(2310068J16Rik)                            | 1.6 |

---

|           |                                                                                              |     |
|-----------|----------------------------------------------------------------------------------------------|-----|
| AK006096  | major facilitator superfamily domain containing 2A(Mfsd2a)                                   | 1.6 |
| AK013843  | RIKEN cDNA 2900092N22 gene(2900092N22Rik)                                                    | 1.6 |
| NM_019464 | SH3-domain GRB2-like B1 (endophilin)(Sh3glb1)                                                | 1.6 |
| NM_010672 | keratin associated protein 6-1(Krtap6-1)                                                     | 1.6 |
| AK018053  | RIKEN cDNA 5830474E16 gene(5830474E16Rik)                                                    | 1.6 |
| M27754    |                                                                                              | 1.6 |
| NM_021505 | anaphase-promoting complex subunit 5(Anapc5)                                                 | 1.6 |
| NM_025315 | mediator complex subunit 21(Med21)                                                           | 1.6 |
| U07950    | guanosine diphosphate (GDP) dissociation inhibitor 1(Gdi1)                                   | 1.6 |
| NM_026321 | family with sequence similarity 174, member A(Fam174a)                                       | 1.6 |
| AK020865  | RIKEN cDNA A930015P04 gene(A930015P04Rik)                                                    | 1.6 |
| AY042193  | MAS-related GPR, member A3(Mrgpra3)                                                          | 1.6 |
| AK021005  | AT rich interactive domain 1B (SWI-like)(Arid1b)                                             | 1.6 |
| U88067    |                                                                                              | 1.6 |
| AK004346  | amylo-1,6-glucosidase, 4-alpha-glucanotransferase(Agl)                                       | 1.6 |
| NM_007432 | alkaline phosphatase 3, intestine, not Mn requiring(Akp3)                                    | 1.6 |
| AK012323  |                                                                                              | 1.6 |
| AK006767  | amyotrophic lateral sclerosis 2 (juvenile) chromosome region, candidate 11 (human)(Als2cr11) | 1.6 |
| AK006822  | RIKEN cDNA 1700057D03 gene(1700057D03Rik)                                                    | 1.6 |
| NM_009421 | TNF receptor-associated factor 1(Traf1)                                                      | 1.6 |
| AK004319  | ELOVL family member 5, elongation of long chain fatty acids (yeast)(Elovl5)                  | 1.6 |
| AK010031  | suppressor of cytokine signaling 7(Socs7)                                                    | 1.6 |
| AK004111  | RIKEN cDNA 1110035H17 gene(1110035H17Rik)                                                    | 1.6 |
| AK015932  | RIKEN cDNA 4930529F21 gene(4930529F21Rik)                                                    | 1.6 |
| AK015998  | RIKEN cDNA 4930563I02 gene(4930563I02Rik)                                                    | 1.6 |
| AK007284  | RIKEN cDNA 1700125M20 gene(1700125M20Rik)                                                    | 1.6 |
| AK015066  | RIKEN cDNA 4930403L11 gene(4930403L11Rik)                                                    | 1.6 |
| AK005628  | RIKEN cDNA 1700003E16 gene(1700003E16Rik)                                                    | 1.6 |

---

|           |                                                                                                 |     |
|-----------|-------------------------------------------------------------------------------------------------|-----|
| AK018572  | RIKEN cDNA 9030624G23 gene(9030624G23Rik)                                                       | 1.6 |
| NM_007787 |                                                                                                 | 1.6 |
| AF294825  |                                                                                                 | 1.6 |
| NM_026531 | apoptosis enhancing nuclease(Aen)                                                               | 1.6 |
| AK020519  | RIKEN cDNA 9430092D12 gene(9430092D12Rik)                                                       | 1.6 |
| Z12477    |                                                                                                 | 1.6 |
| AK006900  | RIKEN cDNA 1700066B19 gene(1700066B19Rik)                                                       | 1.6 |
| AK021240  | RIKEN cDNA C430014O12 gene(C430014O12Rik)                                                       | 1.6 |
| NM_010232 | flavin containing monooxygenase 5(Fmo5)                                                         | 1.6 |
| NM_009238 | SRY (sex determining region Y)-box 4(Sox4)                                                      | 1.6 |
| NM_026096 | huntingtin interacting protein M(Hypm)                                                          | 1.6 |
| AF041891  |                                                                                                 | 1.6 |
| AK018176  | serine/arginine-rich splicing factor 1(Srsf1)                                                   | 1.6 |
| NM_010150 | nuclear receptor subfamily 2, group F, member 6(Nr2f6)                                          | 1.6 |
| AK020378  | RIKEN cDNA 9330161L09 gene(9330161L09Rik)                                                       | 1.6 |
| AK003991  | nudix (nucleoside diphosphate linked moiety X)-type motif 14(Nudt14)                            | 1.6 |
| AK021338  | RIKEN cDNA D730044K07 gene(D730044K07Rik)                                                       | 1.6 |
| AK011469  | FERM domain containing 6(Frmd6)                                                                 | 1.6 |
| AK016932  | RIKEN cDNA 4933426I03 gene(4933426I03Rik)                                                       | 1.6 |
| BC004079  | mercaptopyruvate sulfurtransferase(Mpst)                                                        | 1.6 |
| AK005212  | nuclear export mediator factor(Nemf)                                                            | 1.6 |
| AK016814  | RIKEN cDNA 4933415A04 gene(4933415A04Rik)                                                       | 1.6 |
| Z12396    |                                                                                                 | 1.6 |
| NM_025687 | testis expressed gene 12(Tex12)                                                                 | 1.6 |
|           | SWI/SNF related, matrix associated, actin dependent regulator of chromatin, subfamily c, member |     |
| AK013190  | 2(Smarcc2)                                                                                      | 1.6 |
| AB030199  | integral membrane protein 2C(Itm2c)                                                             | 1.6 |
| NM_026119 | mediator complex subunit 4(Med4)                                                                | 1.6 |

|           |                                                                                |     |
|-----------|--------------------------------------------------------------------------------|-----|
| NM_008486 | alanyl (membrane) aminopeptidase(Anpep)                                        | 1.6 |
| U48240    | D4, zinc and double PHD fingers family 1(Dpf1)                                 | 1.6 |
| BC011059  | vacuolar protein sorting 33B(Vps33b)                                           | 1.6 |
| AK007402  | cell growth regulator with ring finger domain 1(Cgrrf1)                        | 1.6 |
| NM_013517 | Fc receptor, IgE, low affinity II, alpha polypeptide(Fcer2a)                   | 1.6 |
| NM_023173 | dual specificity phosphatase 12(Dusp12)                                        | 1.6 |
| X53630    |                                                                                | 1.6 |
| Z11664    | son of sevenless homolog 2 (Drosophila)(Sos2)                                  | 1.6 |
| AK003642  | RIKEN cDNA 1110012L19 gene(1110012L19Rik)                                      | 1.6 |
| AF038572  | jagged 2(Jag2)                                                                 | 1.6 |
| Z86006    | T cell receptor beta, joining region(Tcrb-J)                                   | 1.6 |
| AK011940  | RIKEN cDNA 2610300A13 gene(2610300A13Rik)                                      | 1.6 |
| NM_025404 | ADP-ribosylation factor-like 4D(Arl4d)                                         | 1.6 |
| BC002112  |                                                                                | 1.6 |
| AK009217  | kallikrein related-peptidase 12(Klk12)                                         | 1.6 |
| NM_026693 | gamma-aminobutyric acid (GABA) A receptor-associated protein-like 2(Gabarapl2) | 1.6 |
| NM_008934 | protein C(Proc)                                                                | 1.6 |
| AK013682  | RIKEN cDNA 2900054C01 gene(2900054C01Rik)                                      | 1.6 |
| AK021308  | RIKEN cDNA D530034E23 gene(D530034E23Rik)                                      | 1.6 |
| NM_009608 | actin, alpha, cardiac muscle 1(Actc1)                                          | 1.6 |
| AK006658  | protease-associated domain containing 1(Pradc1)                                | 1.6 |
| AK010427  | RIKEN cDNA 2410006H16 gene(2410006H16Rik)                                      | 1.6 |
| AK004108  | RIKEN cDNA 1110035E04 gene(1110035E04Rik)                                      | 1.6 |
| AK014684  | RIKEN cDNA 4833412C15 gene(4833412C15Rik)                                      | 1.6 |
| AK012120  | solute carrier family 39 (zinc transporter), member 9(Slc39a9)                 | 1.6 |
| NM_019460 | Scm-like with four mbt domains 1(Sfmbt1)                                       | 1.7 |
| AK019832  | RIKEN cDNA 4930588G05 gene(4930588G05Rik)                                      | 1.7 |
| NM_018769 | deafness, autosomal dominant 5 (human)(Dfna5)                                  | 1.7 |

---

|           |                                                                                               |     |
|-----------|-----------------------------------------------------------------------------------------------|-----|
| AK019758  | RIKEN cDNA 4930551E15 gene(4930551E15Rik)                                                     | 1.7 |
| AK014627  | RIKEN cDNA 4731417B20 gene(4731417B20Rik)                                                     | 1.7 |
| AK021254  | whirlin(Whrn)                                                                                 | 1.7 |
| BC002226  | hook microtubule tethering protein 2(Hook2)                                                   | 1.7 |
| AK014832  | Down syndrome cell adhesion molecule like 1(Dscaml1)                                          | 1.7 |
| AK020326  | RIKEN cDNA 9230108I15 gene(9230108I15Rik)                                                     | 1.7 |
| AK011166  | Scarletltr, erythroid developmental long intergenic non-protein coding transcript(Scarletltr) | 1.7 |
| AK004405  | XRCC6 binding protein 1(Xrcc6bp1)                                                             | 1.7 |
| BC014728  | transmembrane protein 38A(Tmem38a)                                                            | 1.7 |
| AK013967  | glutathione S-transferase, C-terminal domain containing(Gstcd)                                | 1.7 |
| NM_011631 | heat shock protein 90, beta (Grp94), member 1(Hsp90b1)                                        | 1.7 |
| NM_008856 | protein kinase C, eta(Prkch)                                                                  | 1.7 |
| NM_007714 | CDC like kinase 4(Clk4)                                                                       | 1.7 |
| AK014048  | RIKEN cDNA 3110013M02 gene(3110013M02Rik)                                                     | 1.7 |
| AK004569  | cell division cycle 40(Cdc40)                                                                 | 1.7 |
| AK020390  | Scm-like with four mbt domains 1(Sfmbt1)                                                      | 1.7 |
| NM_020272 | phosphoinositide-3-kinase, catalytic, gamma polypeptide(Pik3cg)                               | 1.7 |
| NM_026208 | RIKEN cDNA 1700019N19 gene(1700019N19Rik)                                                     | 1.7 |
| AK005591  | RIKEN cDNA 1700001G11 gene(1700001G11Rik)                                                     | 1.7 |
| NM_018775 | TBC1 domain family, member 8(Tbc1d8)                                                          | 1.7 |
| AK008233  | motile sperm domain containing 4(Mospd4)                                                      | 1.7 |
| NM_025639 | centromere protein M(Cenpm)                                                                   | 1.7 |
| AK013752  | zinc finger and BTB domain containing 25(Zbtb25)                                              | 1.7 |
| AK004989  | mitochondrial amidoxime reducing component 1(Marc1)                                           | 1.7 |
| AK020356  | RIKEN cDNA 9230118H08 gene(9230118H08Rik)                                                     | 1.7 |
| AK007109  | RIKEN cDNA 1700101O05 gene(1700101O05Rik)                                                     | 1.7 |
| AK021018  | centlein, centrosomal protein(Cntln)                                                          | 1.7 |
| AK004067  | inositol 1,4,5-trisphosphate 3-kinase B(Itpkb)                                                | 1.7 |



---

|           |                                                                                        |     |
|-----------|----------------------------------------------------------------------------------------|-----|
| X94291    | small nucleolar RNA, H/ACA box 74A(Snora74a)                                           | 1.7 |
| AK007309  | RIKEN cDNA 1700128E19 gene(1700128E19Rik)                                              | 1.7 |
| AK019909  | rabenosyn, RAB effector(Rbsn)                                                          | 1.7 |
| X16214    |                                                                                        | 1.7 |
| AK007076  |                                                                                        | 1.7 |
| NM_021474 | epidermal growth factor-containing fibulin-like extracellular matrix protein 2(Efemp2) | 1.7 |
| AK018655  | RIKEN cDNA 9130401M01 gene(9130401M01Rik)                                              | 1.7 |
| AK013926  | RIKEN cDNA 3100003L05 gene(3100003L05Rik)                                              | 1.7 |
| NM_008865 | prolactin family 3, subfamily b, member 1(Prl3b1)                                      | 1.7 |
| AF187073  |                                                                                        | 1.7 |
| AK003700  | WAS/WASL interacting protein family, member 2(Wipf2)                                   | 1.7 |
| AJ132672  |                                                                                        | 1.7 |
| AK017006  | RIKEN cDNA 4933431J24 gene(4933431J24Rik)                                              | 1.7 |
| AB055854  | predicted gene, 21951(Gm21951)                                                         | 1.7 |
| NM_009639 | cysteine-rich secretory protein 3(Crisp3)                                              | 1.7 |
| NM_021414 | S-adenosylhomocysteine hydrolase-like 2(Ahcyl2)                                        | 1.7 |
| AK019908  | RIKEN cDNA 5330425B07 gene(5330425B07Rik)                                              | 1.7 |
| BC004674  | RNA binding motif protein 10(Rbm10)                                                    | 1.7 |
| AK013535  | RIKEN cDNA 2900016D18 gene(2900016D18Rik)                                              | 1.7 |
| AK008369  | small nucleolar RNA host gene 8(Snhg8)                                                 | 1.7 |
| NM_016894 | receptor (calcitonin) activity modifying protein 1(Ramp1)                              | 1.7 |
| NM_033072 | methyl-CpG binding domain protein 6(Mbd6)                                              | 1.7 |
| AK014067  | scaffold attachment factor B(Safb)                                                     | 1.7 |
| AK017038  | RIKEN cDNA 4933433F19 gene(4933433F19Rik)                                              | 1.7 |
| NM_011530 | transporter 2, ATP-binding cassette, sub-family B (MDR/TAP)(Tap2)                      | 1.7 |
| BC008534  | TRAF3 interacting protein 2(Traf3ip2)                                                  | 1.7 |
| AK011926  | RIKEN cDNA 2610209C05 gene(2610209C05Rik)                                              | 1.7 |
| AK014557  | tubulin tyrosine ligase-like family, member 4(Ttl4)                                    | 1.7 |

---

|           |                                                                         |     |
|-----------|-------------------------------------------------------------------------|-----|
| NM_026584 | general transcription factor II E, polypeptide 2 (beta subunit)(Gtf2e2) | 1.7 |
| AF031635  |                                                                         | 1.7 |
| AK016332  | RIKEN cDNA 4930567H12 gene(4930567H12Rik)                               | 1.7 |
| NM_023231 | stomatin (Epb7.2)-like 2(Stoml2)                                        | 1.7 |
| L16799    |                                                                         | 1.7 |
| AK010754  | protein phosphatase 2, regulatory subunit A, beta(Ppp2r1b)              | 1.7 |
| AK017905  | RIKEN cDNA 5830407E08 gene(5830407E08Rik)                               | 1.7 |
| AK007899  | RAP1 GTPase activating protein, opposite strand(Rap1gapos)              | 1.7 |
| AK005986  | RIKEN cDNA 1700015C15 gene(1700015C15Rik)                               | 1.7 |
| AK015166  | coiled-coil domain containing 171(Ccdc171)                              | 1.7 |
| NM_016983 | pre-B lymphocyte gene 2(Vpreb2)                                         | 1.7 |
| AJ243933  | cyclic nucleotide gated channel alpha 3(Cnga3)                          | 1.7 |
| NM_008123 | gap junction protein, alpha 8(Gja8)                                     | 1.7 |
| AK008890  | zinc finger protein 84(Zfp84)                                           | 1.7 |
| AK010332  | Nanog homeobox(Nanog)                                                   | 1.7 |
| AK006976  | RIKEN cDNA 1700082C01 gene(1700082C01Rik)                               | 1.7 |
| NM_026632 | replication protein A3(Rpa3)                                            | 1.7 |
| AK020885  | spermatogenesis associated 9(Spata9)                                    | 1.7 |
| NM_019428 | ribonuclease P/MRP 30 subunit(Rpp30)                                    | 1.7 |
| AK006973  | RIKEN cDNA 1700081N11 gene(1700081N11Rik)                               | 1.7 |
| NM_009344 | pleckstrin homology like domain, family A, member 1(Phlda1)             | 1.7 |
| U43721    | cystathionine beta-synthase(Cbs)                                        | 1.7 |
| AK004439  | adenylate kinase 8(Ak8)                                                 | 1.7 |
| AF000908  |                                                                         | 1.7 |
| NM_026509 | muscle-related coiled-coil protein(Murc)                                | 1.7 |
| NM_026267 | NECAP endocytosis associated 1(Necap1)                                  | 1.7 |
| AJ277219  |                                                                         | 1.7 |
| NM_008624 | muscle and microspikes RAS(Mras)                                        | 1.7 |

---

|           |                                                                        |     |
|-----------|------------------------------------------------------------------------|-----|
| AK008069  | polymerase (RNA) III (DNA directed) polypeptide G like(Polr3gl)        | 1.7 |
| AF365932  | zinc finger, imprinted 3(Zim3)                                         | 1.7 |
| Z12491    |                                                                        | 1.7 |
| BC002153  | heat shock factor binding protein 1(Hsbp1)                             | 1.7 |
| AK021073  | RIKEN cDNA C030013D06 gene(C030013D06Rik)                              | 1.7 |
| NM_026519 | ER membrane protein complex subunit 4(Emc4)                            | 1.7 |
| BC006074  | apoptosis resistant E3 ubiquitin protein ligase 1(Arel1)               | 1.7 |
| AF042360  | olfactory receptor 1355(Olfr1355)                                      | 1.7 |
| NM_025469 | colipase, pancreatic(Clps)                                             | 1.7 |
| AK004331  | peptidylprolyl isomerase (cyclophilin)-like 1(Ppil1)                   | 1.7 |
| U72677    | oncoprotein induced transcript 1(Oit1)                                 | 1.7 |
| NM_011963 | pregnancy specific glycoprotein 18(Psg18)                              | 1.7 |
| AK021065  | RIKEN cDNA C030011I16 gene(C030011I16Rik)                              | 1.7 |
| AK011386  | myeloid/lymphoid or mixed-lineage leukemia; translocated to, 3(Mllt3)  | 1.7 |
| AK017368  | RIKEN cDNA 5430431A17 gene(5430431A17Rik)                              | 1.7 |
| AK019768  | RIKEN cDNA 4930556A17 gene(4930556A17Rik)                              | 1.7 |
| NM_033042 | tumor necrosis factor receptor superfamily, member 25(Tnfrsf25)        | 1.7 |
| AF408433  | transmembrane protein 209(Tmem209)                                     | 1.7 |
| NM_007535 | B cell leukemia/lymphoma 2 related protein A1c(Bcl2a1c)                | 1.7 |
| AK013640  |                                                                        | 1.7 |
| AK004409  | membrane protein, palmitoylated 7 (MAGUK p55 subfamily member 7)(Mpp7) | 1.7 |
| AK021287  | RIKEN cDNA D530014G21 gene(D530014G21Rik)                              | 1.7 |
| L16846    | B cell translocation gene 1, anti-proliferative(Btg1)                  | 1.7 |
| NM_023311 | Yip1 domain family, member 5(Yipf5)                                    | 1.7 |
| AK002741  | citrate lyase beta like(Clybl)                                         | 1.7 |
| AF282286  |                                                                        | 1.7 |
| AF093875  |                                                                        | 1.7 |
| AK012608  | cutA divalent cation tolerance homolog(Cuta)                           | 1.7 |

---

|           |                                                                |     |
|-----------|----------------------------------------------------------------|-----|
| NM_016985 | myotubularin related protein 1(Mtmr1)                          | 1.7 |
| AK009861  | zinc finger, CCHC domain containing 24(Zcchc24)                | 1.7 |
| AK020834  | RIKEN cDNA A930009A15 gene(A930009A15Rik)                      | 1.7 |
| NM_019933 | protein tyrosine phosphatase, non-receptor type 4(Ptpn4)       | 1.7 |
| S41227    |                                                                | 1.7 |
| AK013153  | death associated protein kinase 1(Dapk1)                       | 1.7 |
| AJ250106  | bicaudal D homolog 2 (Drosophila)(Bicd2)                       | 1.7 |
| AK014520  | ATPase type 13A4(Atp13a4)                                      | 1.7 |
| AK020300  | cystatin 11(Cst11)                                             | 1.7 |
| AK014419  | nucleoporin 205(Nup205)                                        | 1.7 |
| AK008165  | kynurenine aminotransferase 1(Kyat1)                           | 1.7 |
| AK015930  | zinc finger, BED domain containing 4 pseudogene(4930529C04Rik) | 1.7 |
| AK014831  | RIKEN cDNA 4921507G05 gene(4921507G05Rik)                      | 1.7 |
| AF014451  |                                                                | 1.7 |
| AK014880  | armadillo repeat containing 3(Armc3)                           | 1.7 |
| AK007279  | RIKEN cDNA 1700125G22 gene(1700125G22Rik)                      | 1.7 |
| AK016050  | RIKEN cDNA 4930546E12 gene(4930546E12Rik)                      | 1.7 |
| NM_025465 | translation machinery associated 16(Tma16)                     | 1.7 |
| NM_010496 | inhibitor of DNA binding 2(Id2)                                | 1.7 |
| NM_026124 | RIKEN cDNA 1110008F13 gene(1110008F13Rik)                      | 1.7 |
| AK015158  | family with sequence similarity 228, member A(Fam228a)         | 1.7 |
| U57328    | T-box 3(Tbx3)                                                  | 1.7 |
| AK019250  | RIKEN cDNA 2810030D12 gene(2810030D12Rik)                      | 1.7 |
| AK012763  | RIKEN cDNA 2810019C22 gene(2810019C22Rik)                      | 1.7 |
| AB031386  | transmembrane protein 176B(Tmem176b)                           | 1.7 |
| AK021367  | RIKEN cDNA E130102C15 gene(E130102C15Rik)                      | 1.7 |
| BC006931  | expressed sequence AI597479(AI597479)                          | 1.7 |
| BF531396  |                                                                | 1.7 |

---

|           |                                                                       |     |
|-----------|-----------------------------------------------------------------------|-----|
| AK013267  | tetratricopeptide repeat domain 39C(Ttc39c)                           | 1.7 |
| AK020548  | RIKEN cDNA 9530006O14 gene(9530006O14Rik)                             | 1.7 |
| AK014837  | alkB homolog 3, opposite strand 1(Alkbh3os1)                          | 1.7 |
| Z12220    |                                                                       | 1.7 |
| AK008216  | mitochondrial calcium uniporter(Mcu)                                  | 1.7 |
| AK016620  | RIKEN cDNA 4933402J10 gene(4933402J10Rik)                             | 1.7 |
| AF394596  | hypocretin (orexin) receptor 1(Hcrtr1)                                | 1.7 |
| AK008900  | transmembrane protein 238(Tmem238)                                    | 1.7 |
| Z78145    | microtubule associated serine/threonine kinase family member 4(Mast4) | 1.7 |
| AK014697  | dendrocyte expressed seven transmembrane protein(Dcstamp)             | 1.7 |
| AK015917  | dual specificity phosphatase 18(Dusp18)                               | 1.7 |
| AK008856  | Ral GEF with PH domain and SH3 binding motif 2(Ralgps2)               | 1.8 |
| BC002310  | zinc finger protein 652(Zfp652)                                       | 1.8 |
| D14175    |                                                                       | 1.8 |
| BC011335  | golgi-specific brefeldin A-resistance factor 1(Gbf1)                  | 1.8 |
| AK005716  | EF-hand calcium binding domain 9(Efcab9)                              | 1.8 |
| AK021023  | nucleolar protein 3 (apoptosis repressor with CARD domain)(Nol3)      | 1.8 |
| NM_025290 | radial spoke head 1 homolog (Chlamydomonas)(Rsph1)                    | 1.8 |
| M92329    |                                                                       | 1.8 |
| BC010713  | ADP-ribosylation factor related protein 1(Arfrp1)                     | 1.8 |
| AK020455  | NF-kappaB repressing factor(Nkrf)                                     | 1.8 |
| AK019718  | RIKEN cDNA 4930534H18 gene(4930534H18Rik)                             | 1.8 |
| AK015682  | RIKEN cDNA 4930502M04 gene(4930502M04Rik)                             | 1.8 |
| BC013625  | NOL1/NOP2/Sun domain family member 2(Nsun2)                           | 1.8 |
| Z12211    |                                                                       | 1.8 |
| AK013061  | cat eye syndrome chromosome region, candidate 2(Cecr2)                | 1.8 |
| NM_007674 | caudal type homeobox 4(Cdx4)                                          | 1.8 |
| AK008832  | small integral membrane protein 24(Smim24)                            | 1.8 |

---

|           |                                                                       |     |
|-----------|-----------------------------------------------------------------------|-----|
| AK017067  | maestro(Mro)                                                          | 1.8 |
| NM_011770 | IKAROS family zinc finger 2(Ikzf2)                                    | 1.8 |
| X02569    |                                                                       | 1.8 |
| U34960    | guanine nucleotide binding protein (G protein), beta 2(Gnb2)          | 1.8 |
| AF357488  |                                                                       | 1.8 |
| BC004010  | RIKEN cDNA 9430015G10 gene(9430015G10Rik)                             | 1.8 |
| AK008070  | eukaryotic translation initiation factor 1A domain containing(Eif1ad) | 1.8 |
| AK013908  | RIKEN cDNA 3021401N23 gene(3021401N23Rik)                             | 1.8 |
| AK006782  | nipsnap homolog 3A (C. elegans)(Nipsnap3a)                            | 1.8 |
| U55527    |                                                                       | 1.8 |
| AK010701  | death effector domain-containing DNA binding protein 2(Dedd2)         | 1.8 |
| AJ251685  | glycoprotein (transmembrane) nmb(Gpnmb)                               | 1.8 |
| AK004546  | osteopetrosis associated transmembrane protein 1(Ostm1)               | 1.8 |
| AK020941  | RIKEN cDNA A930037O16 gene(A930037O16Rik)                             | 1.8 |
| BC014755  | eukaryotic translation initiation factor 3, subunit H(Eif3h)          | 1.8 |
| BC013487  | DnaJ heat shock protein family (Hsp40) member C17(Dnajc17)            | 1.8 |
| AF338224  |                                                                       | 1.8 |
| AK020437  | Ts translation elongation factor, mitochondrial(Tsfm)                 | 1.8 |
| BC004580  | RAB28, member RAS oncogene family(Rab28)                              | 1.8 |
| NM_030239 | ATP-binding cassette, sub-family G (WHITE), member 3(Abcg3)           | 1.8 |
| NM_025439 | transmembrane protein 9(Tmem9)                                        | 1.8 |
| NM_025403 | NOP10 ribonucleoprotein(Nop10)                                        | 1.8 |
| NM_016714 | nucleoporin 50(Nup50)                                                 | 1.8 |
| M21383    |                                                                       | 1.8 |
| NM_023557 | solute carrier family 44, member 4(Slc44a4)                           | 1.8 |
| AF287293  | LETM1 domain containing 1(Letmd1)                                     | 1.8 |
| AK020345  | RIKEN cDNA 9230113P08 gene(9230113P08Rik)                             | 1.8 |
| M33395    |                                                                       | 1.8 |

---

|           |                                                                   |     |
|-----------|-------------------------------------------------------------------|-----|
| NM_019747 | zinc finger protein 113(Zfp113)                                   | 1.8 |
| AJ251363  | torsin A interacting protein 2(Tor1aip2)                          | 1.8 |
| AK016348  | RIKEN cDNA 4930584E12 gene(4930584E12Rik)                         | 1.8 |
| AK004374  | RIKEN cDNA 1110065H08 gene(1110065H08Rik)                         | 1.8 |
| BC008274  | paroxysmal nonkinesigenic dyskinesia(Pnkd)                        | 1.8 |
| NM_011755 | zinc finger protein 35(Zfp35)                                     | 1.8 |
| AK016565  | RIKEN cDNA 4932442E05 gene(4932442E05Rik)                         | 1.8 |
| AK013346  | Kdm5c adjacent non-coding transcript(Kantr)                       | 1.8 |
| AK016142  | RIKEN cDNA 4930556C24 gene(4930556C24Rik)                         | 1.8 |
| AK014261  | RIKEN cDNA 3110079O15 gene(3110079O15Rik)                         | 1.8 |
| AK006797  | IQ motif containing F1(Iqcf1)                                     | 1.8 |
| Z12451    |                                                                   | 1.8 |
| U29238    |                                                                   | 1.8 |
| AK016483  | RIKEN cDNA 4931428L18 gene(4931428L18Rik)                         | 1.8 |
| U15218    | dystrophin, muscular dystrophy(Dmd)                               | 1.8 |
| AF106853  | crystallin, beta B1(Crybb1)                                       | 1.8 |
| AK017325  | sarcoglycan, gamma (dystrophin-associated glycoprotein)(Sgcg)     | 1.8 |
| NM_023182 | chymotrypsin-like(Ctrl)                                           | 1.8 |
| NM_025759 | spermatogenesis associated glutamate (E)-rich protein 4D(Speer4d) | 1.8 |
| AF041882  |                                                                   | 1.8 |
| NM_025523 | NADH dehydrogenase (ubiquinone) 1, subcomplex unknown, 1(Ndufc1)  | 1.8 |
| U76754    | ring finger protein 213(Rnf213)                                   | 1.8 |
| AK004796  | RIKEN cDNA 1200015M12 gene(1200015M12Rik)                         | 1.8 |
| AK021118  | regulating synaptic membrane exocytosis 1(Rims1)                  | 1.8 |
| NM_011172 | proline dehydrogenase(Prodh)                                      | 1.8 |
| AK004564  | NHL repeat containing 2(Nhlrc2)                                   | 1.8 |
| AK017086  | RIKEN cDNA 4933436I20 gene(4933436I20Rik)                         | 1.8 |
| AK015013  | rotatin(Rttn)                                                     | 1.8 |

---

|           |                                                                                              |     |
|-----------|----------------------------------------------------------------------------------------------|-----|
| AK012049  | family with sequence similarity 172, member A(Fam172a)                                       | 1.8 |
| AF041960  |                                                                                              | 1.8 |
| U16180    |                                                                                              | 1.8 |
| NM_026042 | mediator complex subunit 29(Med29)                                                           | 1.8 |
| AK016766  | RIKEN cDNA 4933411D12 gene(4933411D12Rik)                                                    | 1.8 |
| Z12246    |                                                                                              | 1.8 |
| AK002641  | nudix (nucleoside diphosphate linked moiety X)-type motif 12(Nudt12)                         | 1.8 |
| U55488    |                                                                                              | 1.8 |
| NM_013612 | solute carrier family 11 (proton-coupled divalent metal ion transporters), member 1(Slc11a1) | 1.8 |
| AK014556  | EPS8-like 1(Eps8l1)                                                                          | 1.8 |
| NM_011824 | gremlin 1, DAN family BMP antagonist(Grem1)                                                  | 1.8 |
| AF249870  | PERP, TP53 apoptosis effector(Perp)                                                          | 1.8 |
| AK020225  | RIKEN cDNA 8030497O21 gene(8030497O21Rik)                                                    | 1.8 |
| NM_026105 | RIKEN cDNA 1700093K21 gene(1700093K21Rik)                                                    | 1.8 |
| BC007167  | neurexophilin 3(Nxph3)                                                                       | 1.8 |
| AK010163  | transmembrane protein 123(Tmem123)                                                           | 1.8 |
| AK015160  | RIKEN cDNA 4930417O22 gene(4930417O22Rik)                                                    | 1.8 |
| AK016682  | RIKEN cDNA 4933406C10 gene(4933406C10Rik)                                                    | 1.8 |
| BC006063  | nonhomologous end-joining factor 1(Nhej1)                                                    | 1.8 |
| NM_026522 | chitinase domain containing 1(Chid1)                                                         | 1.8 |
| AK015313  | potassium channel tetramerisation domain containing 16(Kctd16)                               | 1.8 |
| AK017571  | cholinergic receptor, nicotinic, beta polypeptide 3(Chrn3)                                   | 1.8 |
| NM_008245 | hematopoietically expressed homeobox(Hhex)                                                   | 1.8 |
| NM_016810 | golgi SNAP receptor complex member 1(Gosr1)                                                  | 1.8 |
| AK013547  | transmembrane protein 86B(Tmem86b)                                                           | 1.8 |
| NM_008135 | solute carrier family 6 (neurotransmitter transporter, glycine), member 9(Slc6a9)            | 1.8 |
| NM_008412 | involucrin(Ivl)                                                                              | 1.8 |
| AK020241  | RIKEN cDNA 9030201C23 gene(9030201C23Rik)                                                    | 1.8 |



---

|           |                                                                                |     |
|-----------|--------------------------------------------------------------------------------|-----|
| NM_008524 | lumican(Lum)                                                                   | 1.8 |
| Z78156    | DDHD domain containing 2(Ddhd2)                                                | 1.8 |
| AK008228  | farnesyltransferase, CAAX box, beta(Fntb)                                      | 1.8 |
| AK006376  | RIKEN cDNA 1700026D11 gene(1700026D11Rik)                                      | 1.8 |
| L09105    |                                                                                | 1.8 |
| AK006067  | RIKEN cDNA 1700017I07 gene(1700017I07Rik)                                      | 1.8 |
| NM_023120 | guanine nucleotide binding protein (G protein), beta polypeptide 1-like(Gnb1l) | 1.8 |
| AK016661  | RIKEN cDNA 4933405D12 gene(4933405D12Rik)                                      | 1.8 |
| AF092039  | steroid receptor RNA activator 1(Sra1)                                         | 1.8 |
| AK017418  | RIKEN cDNA 5430440P10 gene(5430440P10Rik)                                      | 1.8 |
| AK015245  | transmembrane protein 81(Tmem81)                                               | 1.8 |
| AK012601  | matrix-remodelling associated 7(Mxra7)                                         | 1.8 |
| BC005546  | ERBB receptor feedback inhibitor 1(Errfi1)                                     | 1.8 |
| AB043357  |                                                                                | 1.8 |
| NM_019979 | selenoprotein K(Selk)                                                          | 1.8 |
| AK006872  | RIKEN cDNA 1700063J08 gene(1700063J08Rik)                                      | 1.8 |
| AK019166  | spermatogenesis associated 2-like(Spata2l)                                     | 1.8 |
| AK014727  | RIKEN cDNA 4833419G08 gene(4833419G08Rik)                                      | 1.8 |
| AK015658  | RIKEN cDNA 4930500F04 gene(4930500F04Rik)                                      | 1.8 |
| AK007940  | prefoldin 4(Pfdn4)                                                             | 1.8 |
| NM_019917 | vomerinasal 2, receptor 26(Vmn2r26)                                            | 1.8 |
| AK007819  |                                                                                | 1.8 |
| AK010512  | DEAH (Asp-Glu-Ala-His) box polypeptide 40(Dhx40)                               | 1.8 |
| NM_010591 | jun proto-oncogene(Jun)                                                        | 1.8 |
| D83144    | sine oculis-related homeobox 3(Six3)                                           | 1.8 |
| AK015711  | RIKEN cDNA 4930505O20 gene(4930505O20Rik)                                      | 1.8 |
| NM_026106 | down-regulator of transcription 1(Dr1)                                         | 1.8 |
| BC006674  | spindle apparatus coiled-coil protein 1(Spd11)                                 | 1.8 |

---

|           |                                                                               |     |
|-----------|-------------------------------------------------------------------------------|-----|
| L24755    | bone morphogenetic protein 1(Bmp1)                                            | 1.8 |
| AJ298841  | torsin family 1, member A (torsin A)(Tor1a)                                   | 1.8 |
| NM_011604 | toll-like receptor 6(Tlr6)                                                    | 1.8 |
| AK017233  | RIKEN cDNA 5330403D14 gene(5330403D14Rik)                                     | 1.8 |
| U84407    | agrin(Agrn)                                                                   | 1.8 |
| NM_009192 | src-like adaptor(Sla)                                                         | 1.8 |
| AK007756  | NADH dehydrogenase (ubiquinone) 1 alpha subcomplex assembly factor 8(Ndufaf8) | 1.8 |
| AK017945  | RIKEN cDNA 5830424K16 gene(5830424K16Rik)                                     | 1.8 |
| AK009622  | RIKEN cDNA 2310034O05 gene(2310034O05Rik)                                     | 1.8 |
| BC006061  | RIKEN cDNA 2010111I01 gene(2010111I01Rik)                                     | 1.8 |
| M12308    |                                                                               | 1.8 |
| NM_025628 | cytochrome c oxidase, subunit VIb polypeptide 1(Cox6b1)                       | 1.8 |
| D87034    | teneurin transmembrane protein 4(Tenm4)                                       | 1.8 |
| AK006691  | RIKEN cDNA 1700042O13 gene(1700042O13Rik)                                     | 1.8 |
| AY028960  |                                                                               | 1.8 |
| NM_009975 | casein kinase 2, beta polypeptide(Csnk2b)                                     | 1.8 |
| AK007055  | RIKEN cDNA 1700093P08 gene(1700093P08Rik)                                     | 1.8 |
| AK016392  | RIKEN cDNA 4930594M17 gene(4930594M17Rik)                                     | 1.8 |
| AK015500  | RIKEN cDNA 4930463O16 gene(4930463O16Rik)                                     | 1.8 |
| AF053473  | kinesin family member 5A(Kif5a)                                               | 1.8 |
| AK019887  | RIKEN cDNA 5033405D04 gene(5033405D04Rik)                                     | 1.8 |
| AK015559  |                                                                               | 1.8 |
| AF312938  | activating transcription factor 5(Atf5)                                       | 1.8 |
| AF366393  | protein phosphatase 2, regulatory subunit B, delta(Ppp2r2d)                   | 1.8 |
| NM_026369 | actin related protein 2/3 complex, subunit 5(Arpc5)                           | 1.8 |
| AK009628  | RIKEN cDNA 2310035C23 gene(2310035C23Rik)                                     | 1.8 |
| X16955    |                                                                               | 1.8 |
| NM_025714 | outer dense fiber of sperm tails 2-like(Odf2l)                                | 1.8 |

---

|           |                                                                       |     |
|-----------|-----------------------------------------------------------------------|-----|
| AK016640  | tousled-like kinase 2 (Arabidopsis)(Tlk2)                             | 1.8 |
| AF408408  | sorting nexin 18(Snx18)                                               | 1.8 |
| AK008865  |                                                                       | 1.8 |
| AK021277  | RIKEN cDNA C630043D15 gene(C630043D15Rik)                             | 1.8 |
| BC010479  | crystallin, zeta (quinone reductase)-like 1(Cryzl1)                   | 1.8 |
| NM_008719 | neuronal PAS domain protein 2(Npas2)                                  | 1.8 |
| NM_016872 | vesicle-associated membrane protein 5(Vamp5)                          | 1.8 |
| AK011290  | phosphoribosyl pyrophosphate synthetase-associated protein 1(Prpsap1) | 1.8 |
| AY046504  | translocated promoter region, nuclear basket protein(Tpr)             | 1.8 |
| AF012178  |                                                                       | 1.8 |
| U50718    | nitric oxide synthase 1, neuronal(Nos1)                               | 1.8 |
| NM_011839 | mab-21-like 2 (C. elegans)(Mab21l2)                                   | 1.8 |
| AK018659  | RIKEN cDNA 9130403I23 gene(9130403I23Rik)                             | 1.9 |
| AK013132  | oxidative-stress responsive 1(Oxsr1)                                  | 1.9 |
| AK016830  | zinc finger protein 689(Zfp689)                                       | 1.9 |
| AK016044  | HYDIN, axonemal central pair apparatus protein(Hydin)                 | 1.9 |
| X17683    |                                                                       | 1.9 |
| Z12214    |                                                                       | 1.9 |
| AK014187  | RIKEN cDNA 5430402O13 gene(5430402O13Rik)                             | 1.9 |
| AF384559  |                                                                       | 1.9 |
| M15442    | proteolipid protein (myelin) 1(Plp1)                                  | 1.9 |
| AK012748  | hydroxyacylglutathione hydrolase-like(Haghl)                          | 1.9 |
| NM_019999 | paroxysmal nonkinesinogenic dyskinesia(Pnkd)                          | 1.9 |
| AK011950  | RIKEN cDNA 2610301B20 gene(2610301B20Rik)                             | 1.9 |
| AK020352  | serine peptidase inhibitor, Kazal type 12(Spink12)                    | 1.9 |
| AK019628  | RIKEN cDNA 4930452N14 gene(4930452N14Rik)                             | 1.9 |
| AK011332  | histone deacetylase 8(Hdac8)                                          | 1.9 |
| NM_015772 | sal-like 2 (Drosophila)(Sall2)                                        | 1.9 |

---

|           |                                                                        |     |
|-----------|------------------------------------------------------------------------|-----|
| BC012262  | Rho guanine nucleotide exchange factor (GEF) 3(Arhgef3)                | 1.9 |
| AK012773  | acyl-Coenzyme A dehydrogenase family, member 9(Acad9)                  | 1.9 |
| BC014857  | serine/arginine-rich splicing factor 7(Srsf7)                          | 1.9 |
| AF131137  |                                                                        | 1.9 |
| NM_024258 | ubiquitin specific peptidase 16(Usp16)                                 | 1.9 |
| AK020039  | zinc finger with KRAB and SCAN domains 1(Zkscan1)                      | 1.9 |
| AK020189  | zinc finger protein 626(Zfp626)                                        | 1.9 |
| AF177147  |                                                                        | 1.9 |
| BC004839  | casein kinase 1, gamma 2(Csnk1g2)                                      | 1.9 |
| AK018401  | alpha-kinase 1(Alpk1)                                                  | 1.9 |
| NM_021565 | midnolin(Midn)                                                         | 1.9 |
| AK013171  | RIKEN cDNA 2810427C15 gene(2810427C15Rik)                              | 1.9 |
| AK018211  | RIKEN cDNA 6330510M09 gene(6330510M09Rik)                              | 1.9 |
| AK017574  | RIKEN cDNA 5730419A17 gene(5730419A17Rik)                              | 1.9 |
| NM_027028 | tescalcin-like(Tescl)                                                  | 1.9 |
| AK004227  | double homeobox B-like 1(Duxbl1)                                       | 1.9 |
| Z12237    |                                                                        | 1.9 |
| AK008693  | zinc finger protein 846(Zfp846)                                        | 1.9 |
| NM_019499 | MAD2 mitotic arrest deficient-like 1(Mad2l1)                           | 1.9 |
| NM_010059 | DNA meiotic recombinase 1(Dmcl1)                                       | 1.9 |
| AK014892  | 5'-nucleotidase, cytosolic IB(Nt5c1b)                                  | 1.9 |
| BC008229  | arginine/serine-rich coiled-coil 2(Rsrc2)                              | 1.9 |
| AK013012  | kelch-like 35(Klhl35)                                                  | 1.9 |
| AK009282  | LY6/PLAUR domain containing 6B(Lypd6b)                                 | 1.9 |
| AK017765  | RIKEN cDNA 5730512F23 gene(5730512F23Rik)                              | 1.9 |
| AK010706  | ELAV (embryonic lethal, abnormal vision)-like 1 (Hu antigen R)(Elavl1) | 1.9 |
| BC011475  | seizure related 6 homolog like 2(Sez6l2)                               | 1.9 |
| AK013767  | RIKEN cDNA 2900072G19 gene(2900072G19Rik)                              | 1.9 |

---

|           |                                                                    |     |
|-----------|--------------------------------------------------------------------|-----|
| Z47780    |                                                                    | 1.9 |
| U47923    | platelet derived growth factor receptor, alpha polypeptide(Pdgfra) | 1.9 |
| NM_018852 | sodium channel, voltage-gated, type IX, alpha(Scn9a)               | 1.9 |
| AK009507  | phospholipase A2, group IVE(Pla2g4e)                               | 1.9 |
| AK006234  | centromere protein P(Cenpp)                                        | 1.9 |
| NM_025780 | THAP domain containing, apoptosis associated protein 2(Thap2)      | 1.9 |
| AK004814  | glutaminytRNA synthetase(Qars)                                     | 1.9 |
| AK015050  | RIKEN cDNA 4930402H24 gene(4930402H24Rik)                          | 1.9 |
| NM_011716 | Wolfram syndrome 1 homolog (human)(Wfs1)                           | 1.9 |
| NM_020612 |                                                                    | 1.9 |
| AK004733  | DEAH (Asp-Glu-Ala-His) box polypeptide 34(Dhx34)                   | 1.9 |
| AK009930  | EPS8-like 1(Eps8l1)                                                | 1.9 |
| AF145957  | transducin-like enhancer of split 6(Tle6)                          | 1.9 |
| AF236125  | immunoglobulin superfamily, DCC subclass, member 3(Igdcc3)         | 1.9 |
| BC003901  | cyclin-dependent kinase 9 (CDC2-related kinase)(Cdk9)              | 1.9 |
| AF363457  | caspase recruitment domain family, member 14(Card14)               | 1.9 |
| BC003461  | protein kinase, cAMP dependent regulatory, type I, alpha(Prkar1a)  | 1.9 |
| X01433    |                                                                    | 1.9 |
| M29246    |                                                                    | 1.9 |
| AK014130  | RWD domain containing 3(Rwdd3)                                     | 1.9 |
| NM_029239 | protein kinase D3(Prkd3)                                           | 1.9 |
| AK013201  | hematological and neurological expressed 1-like(Hn1l)              | 1.9 |
| NM_028842 | ring finger protein 138, retrogene 1(Rnf138rt1)                    | 1.9 |
| AK020460  | RIKEN cDNA 9430038I01 gene(9430038I01Rik)                          | 1.9 |
| AK014123  | RIKEN cDNA 3110035E14 gene(3110035E14Rik)                          | 1.9 |
| NM_021462 | MAP kinase-interacting serine/threonine kinase 2(Mknk2)            | 1.9 |
| AK011993  | SET domain containing 3(Setd3)                                     | 1.9 |
| AK015273  | sedoheptulokinase(Shpk)                                            | 1.9 |

---

|           |                                                                                             |     |
|-----------|---------------------------------------------------------------------------------------------|-----|
| L14353    |                                                                                             | 1.9 |
| AK017623  | RIKEN cDNA 5730437C11 gene(5730437C11Rik)                                                   | 1.9 |
| BC013508  | mitotic spindle positioning(Misp)                                                           | 1.9 |
| AK010393  | GPN-loop GTPase 1(Gpn1)                                                                     | 1.9 |
| U50962    | CTD (carboxy-terminal domain, RNA polymerase II, polypeptide A) small phosphatase 1(Ctdsp1) | 1.9 |
| AK007857  | 4short chain dehydrogenase/reductase family 9C, member 7(Sdr9c7)                            | 1.9 |
| BC004049  | small integral membrane protein 15(Smim15)                                                  | 1.9 |
| AK007749  | vacuolar protein sorting 13B(Vps13b)                                                        | 1.9 |
| AK004187  | kelch-like 24(Klhl24)                                                                       | 1.9 |
| AK007571  | RIKEN cDNA 1810021B22 gene(1810021B22Rik)                                                   | 1.9 |
| NM_009084 | ribosomal protein L37a(Rpl37a)                                                              | 1.9 |
| NM_009933 | collagen, type VI, alpha 1(Col6a1)                                                          | 1.9 |
| AK017236  | RIKEN cDNA 5330406M23 gene(5330406M23Rik)                                                   | 1.9 |
| AK019863  | small nuclear RNA activating complex, polypeptide 3(Snapc3)                                 | 1.9 |
| AK004390  | sema domain, transmembrane domain (TM), and cytoplasmic domain, (semaphorin) 6D(Sema6d)     | 1.9 |
| NM_009893 | chordin(Chrd)                                                                               | 1.9 |
| AF153350  | a disintegrin and metallopeptidase domain 28(Adam28)                                        | 1.9 |
| AK020508  | RIKEN cDNA 9430087B13 gene(9430087B13Rik)                                                   | 1.9 |
| Z12390    |                                                                                             | 1.9 |
| U00941    |                                                                                             | 1.9 |
| AK016940  | FYVE, RhoGEF and PH domain containing 6(Fgd6)                                               | 1.9 |
| AK018257  | RAB39B, member RAS oncogene family(Rab39b)                                                  | 1.9 |
| AB049941  | mitochondrial ribosomal protein S5(Mrps5)                                                   | 1.9 |
| M17472    |                                                                                             | 1.9 |
| AK013984  | ABRA C-terminal like(Abracl)                                                                | 1.9 |
| NM_026142 | RIKEN cDNA 3632451O06 gene(3632451O06Rik)                                                   | 1.9 |
| D16599    |                                                                                             | 1.9 |
| X73014    |                                                                                             | 1.9 |

---

|           |                                                         |     |
|-----------|---------------------------------------------------------|-----|
| BC012519  | tubulin, gamma complex associated protein 2(Tubgcp2)    | 1.9 |
| AK015953  | RIKEN cDNA 4930533D04 gene(4930533D04Rik)               | 1.9 |
| L19609    |                                                         | 1.9 |
| AK007102  | RIKEN cDNA 1700100L14 gene(1700100L14Rik)               | 1.9 |
| NM_031392 | WD repeat domain 6(Wdr6)                                | 1.9 |
| AK009848  | RIKEN cDNA 2310046G18 gene(2310046G18Rik)               | 1.9 |
| NM_026306 | tRNA methyltransferase 11-2(Trmt112)                    | 1.9 |
| AK017435  | heart development protein with EGF-like domains 1(Heg1) | 1.9 |
| Z12273    |                                                         | 1.9 |
| AK015118  | RIKEN cDNA 4930412E21 gene(4930412E21Rik)               | 1.9 |
| AK014475  | bromodomain containing 8(Brd8)                          | 1.9 |
| AK009865  | DAZ interacting protein 3, zinc finger(Dzip3)           | 1.9 |
| BC011162  | neurocalcin delta(Ncald)                                | 1.9 |
| NM_030555 | pre B cell leukemia homeobox 4(Pbx4)                    | 1.9 |
| AK010419  | leucine rich repeat protein 1(Lrr1)                     | 1.9 |
| BC006828  | microfibrillar-associated protein 3(Mfap3)              | 1.9 |
| NM_007611 | caspase 7(Casp7)                                        | 1.9 |
| Z86015    |                                                         | 1.9 |
| AK012965  | RIKEN cDNA 2810402E24 gene(2810402E24Rik)               | 1.9 |
| AK008716  | prostate androgen-regulated mucin-like protein 1(Parm1) | 1.9 |
| AK020061  | RIKEN cDNA 6030442E23 gene(6030442E23Rik)               | 1.9 |
| NM_022883 | lipin 3(Lpin3)                                          | 1.9 |
| AK016948  | RIKEN cDNA 4933427E13 gene(4933427E13Rik)               | 1.9 |
| NM_011157 | serglycin(Srgn)                                         | 1.9 |
| NM_013700 | ubiquitin specific peptidase 5 (isopeptidase T)(Usp5)   | 1.9 |
| AB009392  | heterogeneous nuclear ribonucleoprotein L(Hnrmpl)       | 2.0 |
| AK015598  | RIKEN cDNA 4930480E11 gene(4930480E11Rik)               | 2.0 |
| AK010472  | zinc finger SWIM-type containing 7(Zswim7)              | 2.0 |

---

|           |                                                                                |     |
|-----------|--------------------------------------------------------------------------------|-----|
| AK003069  | RIKEN cDNA 0910001E24 gene(0910001E24Rik)                                      | 2.0 |
| AK020702  | PYM homolog 1, exon junction complex associated factor(Pym1)                   | 2.0 |
| AK015924  | meiosis specific with OB domains(Meiob)                                        | 2.0 |
| NM_008745 | neurotrophic tyrosine kinase, receptor, type 2(Ntrk2)                          | 2.0 |
| U43520    | dystrophin related protein 2(Drp2)                                             | 2.0 |
| AK010219  | autophagy/beclin 1 regulator 1(Ambra1)                                         | 2.0 |
| AF102520  | olfactory receptor 46(Olfr46)                                                  | 2.0 |
| NM_010507 | interferon alpha 9(Ifna9)                                                      | 2.0 |
| AK011279  | aurora kinase A and ninein interacting protein(Aunip)                          | 2.0 |
| AK010002  | coiled-coil domain containing 115(Ccdc115)                                     | 2.0 |
| NM_025602 | coiled-coil domain containing 59(Ccdc59)                                       | 2.0 |
| AK010574  | RIKEN cDNA 2410022M11 gene(2410022M11Rik)                                      | 2.0 |
| NM_020491 | Sjogren's syndrome/scleroderma autoantigen 1 homolog (human)(Sssca1)           | 2.0 |
| NM_027218 | C-type lectin domain family 4, member b1(Clec4b1)                              | 2.0 |
| AF031634  |                                                                                | 2.0 |
| AK010328  | NADH dehydrogenase (ubiquinone) 1 alpha subcomplex, assembly factor 1(Ndufaf1) | 2.0 |
| AK015179  | zinc finger protein 949(Zfp949)                                                | 2.0 |
| AK011819  | RIKEN cDNA 2610104F20 gene(2610104F20Rik)                                      | 2.0 |
| AF041926  |                                                                                | 2.0 |
| AF156549  | ATPase, class V, type 10A(Atp10a)                                              | 2.0 |
| NM_016697 | glypican 3(Gpc3)                                                               | 2.0 |
| AK018518  | family with sequence similarity 217, member B(Fam217b)                         | 2.0 |
| AF093874  |                                                                                | 2.0 |
| NM_008088 | growth arrest specific 7(Gas7)                                                 | 2.0 |
| AK006762  | cut-like homeobox 2(Cux2)                                                      | 2.0 |
| S42582    |                                                                                | 2.0 |
| D29936    |                                                                                | 2.0 |
| AK015477  | RIKEN cDNA 4930456J16 gene(4930456J16Rik)                                      | 2.0 |



---

|           |                                                                                         |     |
|-----------|-----------------------------------------------------------------------------------------|-----|
| AK018831  | RIKEN cDNA 4930471G03 gene(4930471G03Rik)                                               | 2.0 |
| NM_011351 | sema domain, transmembrane domain (TM), and cytoplasmic domain, (semaphorin) 6C(Sema6c) | 2.0 |
| M22733    |                                                                                         | 2.0 |
| NM_010656 | sarcospan(Sspn)                                                                         | 2.0 |
| AK003240  | sodium channel, voltage-gated, type III, beta(Scn3b)                                    | 2.0 |
| AK009101  | COMM domain containing 10(Commd10)                                                      | 2.0 |
| AK019708  | RIKEN cDNA 4930528J18 gene(4930528J18Rik)                                               | 2.0 |
| AK015120  | RIKEN cDNA 4930412F12 gene(4930412F12Rik)                                               | 2.0 |
| NM_009980 | C-terminal binding protein 2(Ctbp2)                                                     | 2.0 |
| AK020720  | TATA-box binding protein associated factor, RNA polymerase I, B(Taf1b)                  | 2.0 |
| AF000911  |                                                                                         | 2.0 |
| BC011111  | signal sequence receptor, gamma(Ssr3)                                                   | 2.0 |
| M27134    |                                                                                         | 2.0 |
| AK011204  | TBC1 domain family, member 13(Tbc1d13)                                                  | 2.0 |
| AK016318  | RIKEN cDNA 4930579F01 gene(4930579F01Rik)                                               | 2.0 |
| AF013578  |                                                                                         | 2.0 |
| AJ006521  | cholinergic receptor, muscarinic 1, CNS(Chrm1)                                          | 2.0 |
| AK016759  | centrosomal protein 350(Cep350)                                                         | 2.0 |
| NM_010280 | glial cell line derived neurotrophic factor family receptor alpha 3(Gfra3)              | 2.0 |
| AK007061  | dual specificity phosphatase 21(Dusp21)                                                 | 2.0 |
| NM_009794 | calpain 2(Capn2)                                                                        | 2.0 |
| AK006168  | E1A binding protein p400(Ep400)                                                         | 2.0 |
| AK016667  | GINS complex subunit 4 (Sld5 homolog)(Gins4)                                            | 2.0 |
| BC003209  | integrator complex subunit 3(Ints3)                                                     | 2.0 |
| AK019902  | RIKEN cDNA 5330421F21 gene(5330421F21Rik)                                               | 2.0 |
| AK007704  | expressed sequence AU040320(AU040320)                                                   | 2.0 |
| AK018327  | G protein-coupled receptor 165(Gpr165)                                                  | 2.0 |
| AK012513  | RIKEN cDNA C630043F03 gene(C630043F03Rik)                                               | 2.0 |

---

|           |                                                                        |     |
|-----------|------------------------------------------------------------------------|-----|
| X73024    |                                                                        | 2.0 |
| AK012128  | MPN domain containing(Mpnd)                                            | 2.0 |
| AF245444  | glutamate receptor, ionotropic, kainate 3(Grik3)                       | 2.0 |
| AK016576  |                                                                        | 2.0 |
| AK015872  | sorting nexin 16(Snx16)                                                | 2.0 |
| AF326297  |                                                                        | 2.0 |
| Z12544    |                                                                        | 2.0 |
| AK012725  | sperm antigen with calponin homology and coiled-coil domains 1(Specc1) | 2.0 |
| AK002276  | all-trans retinoic acid induced differentiation factor(Atraid)         | 2.0 |
| M64157    |                                                                        | 2.0 |
| M32072    | retinoic acid receptor, gamma(Rarg)                                    | 2.0 |
| AK018881  | RIKEN cDNA 1700066C05 gene(1700066C05Rik)                              | 2.0 |
| NM_008334 | interferon alpha 7(Ifna7)                                              | 2.0 |
| AK005480  | RIKEN cDNA 1600017G08 gene(1600017G08Rik)                              | 2.0 |
| AK005642  | RIKEN cDNA 1700003I16 gene(1700003I16Rik)                              | 2.0 |
| AK021098  | gamma-aminobutyric acid (GABA) A receptor, subunit beta 2(Gabrb2)      | 2.0 |
| BC004035  | ADP-ribosylation factor-like 8A(Arl8a)                                 | 2.0 |
| AK011544  | DIM1 dimethyladenosine transferase 1-like (S. cerevisiae)(Dimt1)       | 2.0 |
| NM_010865 | myocilin(Myoc)                                                         | 2.0 |
| AK016638  | twist basic helix-loop-helix transcription factor 1 neighbor(Twistnb)  | 2.0 |
| NM_019416 |                                                                        | 2.0 |
| X70182    | enolase 3, beta muscle(Eno3)                                           | 2.0 |
| Z12431    |                                                                        | 2.0 |
| AK012792  | RIKEN cDNA 1700037C18 gene(1700037C18Rik)                              | 2.0 |
| AK004339  | SR-related CTD-associated factor 11(Scaf11)                            | 2.0 |
| NM_017372 | lysozyme 2(Lyz2)                                                       | 2.0 |
| AK009671  | carboxylesterase 2F(Ces2f)                                             | 2.0 |
| AF041889  |                                                                        | 2.0 |

|           |                                                                                        |     |
|-----------|----------------------------------------------------------------------------------------|-----|
| NM_010800 | basic helix-loop-helix family, member a15(Bhlha15)                                     | 2.0 |
| AK011687  | RIKEN cDNA 2610036A22 gene(2610036A22Rik)                                              | 2.0 |
| NM_013886 | hepatoma-derived growth factor, related protein 3(Hdgfrp3)                             | 2.0 |
| AK015694  | RIKEN cDNA 4930504B16 gene(4930504B16Rik)                                              | 2.0 |
| AK006139  | RIKEN cDNA 1700019P21 gene(1700019P21Rik)                                              | 2.0 |
| AF148638  | pelota homolog (Drosophila)(Pelo)                                                      | 2.0 |
| BC009104  | transcription elongation factor B (SIII), polypeptide 1(Tceb1)                         | 2.1 |
| U26784    |                                                                                        | 2.1 |
| AK004470  | urate (5-hydroxyiso-) hydrolase(Urah)                                                  | 2.1 |
| AF357489  |                                                                                        | 2.1 |
| BC005716  | acylpeptide hydrolase(Apeh)                                                            | 2.1 |
| NM_031179 | splicing factor 3b, subunit 1(Sf3b1)                                                   | 2.1 |
| AK020935  | RIKEN cDNA A930036K24 gene(A930036K24Rik)                                              | 2.1 |
| AF075717  | TGF-beta1-induced anti-apoptotic factor 2(Tiaf2)                                       | 2.1 |
| NM_021386 | claudin 10(Cldn10)                                                                     | 2.1 |
| AY046077  | Notch-regulated ankyrin repeat protein(Nrarp)                                          | 2.1 |
| BC014805  | solute carrier family 22 (organic cation transporter), member 26(Slc22a26)             | 2.1 |
| AJ400977  |                                                                                        | 2.1 |
| AK006701  | RIKEN cDNA 1700046C09 gene(1700046C09Rik)                                              | 2.1 |
| AF093135  | interleukin-1 receptor-associated kinase 1 binding protein 1(Irak1bp1)                 | 2.1 |
| NM_020620 |                                                                                        | 2.1 |
| U21477    |                                                                                        | 2.1 |
| BC010539  | aarF domain containing kinase 1(Adck1)                                                 | 2.1 |
| AK015123  | RIKEN cDNA 4930412O06 gene(4930412O06Rik)                                              | 2.1 |
| AK011987  | fem-1 homolog c (C.elegans)(Fem1c)                                                     | 2.1 |
| AF095938  | succinate dehydrogenase complex, subunit A, flavoprotein (Fp)(Sdha)                    | 2.1 |
| BC011531  |                                                                                        | 2.1 |
| U35650    | solute carrier family 7 (cationic amino acid transporter, y+ system), member 2(Slc7a2) | 2.1 |

---

|           |                                                                  |     |
|-----------|------------------------------------------------------------------|-----|
| NM_007910 | ephrin A4(Efna4)                                                 | 2.1 |
| BC004710  | target of myb1-like 1 (chicken)(Tom1l1)                          | 2.1 |
| AB047921  | GATA zinc finger domain containing 1(Gatad1)                     | 2.1 |
| AK012547  | structural maintenance of chromosomes 2, opposite strand(Smc2os) | 2.1 |
| NM_025577 | RIKEN cDNA 2810428I15 gene(2810428I15Rik)                        | 2.1 |
| M24272    |                                                                  | 2.1 |
| NM_008137 | guanine nucleotide binding protein, alpha 14(Gna14)              | 2.1 |
| AK015244  | RIKEN cDNA 4930429N05 gene(4930429N05Rik)                        | 2.1 |
| NM_019823 | cytochrome P450, family 2, subfamily d, polypeptide 22(Cyp2d22)  | 2.1 |
| AK008691  | RIKEN cDNA 2210009P08 gene(2210009P08Rik)                        | 2.1 |
| NM_010128 | epithelial membrane protein 1(Emp1)                              | 2.1 |
| AK020947  | RIKEN cDNA A930040O22 gene(A930040O22Rik)                        | 2.1 |
| M37595    |                                                                  | 2.1 |
| U26798    |                                                                  | 2.1 |
| AK018071  | leucine rich repeat containing 17(Lrrc17)                        | 2.1 |
| NM_008335 |                                                                  | 2.1 |
| AK007177  | RIKEN cDNA 1700112H15 gene(1700112H15Rik)                        | 2.1 |
| NM_009591 | arylalkylamine N-acetyltransferase(Aanat)                        | 2.1 |
| AK007425  | RIKEN cDNA 1810010K12 gene(1810010K12Rik)                        | 2.1 |
| AF318455  |                                                                  | 2.1 |
| AK017739  | protein kinase D3(Prkd3)                                         | 2.1 |
| AA204426  |                                                                  | 2.1 |
| NM_007925 | elastin(Eln)                                                     | 2.1 |
| NM_013684 | TATA box binding protein(Tbp)                                    | 2.1 |
| AK008602  | von Willebrand factor A domain containing 9(Vwa9)                | 2.1 |
| AK019723  | RIKEN cDNA 4930538L07 gene(4930538L07Rik)                        | 2.1 |
| AJ231232  |                                                                  | 2.1 |
| NM_009370 | transforming growth factor, beta receptor I(Tgfb1)               | 2.1 |

---

|           |                                                                                    |     |
|-----------|------------------------------------------------------------------------------------|-----|
| AK005888  | RIKEN cDNA 1700012B07 gene(1700012B07Rik)                                          | 2.1 |
| AK021081  | RIKEN cDNA C030014I23 gene(C030014I23Rik)                                          | 2.1 |
| NM_019518 | GRP1 (general receptor for phosphoinositides 1)-associated scaffold protein(Grasp) | 2.1 |
| AF220294  |                                                                                    | 2.1 |
| AK014665  | peptidyl prolyl isomerase H(Ppih)                                                  | 2.1 |
| NM_025368 | Josephin domain containing 2(Josd2)                                                | 2.1 |
| AK005699  | solute carrier family 16 (monocarboxylic acid transporters), member 13(Slc16a13)   | 2.1 |
| NM_026527 | ChaC, cation transport regulator 2(Chac2)                                          | 2.1 |
| AK007785  | zinc finger protein 335(Zfp335)                                                    | 2.1 |
| NM_021525 | RNA terminal phosphate cyclase-like 1(Rcl1)                                        | 2.1 |
| AK007503  | YdjC homolog (bacterial)(YdjC)                                                     | 2.1 |
| NM_011019 | oncostatin M receptor(Osmr)                                                        | 2.1 |
| AK015547  | RIKEN cDNA 5430427N15 gene(5430427N15Rik)                                          | 2.1 |
| NM_010787 | male enhanced antigen 1(Meal)                                                      | 2.1 |
| AK014235  | exportin, tRNA (nuclear export receptor for tRNAs)(Xpot)                           | 2.1 |
| AK020581  | solute carrier family 30 (zinc transporter), member 6(Slc30a6)                     | 2.1 |
| BC011457  | transmembrane and coiled-coil domains 1(Tmco1)                                     | 2.1 |
| X02937    |                                                                                    | 2.2 |
| AK021029  | DNA segment, Chr 4, ERATO Doi 617, expressed(D4Ertd617e)                           | 2.2 |
| AK017346  | forkhead box N3(Foxn3)                                                             | 2.2 |
| AK014672  | GLIS family zinc finger 3(Glis3)                                                   | 2.2 |
| NM_015814 | dickkopf WNT signaling pathway inhibitor 3(Dkk3)                                   | 2.2 |
| AK007343  | heat shock factor binding protein 1-like 1(Hsbp1l1)                                | 2.2 |
| AK008688  | cytochrome P450, family 2, subfamily c, polypeptide 65(Cyp2c65)                    | 2.2 |
| AB072395  | topoisomerase I binding, arginine/serine-rich(Topors)                              | 2.2 |
| NM_009033 | RNA binding motif protein, X-linked like-1(Rbmxl1)                                 | 2.2 |
| NM_025407 | ubiquinol-cytochrome c reductase core protein 1(Uqcrc1)                            | 2.2 |
| NM_008836 | per-hexamer repeat gene 5(Phxr5)                                                   | 2.2 |

---

|           |                                                                                               |     |
|-----------|-----------------------------------------------------------------------------------------------|-----|
| AK014874  | CDKN2A interacting protein(Cdkn2aip)                                                          | 2.2 |
| AK017337  | solute carrier family 6 (neurotransmitter transporter), member 19, opposite strand(Slc6a19os) | 2.2 |
| U20263    | coatamer protein complex, subunit gamma 2, opposite strand 2(Copg2os2)                        | 2.2 |
| AK007700  | syntaxin 18(Stx18)                                                                            | 2.2 |
| AK006889  | RIKEN cDNA 1700065D16 gene(1700065D16Rik)                                                     | 2.2 |
| AJ293897  | ribonuclease P/MRP 25 subunit-like(Rpp25l)                                                    | 2.2 |
| AF110764  | dCTP pyrophosphatase 1(Dctpp1)                                                                | 2.2 |
| AK006890  | spermatogenesis associated 17(Spata17)                                                        | 2.2 |
| X99722    | histone cell cycle regulator(Hira)                                                            | 2.2 |
| AK010736  | zinc finger and BTB domain containing 8a(Zbtb8a)                                              | 2.2 |
| AK016876  | RIKEN cDNA 4933423L19 gene(4933423L19Rik)                                                     | 2.2 |
| BC009090  | tumor necrosis factor, alpha-induced protein 8(Tnfaip8)                                       | 2.2 |
| NM_019702 | Hbs1-like (S. cerevisiae)(Hbs1l)                                                              | 2.2 |
| AF145962  |                                                                                               | 2.2 |
| AK015232  | RIKEN cDNA 4930429C20 gene(4930429C20Rik)                                                     | 2.2 |
| AF050429  |                                                                                               | 2.2 |
| AK019682  | RIKEN cDNA 4930517L18 gene(4930517L18Rik)                                                     | 2.2 |
| AK003420  | cell growth regulator with EF hand domain 1(Cgref1)                                           | 2.2 |
| AK020872  | DNA segment, Chr 5, ERATO Doi 579, expressed(D5Ertd579e)                                      | 2.2 |
| AK011896  | ring finger protein 219(Rnf219)                                                               | 2.2 |
| AK003791  | olfactomedin-like 2B(Olfml2b)                                                                 | 2.2 |
| AK007013  | RIKEN cDNA 1700086D15 gene(1700086D15Rik)                                                     | 2.2 |
| AK019620  | RIKEN cDNA 4930449E18 gene(4930449E18Rik)                                                     | 2.2 |
| NM_009582 | mitogen-activated protein kinase kinase kinase 12(Map3k12)                                    | 2.2 |
| AK016624  | hexamethylene bis-acetamide inducible 2(Hexim2)                                               | 2.2 |
| AK017191  | RIKEN cDNA 5033425B01 gene(5033425B01Rik)                                                     | 2.2 |
| NM_008008 | fibroblast growth factor 7(Fgf7)                                                              | 2.2 |
| BC006782  | pre-mRNA processing factor 3(Prpf3)                                                           | 2.2 |

---

|           |                                                                                             |     |
|-----------|---------------------------------------------------------------------------------------------|-----|
| NM_021447 | tripartite motif-containing 54(Trim54)                                                      | 2.2 |
| BC005471  | zinc finger protein 810(Zfp810)                                                             | 2.2 |
| NM_007419 | adrenergic receptor, beta 1(Adrb1)                                                          | 2.2 |
| AK007154  | RIKEN cDNA 1700109K24 gene(1700109K24Rik)                                                   | 2.2 |
| AK006942  | RIKEN cDNA 1700072O05 gene(1700072O05Rik)                                                   | 2.2 |
| AK007219  | RIKEN cDNA 1700120O09 gene(1700120O09Rik)                                                   | 2.2 |
| NM_020517 | lens epithelial protein(Lenep)                                                              | 2.2 |
| AK004481  | valyl-tRNA synthetase 2, mitochondrial(Vars2)                                               | 2.2 |
| AK018075  | prickle planar cell polarity protein 2(Prickle2)                                            | 2.2 |
| AK015766  | ubiquitin specific peptidase 50(Usp50)                                                      | 2.2 |
| AK006729  | RIKEN cDNA 1700048J15 gene(1700048J15Rik)                                                   | 2.2 |
| AK018532  | RIKEN cDNA 9030601B04 gene(9030601B04Rik)                                                   | 2.2 |
| AK020407  | RIKEN cDNA 9430007M09 gene(9430007M09Rik)                                                   | 2.2 |
| AY038079  | F-box and WD-40 domain protein 11(Fbxw11)                                                   | 2.2 |
| AK019805  | RIKEN cDNA 4930571O06 gene(4930571O06Rik)                                                   | 2.2 |
| NM_016681 | checkpoint kinase 2(Chek2)                                                                  | 2.2 |
| NM_008421 | potassium voltage gated channel, Shaw-related subfamily, member 1(Kcnc1)                    | 2.2 |
| NM_025618 | sorcin(Sri)                                                                                 | 2.2 |
| NM_025637 | RWD domain containing 3(Rwdd3)                                                              | 2.2 |
| NM_010356 | glutathione S-transferase, alpha 3(Gsta3)                                                   | 2.2 |
| BC010793  | polymerase (RNA) III (DNA directed) polypeptide H(Polr3h)                                   | 2.2 |
| BC009020  | zinc finger, CCHC domain containing 14(Zcchc14)                                             | 2.2 |
| NM_021272 | fatty acid binding protein 7, brain(Fabp7)                                                  | 2.2 |
| NM_018856 | cyclin L2(Ccnl2)                                                                            | 2.2 |
| AK006533  | RWD domain containing 2A(Rwdd2a)                                                            | 2.2 |
| AK018192  | solute carrier family 24 (sodium/potassium/calcium exchanger), member 2(Slc24a2)            | 2.2 |
| AK008694  | transcription elongation factor A (SII) N-terminal and central domain containing 2(Tceanc2) | 2.2 |
| BC003867  | formin binding protein 1(Fnbp1)                                                             | 2.2 |

---

|           |                                                                                                   |     |
|-----------|---------------------------------------------------------------------------------------------------|-----|
| AJ409466  |                                                                                                   | 2.2 |
| Z12229    |                                                                                                   | 2.2 |
| NM_018743 | glycerol-3-phosphate acyltransferase 4(Gpat4)                                                     | 2.3 |
| AK016148  | RIKEN cDNA 4930556J24 gene(4930556J24Rik)                                                         | 2.3 |
| AK003833  |                                                                                                   | 2.3 |
| NM_013465 | alpha-2-HS-glycoprotein(Ahsg)                                                                     | 2.3 |
| AK003578  | SHANK-associated RH domain interacting protein(Sharpin)                                           | 2.3 |
| AK014481  | AT rich interactive domain 2 (ARID, RFX-like)(Arid2)                                              | 2.3 |
| NM_025436 | methylsterol monooxygenase 1(Msmo1)                                                               | 2.3 |
| AK017553  | collagen, type XIV, alpha 1(Col14a1)                                                              | 2.3 |
| AK014924  | RIKEN cDNA 4921519G19 gene(4921519G19Rik)                                                         | 2.3 |
| L15321    |                                                                                                   | 2.3 |
| NM_009133 | stathmin-like 3(Stmn3)                                                                            | 2.3 |
| AK020111  | RIKEN cDNA 6720418B01 gene(6720418B01Rik)                                                         | 2.3 |
| NM_013617 | olfactory receptor 64(Olfr64)                                                                     | 2.3 |
| BC013544  | thioredoxin-related transmembrane protein 2(Tmx2)                                                 | 2.3 |
| AK014851  | family with sequence similarity 71, member D(Fam71d)                                              | 2.3 |
| NM_007617 | caveolin 3(Cav3)                                                                                  | 2.3 |
| AK014068  | solute carrier family 25 (mitochondrial carrier, Graves disease autoantigen), member 16(Slc25a16) | 2.3 |
| AK018382  | zinc finger, ZZ-type with EF hand domain 1(Zzef1)                                                 | 2.3 |
| AK020279  | RIKEN cDNA 9130214F15 gene(9130214F15Rik)                                                         | 2.3 |
| NM_019794 | DnaJ heat shock protein family (Hsp40) member A2(Dnaja2)                                          | 2.3 |
| X86534    |                                                                                                   | 2.3 |
| AK015366  | RIKEN cDNA 4930442P07 gene(4930442P07Rik)                                                         | 2.3 |
| AK002772  | Purkinje cell protein 4-like 1(Pcp4l1)                                                            | 2.3 |
| U55685    |                                                                                                   | 2.3 |
| AF033565  | CDC-like kinase 3(Clk3)                                                                           | 2.3 |
| AK016769  | RIKEN cDNA 4933411E08 gene(4933411E08Rik)                                                         | 2.3 |



|           |                                                                                                   |     |
|-----------|---------------------------------------------------------------------------------------------------|-----|
| AF357423  | small nucleolar RNA, H/ACA box 35(Snora35)                                                        | 2.3 |
| U13262    | myelin basic protein expression factor 2, repressor(Myef2)                                        | 2.3 |
| NM_025437 | eukaryotic translation initiation factor 1A, X-linked(Eif1ax)                                     | 2.3 |
| AK015268  | RIKEN cDNA 4930431H11 gene(4930431H11Rik)                                                         | 2.3 |
| BC003286  | ankyrin repeat domain 13a(Ankrd13a)                                                               | 2.3 |
| AK012913  | B cell CLL/lymphoma 11A (zinc finger protein)(Bcl11a)                                             | 2.3 |
|           | sema domain, seven thrombospondin repeats (type 1 and type 1-like), transmembrane domain (TM) and |     |
| NM_009154 | short cytoplasmic domain, (semaphorin) 5A(Sema5a)                                                 | 2.3 |
| NM_009046 | avian reticuloendotheliosis viral (v-rel) oncogene related B(Relb)                                | 2.3 |
| NM_024189 | YY1 associated factor 2(Yaf2)                                                                     | 2.3 |
| AK021129  | RIKEN cDNA 9530077C05 gene(9530077C05Rik)                                                         | 2.3 |
| AK018179  |                                                                                                   | 2.3 |
| NM_016701 | nestin(Nes)                                                                                       | 2.3 |
| AK015348  | ubiquitin-conjugating enzyme E2W (putative)(Ube2w)                                                | 2.3 |
| Z12271    |                                                                                                   | 2.3 |
| NM_023788 | melanoma antigen, family H, 1(Mageh1)                                                             | 2.3 |
| AK011000  | peptidylprolyl isomerase (cyclophilin)-like 3(Ppil3)                                              | 2.3 |
| X73020    |                                                                                                   | 2.3 |
| AK006052  | RIKEN cDNA 1700016P04 gene(1700016P04Rik)                                                         | 2.3 |
| AB041610  | component of oligomeric golgi complex 8(Cog8)                                                     | 2.3 |
| AK015230  |                                                                                                   | 2.3 |
| AY033886  | solute carrier family 5 (sodium/glucose cotransporter), member 2(Slc5a2)                          | 2.3 |
| AK007529  | RIKEN cDNA 1810017P11 gene(1810017P11Rik)                                                         | 2.3 |
| NM_013493 | cellular nucleic acid binding protein(Cnbp)                                                       | 2.3 |
| AK015846  | RIKEN cDNA 4930519N06 gene(4930519N06Rik)                                                         | 2.3 |
| AK008096  | cytochrome c oxidase assembly protein 11(Cox11)                                                   | 2.3 |
| BC004614  | mitochondrial ribosomal protein L30(Mrpl30)                                                       | 2.4 |
| BC003941  | zinc finger protein 639(Zfp639)                                                                   | 2.4 |

---

|           |                                                                                    |     |
|-----------|------------------------------------------------------------------------------------|-----|
| AF357317  | small nucleolar RNA, C/D box 17(Snord17)                                           | 2.4 |
| AF331708  | natriuretic peptide receptor 2(Npr2)                                               | 2.4 |
| AK020996  | RIKEN cDNA B230207M22 gene(B230207M22Rik)                                          | 2.4 |
| D29770    |                                                                                    | 2.4 |
| U29496    | zinc finger protein 82(Zfp82)                                                      | 2.4 |
| NM_010676 | keratin associated protein 19-5(Krtap19-5)                                         | 2.4 |
| NM_026021 | zinc finger, MYND domain containing 19(Zmynd19)                                    | 2.4 |
| AB041263  | N-acetylneuraminic acid synthase (sialic acid synthase)(Nans)                      | 2.4 |
| AK014137  | RIKEN cDNA 3110038A09 gene(3110038A09Rik)                                          | 2.4 |
| NM_016682 | ubiquitin-like modifier activating enzyme 2(Uba2)                                  | 2.4 |
| NM_026925 | pancreatic lipase(Pnlip)                                                           | 2.4 |
| NM_016843 | ataxin 10(Atxn10)                                                                  | 2.4 |
| AK003497  | SRX (sex determining region Y)-box 6, opposite strand(Sox6os)                      | 2.4 |
| AK007608  | RIKEN cDNA 1810026J23 gene(1810026J23Rik)                                          | 2.4 |
| X14930    |                                                                                    | 2.4 |
| AK020016  | RIKEN cDNA 5830420C07 gene(5830420C07Rik)                                          | 2.4 |
| AK012831  | DnaJ heat shock protein family (Hsp40) member C6(Dnajc6)                           | 2.4 |
| AJ011107  | chloride channel, voltage-sensitive 1(Clc1)                                        | 2.4 |
| AK004069  | TAO kinase 2(Taok2)                                                                | 2.4 |
| AB042155  | zinc finger protein of the cerebellum 5(Zic5)                                      | 2.4 |
| AK020460  |                                                                                    | 2.4 |
| AK009897  | ataxia, cerebellar, Cayman type, opposite strand(Atcayos)                          | 2.4 |
| U48241    | D4, zinc and double PHD fingers family 1(Dpf1)                                     | 2.4 |
| AK019113  | lipase, member H(Liph)                                                             | 2.4 |
| AK007270  | sperm acrosome associated 1(Spaca1)                                                | 2.4 |
| BC011383  | HECT and RLD domain containing E3 ubiquitin protein ligase family member 1(Herc1)  | 2.4 |
| NM_026804 | cell death-inducing DNA fragmentation factor, alpha subunit-like effector B(Cideb) | 2.4 |
| L37148    |                                                                                    | 2.4 |

---

|           |                                                              |     |
|-----------|--------------------------------------------------------------|-----|
| AK020216  | RIKEN cDNA 8030479D07 gene(8030479D07Rik)                    | 2.4 |
| AF039839  |                                                              | 2.4 |
| D12728    |                                                              | 2.4 |
| Z12521    |                                                              | 2.4 |
| AF220209  | Nedd4 family interacting protein 1(Ndfip1)                   | 2.4 |
| U05819    |                                                              | 2.4 |
| NM_025895 | mediator complex subunit 28(Med28)                           | 2.4 |
| AK004572  | poly(A)-specific ribonuclease (deadenylation nuclease)(Parn) | 2.4 |
| NM_009491 | vomerolnasal 2, receptor 10(Vmn2r10)                         | 2.4 |
| AF149291  | transgelin 2(Tagln2)                                         | 2.5 |
| AK003083  | syncollin(Syncn)                                             | 2.5 |
| M34525    |                                                              | 2.5 |
| NM_008250 | H2.0-like homeobox(Hlx)                                      | 2.5 |
| AB041601  | transmembrane protein 191C(Tmem191c)                         | 2.5 |
| AK012318  |                                                              | 2.5 |
| NM_009146 | ferric-chelate reductase 1(Frrs1)                            | 2.5 |
| BC014738  | methionine sulfoxide reductase A(Msra)                       | 2.5 |
| Y10969    |                                                              | 2.5 |
| NM_013566 | integrin beta 7(Itgb7)                                       | 2.5 |
| AK009638  | polycomb group ring finger 3(Pcgf3)                          | 2.5 |
| AK014909  | RIKEN cDNA 4921517D22 gene(4921517D22Rik)                    | 2.5 |
| L10895    | prostate tumor over expressed gene 1(Ptov1)                  | 2.5 |
| AK010014  | interferon, alpha-inducible protein 27 like 2A(Ifi27l2a)     | 2.5 |
| AK009420  | ring finger protein 113A2(Rnf113a2)                          | 2.5 |
| AF011413  | vomerolnasal 2, receptor 88(Vmn2r88)                         | 2.5 |
| AK007057  | ubiquitin specific peptidase 46, opposite strand 1(Usp46os1) | 2.5 |
| AK018947  | RIKEN cDNA 1700109O10 gene(1700109O10Rik)                    | 2.5 |
| AK020596  | RIKEN cDNA 9530046B11 gene(9530046B11Rik)                    | 2.5 |

---

|           |                                                                 |     |
|-----------|-----------------------------------------------------------------|-----|
| AK015560  | zinc finger protein 572(Zfp572)                                 | 2.5 |
| NM_007640 | CD1d2 antigen(Cd1d2)                                            | 2.5 |
| NM_011274 | URI1, prefoldin-like chaperone(Uri1)                            | 2.5 |
| AJ272163  | estrogen receptor 1 (alpha)(Esr1)                               | 2.6 |
| S51858    | calcium binding protein 39(Cab39)                               | 2.6 |
| AF398971  | ankyrin repeat and SOCS box-containing 10(Asb10)                | 2.6 |
| AK014912  | cyclic nucleotide binding domain containing 2(Cnbd2)            | 2.6 |
| BC009022  | isocitrate dehydrogenase 3 (NAD+) beta(Idh3b)                   | 2.6 |
| X55507    |                                                                 | 2.6 |
| AK010042  | serine peptidase inhibitor, Kazal type 5(Spink5)                | 2.6 |
| AK015055  | RIKEN cDNA 4930402N20 gene(4930402N20Rik)                       | 2.6 |
| AK008951  |                                                                 | 2.6 |
| U78502    |                                                                 | 2.6 |
| U05672    | adenosine A2a receptor(Adora2a)                                 | 2.6 |
| AB035381  | ATPase type 13A1(Atp13a1)                                       | 2.6 |
| AK019990  | homeobox A3(Hoxa3)                                              | 2.6 |
| NM_024264 | cytochrome P450, family 27, subfamily a, polypeptide 1(Cyp27a1) | 2.6 |
| AF012154  |                                                                 | 2.6 |
| AK014062  | RIKEN cDNA 3110018I06 gene(3110018I06Rik)                       | 2.6 |
| NM_008216 | hyaluronan synthase 2(Has2)                                     | 2.7 |
| AK008065  | transmembrane protein 236(Tmem236)                              | 2.7 |
| AJ007734  | small nucleolar RNA, C/D box 7(Snord7)                          | 2.7 |
| AK015042  | RIKEN cDNA 4930402C01 gene(4930402C01Rik)                       | 2.7 |
| AK012934  | germ cell-less, spermatogenesis associated 1(Gmcl1)             | 2.7 |
| NM_008873 | plasminogen activator, urokinase(Plau)                          | 2.7 |
| AF349144  |                                                                 | 2.7 |
| AK009225  | shisa family member 5(Shisa5)                                   | 2.7 |
| NM_010727 | ligand of numb-protein X 1(Lnx1)                                | 2.7 |

---

|           |                                                                            |     |
|-----------|----------------------------------------------------------------------------|-----|
| NM_019671 | neuroepithelial cell transforming gene 1(Net1)                             | 2.7 |
| NM_011826 | HCLS1 associated X-1(Hax1)                                                 | 2.7 |
| AK010745  | biogenesis of lysosomal organelles complex-1, subunit 2(Bloc1s2)           | 2.7 |
| NM_009001 | RAB3A, member RAS oncogene family(Rab3a)                                   | 2.7 |
| AK005250  | solute carrier family 25 (mitochondrial carrier), member 18(Slc25a18)      | 2.7 |
| AK017787  | ubiquitin-like modifier activating enzyme 5(Uba5)                          | 2.7 |
| AK015748  | RIKEN cDNA 4930511C11 gene(4930511C11Rik)                                  | 2.8 |
| AF332067  | TELO2 interacting protein 1(Tti1)                                          | 2.8 |
| AK006144  | testis-specific serine kinase 4(Tssk4)                                     | 2.8 |
| AK018511  | myosin IIIA(Myosin3a)                                                      | 2.8 |
| NM_009144 | secreted frizzled-related protein 2(Sfrp2)                                 | 2.8 |
| AK016382  | RIKEN cDNA 4930590L20 gene(4930590L20Rik)                                  | 2.8 |
| NM_019637 | serine/threonine/tyrosine interaction protein(Styx)                        | 2.8 |
| NM_007671 | cyclin-dependent kinase inhibitor 2C (p18, inhibits CDK4)(Cdkn2c)          | 2.8 |
| BC010981  | cDNA sequence BC010981(BC010981)                                           | 2.8 |
| NM_008809 | platelet derived growth factor receptor, beta polypeptide(Pdgfrb)          | 2.8 |
| AK019159  | neogenin(Neo1)                                                             | 2.8 |
| AK010814  | RIKEN cDNA 2410152P15 gene(2410152P15Rik)                                  | 2.8 |
| AK006641  | RIKEN cDNA 1700039E22 gene(1700039E22Rik)                                  | 2.8 |
| NM_010916 | nescient helix loop helix 1(Nhlh1)                                         | 2.8 |
| BC011300  | Fgfr1op N-terminal like(Fopnl)                                             | 2.8 |
| AK019831  | RIKEN cDNA 4930588D02 gene(4930588D02Rik)                                  | 2.8 |
| BC011201  | protein O-linked mannose beta 1,2-N-acetylglucosaminyltransferase(Pomgnt1) | 2.8 |
| NM_007801 | cathepsin H(Ctsh)                                                          | 2.9 |
| AF301017  | chemokine (C-X-C motif) ligand 16(Cxcl16)                                  | 2.9 |
| NM_010929 | notch 4(Notch4)                                                            | 2.9 |
| AK005238  | suppressor of cytokine signaling 6(Socs6)                                  | 2.9 |
| AF384100  | mitofusin 2(Mfn2)                                                          | 2.9 |

|           |                                                                                                            |     |
|-----------|------------------------------------------------------------------------------------------------------------|-----|
|           | methylenetetrahydrofolate dehydrogenase (NAD <sup>+</sup> dependent), methenyltetrahydrofolate cyclohydro- |     |
| NM_008638 | lase(Mthfd2)                                                                                               | 2.9 |
| AK016169  | RIKEN cDNA 4930558C23 gene(4930558C23Rik)                                                                  | 2.9 |
| BC006036  | HMG box domain containing 4(Hmgxb4)                                                                        | 2.9 |
| AK014088  | RIKEN cDNA 3110027N22 gene(3110027N22Rik)                                                                  | 2.9 |
| AK008024  | solute carrier family 7 (cationic amino acid transporter, y <sup>+</sup> system), member 15(Slc7a15)       | 2.9 |
| NM_009540 | zinc finger protein, autosomal, pseudogene(Zfa-ps)                                                         | 2.9 |
| AK008392  | calcineurin-like EF hand protein 2(Chp2)                                                                   | 2.9 |
| M94308    |                                                                                                            | 3.0 |
| NM_018854 | intraflagellar transport 20(Ift20)                                                                         | 3.0 |
| U39066    | mitogen-activated protein kinase kinase 6(Map2k6)                                                          | 3.0 |
| AB026046  | membrane-spanning 4-domains, subfamily A, member 10(Ms4a10)                                                | 3.0 |
| NM_020564 | sulfotransferase family 5A, member 1(Sult5a1)                                                              | 3.0 |
| NM_008258 | hematological and neurological expressed sequence 1(Hn1)                                                   | 3.0 |
| NM_016749 | myosin binding protein H(Mybph)                                                                            | 3.1 |
| NM_021877 | hairless(Hr)                                                                                               | 3.1 |
| NM_019912 | ubiquitin-conjugating enzyme E2D 2A(Ube2d2a)                                                               | 3.1 |
| NM_028744 | phosphatidylinositol 4-kinase type 2 beta(Pi4k2b)                                                          | 3.1 |
| AY042199  |                                                                                                            | 3.1 |
| M16357    | major urinary protein 3(Mup3)                                                                              | 3.1 |
| AK014010  | uncharacterized LOC100049077(LOC100049077)                                                                 | 3.1 |
| NM_011144 | peroxisome proliferator activated receptor alpha(Ppara)                                                    | 3.1 |
| NM_026275 | ubiquitin-conjugating enzyme E2R 2(Ube2r2)                                                                 | 3.1 |
| AK008511  | upregulated during skeletal muscle growth 5(Usmg5)                                                         | 3.1 |
| AK020715  | patched 1(Ptch1)                                                                                           | 3.1 |
| AK014156  | RIKEN cDNA 2310057M21 gene(2310057M21Rik)                                                                  | 3.1 |
| AY029528  | exportin 6(Xpo6)                                                                                           | 3.1 |
| AK006081  | RIKEN cDNA 1700018C11 gene(1700018C11Rik)                                                                  | 3.2 |

---

|           |                                                                                          |     |
|-----------|------------------------------------------------------------------------------------------|-----|
| AJ132433  | proline rich 15(Prr15)                                                                   | 3.2 |
| NM_025634 | transmembrane epididymal family member 3(Teddm3)                                         | 3.2 |
| NM_012065 | phosphodiesterase 6G, cGMP-specific, rod, gamma(Pde6g)                                   | 3.2 |
| AK011425  | solute carrier family 25 (mitochondrial carrier, phosphate carrier), member 24(Slc25a24) | 3.2 |
| AK014513  | RIKEN cDNA 4631405K08 gene(4631405K08Rik)                                                | 3.2 |
| U85993    | Bardet-Biedl syndrome 9 (human)(Bbs9)                                                    | 3.2 |
| AK010096  | angiomotin-like 1(Amotl1)                                                                | 3.3 |
| NM_029203 | reproductive homeobox 2A(Rhox2a)                                                         | 3.3 |
| AY073184  |                                                                                          | 3.3 |
| BC007157  | transmembrane protein 94(Tmem94)                                                         | 3.3 |
| AK002477  | plasma membrane proteolipid(Plp)                                                         | 3.3 |
| NM_010014 | disabled 1(Dab1)                                                                         | 3.3 |
| AK014620  | RIKEN cDNA 4633402D09 gene(4633402D09Rik)                                                | 3.4 |
| X02932    |                                                                                          | 3.4 |
| M82903    | Myb-related transcription factor, partner of profilin(Mypop)                             | 3.5 |
| AK007111  | RIKEN cDNA 1700102F20 gene(1700102F20Rik)                                                | 3.5 |
| AK005374  | ubiquinol-cytochrome c reductase, complex III subunit VII(Uqcrcq)                        | 3.6 |
| AK002612  | spectrin repeat containing, nuclear envelope family member 4(Syne4)                      | 3.6 |
| BC006938  | phosphatidylinositol glycan anchor biosynthesis, class C(Pigc)                           | 3.7 |
| AJ409468  |                                                                                          | 3.7 |
| AK019163  | zinc finger protein 623(Zfp623)                                                          | 3.8 |
| NM_025304 | leucine carboxyl methyltransferase 1(Lcmt1)                                              | 3.8 |
| NM_009346 | TEA domain family member 1(Tead1)                                                        | 4.0 |
| NM_008090 | GATA binding protein 2(Gata2)                                                            | 4.1 |
| X76850    | MAP kinase-activated protein kinase 2(Mapkapk2)                                          | 4.1 |
| AF237887  | regulator of calcineurin 2(Rcan2)                                                        | 4.1 |
| NM_032005 | T-box 19(Tbx19)                                                                          | 4.2 |
| Z12755    |                                                                                          | 4.3 |

---

|           |                                                    |     |
|-----------|----------------------------------------------------|-----|
| AK016850  | golgi autoantigen, golgin subfamily a, 7B(Golga7b) | 4.3 |
| AF230400  | tripartite motif-containing 23(Trim23)             | 5.1 |
| NM_010813 | max binding protein(Mnt)                           | 5.1 |

---
